# Supplementary material for: Diboration of alkenes and alkynes with a carborane-fused four-membered boracycle bearing an electron-precise B–B bond
Source: Royal Society of Chemistry journal article supplement (doi:10.1039/d1dt03665c), 2021-01-01
Supplement: d1dt03665c1.pdf [file d1dt03665c1.pdf]

## Electronic Supplementary Information

### Diboration of Alkenes and Alkynes with a Carborane-fused Four-Membered Boracycle Bearing an Electron-Precise B-B Bond

Minling Zhong, Jie Zhang, Zhenpin Lu\* and Zuowei Xie\*

*Department of Chemistry and State Key Laboratory of Synthetic Chemistry, The Chinese University of Hong Kong, Shatin, New Territories, Hong Kong, China*

E-mail: [zxie@cuhk.edu.hk](mailto:zxie@cuhk.edu.hk)

#### Table of Contents

|                                                           |     |
|-----------------------------------------------------------|-----|
| Experimental Section                                      | S2  |
| Proposed reaction mechanism for the formation of <b>6</b> | S7  |
| Crystal Data                                              | S8  |
| Computational Data                                        | S11 |
| NMR spectra                                               | S20 |
| References                                                | S55 |

## Experimental Section

**General Procedure.** All operations were carried out under a dry argon atmosphere using standard Schlenk and glovebox techniques. All organic solvents were dried and distilled by standard methods prior to use.  $^1\text{H}$ ,  $^{13}\text{C}$  and  $^{11}\text{B}$  NMR spectra were recorded on Bruker DPX 400/500 spectrometer at 400/500, 100/125 and 128/160 MHz, respectively. All chemical shifts were reported in  $\delta$  unit with references to the residual solvent resonances of the deuterated solvents for proton and carbon chemical shifts, to external  $\text{BF}_3\cdot\text{OEt}_2$  (0.00 ppm) for boron chemical shifts. NMR multiplicities are abbreviated as follows: s = singlet, d = doublet, q = quartet, m = multiplet, br = broad signal. Compound  $\text{B}_2\text{Br}_4(\text{SMe}_2)_2$ <sup>1</sup> was prepared according to literature procedures. All other chemicals were purchased from either Aldrich, J&K or Acros Chemical Co. and used as received unless otherwise specified.

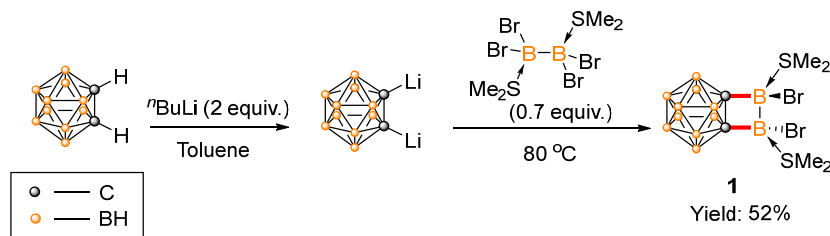

**Preparation of 1,2-[B<sub>2</sub>Br<sub>2</sub>(SMe<sub>2</sub>)<sub>2</sub>]-1,2-C<sub>2</sub>B<sub>10</sub>H<sub>10</sub> (**1**).** To a toluene solution (25 mL) of *o*-C<sub>2</sub>B<sub>10</sub>H<sub>12</sub> (691.0 mg, 4.8 mmol) was slowly added via syringe *n*-BuLi (1.6 M in *n*-hexane, 6.0 mL, 9.6 mmol) at 0 °C under stirring. The reaction mixture was allowed to slowly warm to room temperature and stirred overnight, to which was slowly added via cannula a toluene solution (25 mL) of B<sub>2</sub>Br<sub>4</sub>(SMe<sub>2</sub>)<sub>2</sub> (1582.0 mg, 3.4 mmol). The reaction mixture was heated and stirred at 80 °C overnight. The formed inorganic salts were removed by filtration, the residue was extracted with warm toluene (3×40 mL). All the toluene solutions were combined and concentrated to about 3 mL, from which compound **1** was isolated as a pale-yellow powder (777.0 mg, 52% according to B<sub>2</sub>Br<sub>4</sub>(SMe<sub>2</sub>)<sub>2</sub>) via filtration. X-ray quality crystals of **1** were obtained by slow evaporation from a toluene solution at room temperature.  $^1\text{H}$  NMR (400 MHz, C<sub>6</sub>D<sub>6</sub>):  $\delta$  1.35 ppm (s, 12H, S(CH<sub>3</sub>)<sub>2</sub>).  $^{13}\text{C}\{^1\text{H}\}$  NMR (125 MHz, C<sub>6</sub>D<sub>6</sub>):  $\delta$  21.10 (S(CH<sub>3</sub>)<sub>2</sub>), 18.67 ppm (S(CH<sub>3</sub>)<sub>2</sub>); cage C atoms were not observed.  $^{11}\text{B}$  NMR (160 MHz, C<sub>6</sub>D<sub>6</sub>):  $\delta$  -1.29 (d,  $J_{\text{BH}} = 144.1$  Hz, 3B), -3.05 (s, 2B), -6.34 (d,  $J_{\text{BH}} = 151.4$  Hz, 3B), -9.58 ppm (d,  $J_{\text{BH}} = 167.1$  Hz, 4B). HRMS (ESI-MS): calcd for C<sub>2</sub>H<sub>10</sub>B<sub>12</sub>Br<sub>2</sub> [M+CH<sub>3</sub>OH-H]<sup>+</sup>: 355.05088. Found: 355.05080. M.p.: 201.5–203.7 °C.

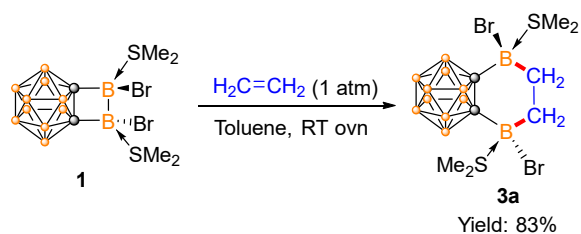

**Preparation of 1,2-[B<sub>2</sub>Br<sub>2</sub>C<sub>2</sub>H<sub>4</sub>(SMe<sub>2</sub>)<sub>2</sub>]-1,2-C<sub>2</sub>B<sub>10</sub>H<sub>10</sub> (**3a**).** In a 100 mL J-Young tube, a toluene solution (20 mL) of **1** (90.0 mg, 0.2 mmol) was subjected to ethylene (1 atm) at room temperature. The reaction mixture was then stirred at room temperature overnight. After filtration, the volatiles were removed in vacuo. Compound **3a** was isolated as a white powder (79.0 mg, 83%). X-ray quality crystals of **3a** were obtained by slow evaporation from a toluene solution at room temperature. <sup>1</sup>H NMR (400 MHz, CD<sub>2</sub>Cl<sub>2</sub>): δ 2.39 (s, 12H, S(CH<sub>3</sub>)<sub>2</sub>), 0.93 ppm (s, 4H, B-CH<sub>2</sub>). <sup>13</sup>C{<sup>1</sup>H} NMR (125 MHz, CD<sub>2</sub>Cl<sub>2</sub>): δ 82.10 (cage C), 23.52 (S(CH<sub>3</sub>)<sub>2</sub>), 21.39 (S(CH<sub>3</sub>)<sub>2</sub>), 17.07 ppm (B-CH<sub>2</sub>). <sup>11</sup>B NMR (128 MHz, CD<sub>2</sub>Cl<sub>2</sub>): δ 4.40 (s, 2B), -2.10 (d, *J*<sub>BH</sub> = 146.7 Hz, 2B), -5.61 (d, *J*<sub>BH</sub> = 149.8 Hz, 2B), -9.58 (unresolved, 4B), -11.09 ppm (unresolved, 2B). HRMS (ESI-MS): calcd for C<sub>4</sub>H<sub>14</sub>B<sub>12</sub>Br<sub>2</sub> [M+Cl]<sup>-</sup>: 387.03280. Found: 387.03269. M.p.: 187.5–188.5 °C.

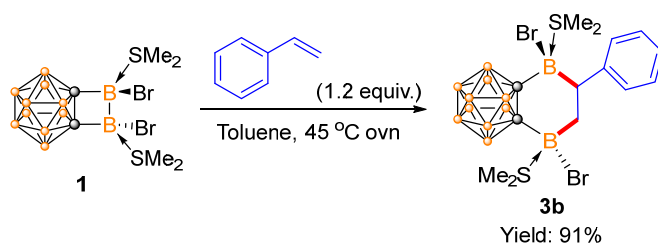

**Preparation of 1,2-[B<sub>2</sub>Br<sub>2</sub>C<sub>3</sub>H<sub>8</sub>(SMe<sub>2</sub>)<sub>2</sub>]-1,2-C<sub>2</sub>B<sub>10</sub>H<sub>10</sub> (**3b**).** To a toluene solution (10 mL) of **1** (45.0 mg, 0.1 mmol) was added a toluene solution (5 mL) of styrene (13.0 mg, 14 μL, 0.12 mmol) at room temperature. The reaction mixture was heated and stirred at 45 °C overnight. After removal of the precipitates, the volatiles were removed in vacuo. The residue was washed by hexane (2×2mL). Compound **3b** was isolated as a white powder (50.0 mg, 91%). <sup>1</sup>H NMR (400 MHz, CD<sub>2</sub>Cl<sub>2</sub>): δ 7.35 (brs, 2H, aromatic *H*), 7.23 (t, *J* = 7.9 Hz, 2H, aromatic *H*), 7.13 (m, 1H, aromatic *H*), 2.63 (d, *J* = 12.9 Hz, 1H, B-CH), 2.20 (brs, 12H, S(CH<sub>3</sub>)<sub>2</sub>), 1.60 (t, *J* = 13.3 Hz, 1H, B-CH<sub>2</sub>), 0.87 ppm (d, *J* = 13.5 Hz, 1H, B-CH<sub>2</sub>). <sup>13</sup>C{<sup>1</sup>H} NMR (100 MHz, CD<sub>2</sub>Cl<sub>2</sub>): δ 148.82 (aromatic C), 129.33 (aromatic C), 128.42 (aromatic C), 126.04 (aromatic C), 34.04 (B-CH), 29.24 (B-CH<sub>2</sub>), 22.28 ppm (S(CH<sub>3</sub>)<sub>2</sub>); cage C were not observed. <sup>11</sup>B NMR (128 MHz, CD<sub>2</sub>Cl<sub>2</sub>): δ 6.65 (s, 1B), 3.84 (s, 1B), -1.98 (d, *J*<sub>BH</sub> = 148.6 Hz, 2B), -5.77 (d, *J*<sub>BH</sub> = 148.9 Hz, 2B), -9.93 ppm (unresolved, 6B). HRMS (ESI-MS): calcd for

$C_{10}H_{18}B_{12}Br_2 [M+Cl]^-$ : 463.06441. Found: 463.06490. M.p.: 203.5–204.9 °C.

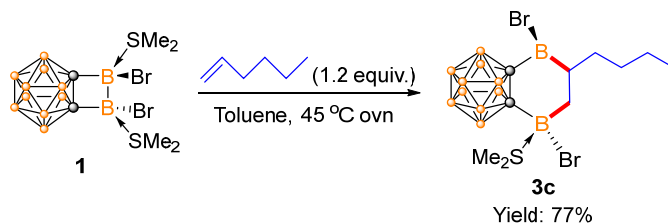

**Preparation of 1,2-[B<sub>2</sub>Br<sub>2</sub>C<sub>6</sub>H<sub>12</sub>(SMe<sub>2</sub>)<sub>2</sub>]-1,2-C<sub>2</sub>B<sub>10</sub>H<sub>10</sub> (3c).** To a toluene solution (10 mL) of **1** (45.0 mg, 0.1 mmol) was added a toluene solution (5 mL) of 1-hexene (10.0 mg, 15  $\mu$ L, 0.12 mmol) at room temperature. The reaction mixture was heated and stirred at 45 °C overnight. After removal of the precipitates, the volatiles were removed in vacuo. The residue was washed by hexane (2 $\times$ 2mL). Compound **3c** was isolated as a pale yellow powder (36.0 mg, 77%). X-ray quality crystals of **3c** were obtained by slow evaporation from a toluene solution at room temperature. <sup>1</sup>H NMR (400 MHz, C<sub>6</sub>D<sub>6</sub>):  $\delta$  1.66-1.44 (m, 10H, S(CH<sub>3</sub>)<sub>2</sub>, CH<sub>2</sub>-CH<sub>2</sub>CH<sub>2</sub>CH<sub>3</sub>, 2H of CH<sub>2</sub>-CH<sub>2</sub>-CH<sub>3</sub>), 1.34 (m, 2H of CH<sub>2</sub>-CH<sub>2</sub>-CH<sub>3</sub>) 1.08 (m, 1H, B-CH), 0.99 (t, J = 6.9 Hz, 3H, CH<sub>2</sub>-CH<sub>3</sub>), 0.86 ppm (m, 2H, B-CH<sub>2</sub>). <sup>13</sup>C{<sup>1</sup>H} NMR (125 MHz, C<sub>6</sub>D<sub>6</sub>):  $\delta$  83.26 (cage C), 81.74 (cage C), 35.17 ((CH<sub>2</sub>-CH<sub>2</sub>-CH<sub>2</sub>-CH<sub>3</sub>), 30.72 (CH<sub>2</sub>-CH<sub>2</sub>-CH<sub>2</sub>-CH<sub>3</sub>), 26.15 (B-CH), 24.25 (B-CH<sub>2</sub>), 23.61 (CH<sub>2</sub>-CH<sub>2</sub>-CH<sub>2</sub>-CH<sub>3</sub>), 19.93 (S(CH<sub>3</sub>)<sub>2</sub>), 14.61 ppm (CH<sub>2</sub>-CH<sub>3</sub>). <sup>11</sup>B NMR (128 MHz, C<sub>6</sub>D<sub>6</sub>):  $\delta$  14.84 (s, 1B), 3.61 (s, 1B), -1.23 (m, unresolved, 2B), -5.46 (d, J<sub>BH</sub> = 148.6 Hz, 2B), -9.90 ppm (br, unresolved, 6B). HRMS (ESI-MS): calcd for C<sub>8</sub>H<sub>22</sub>B<sub>12</sub>Br<sub>2</sub> [M+Cl]<sup>-</sup>: 443.09619. Found: 443.09547. M.p.: 150.9–152.0 °C.

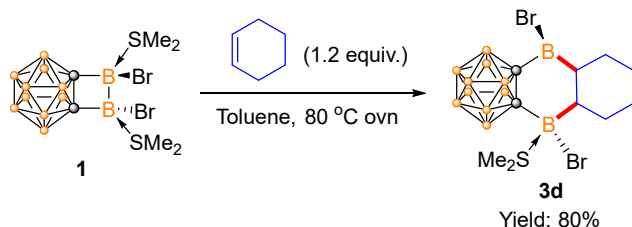

**Preparation of 1,2-[B<sub>2</sub>Br<sub>2</sub>C<sub>6</sub>H<sub>10</sub>(SMe<sub>2</sub>)<sub>2</sub>]-1,2-C<sub>2</sub>B<sub>10</sub>H<sub>10</sub> (3d).** To a toluene solution (10 mL) of **1** (45.0 mg, 0.1 mmol) was added a toluene solution (5 mL) of cyclohexene (10.0 mg, 12  $\mu$ L, 0.12 mmol) at room temperature. The reaction mixture was heated and stirred at 80 °C overnight. After removal of the precipitates, the volatiles were removed in vacuo. The residue was washed by hexane (2 $\times$ 2mL). Compound **3d** was isolated as a white powder (38.0 mg, 80%). <sup>1</sup>H NMR (500 MHz, CD<sub>2</sub>Cl<sub>2</sub>):  $\delta$  2.56 (s, 3H, S(CH<sub>3</sub>)<sub>2</sub>), 2.46 (br, 1H, CH<sub>2</sub>), 2.34 (s, 3H, S(CH<sub>3</sub>)<sub>2</sub>), 1.83 (s, 1H, B-CH), 1.73 (m, 1H, CH<sub>2</sub>), 1.68 (m, 1H, CH<sub>2</sub>), 1.50 (m, 4H, 3H of CH<sub>2</sub>, 1H of B-CH), 1.24 (m, 1H, CH<sub>2</sub>), 1.17 ppm (m, 1H, CH<sub>2</sub>). <sup>13</sup>C{<sup>1</sup>H} NMR (125 MHz, CD<sub>2</sub>Cl<sub>2</sub>):  $\delta$  79.92 (cage C),

75.20 (cage C), 40.63 (B-C), 38.49 (B-C), 32.37 (CH<sub>2</sub>), 31.42 (CH<sub>2</sub>), 28.88 (CH<sub>2</sub>), 25.50 (CH<sub>2</sub>), 23.36 (S(CH<sub>3</sub>)<sub>2</sub>), 22.17 ppm (S(CH<sub>3</sub>)<sub>2</sub>). <sup>11</sup>B NMR (160 MHz, CD<sub>2</sub>Cl<sub>2</sub>): δ 75.85 (s, 1B), 4.37 (s, 1B), 0.48 to -0.17 (unresolved, 2B), -5.34 (unresolved, 1B), -6.57 (unresolved, 1B), -8.76 (unresolved, 5B), -11.82 ppm (d, *J*<sub>BH</sub> = 174.1 Hz, 1B). HRMS (ESI-MS): calcd for C<sub>8</sub>H<sub>20</sub>B<sub>12</sub>Br<sub>2</sub> [M+H<sub>2</sub>O-H]<sup>-</sup>: 423.11420. Found: 423.11304. M.p.: 183.1–184.2 °C.

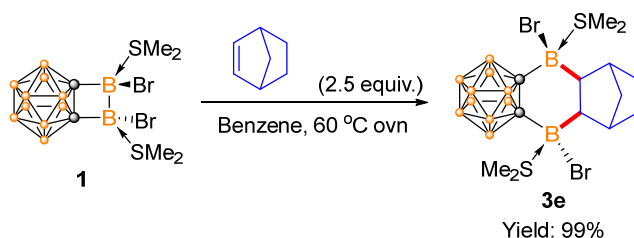

**Preparation of 1,2-[B<sub>2</sub>Br<sub>2</sub>C<sub>7</sub>H<sub>10</sub>(SMe<sub>2</sub>)<sub>2</sub>]-1,2-C<sub>2</sub>B<sub>10</sub>H<sub>10</sub> (3e).** To a benzene solution (10 mL) of **1** (45.0 mg, 0.1 mmol) was added a toluene solution (5 mL) of norbornene (240.0 mg, 0.25 mmol) at room temperature. The reaction mixture was heated and stirred at 60 °C overnight. After cooling down to room temperature, colorless crystals were generated immediately. The supernatant was removed with a syringe, and the volatiles in the residue were removed in vacuo. Compound **3e** was isolated as a white solid (54.0 mg, 99 %). Owing to poor solubility of **3e** in C<sub>6</sub>D<sub>6</sub> or CD<sub>2</sub>Cl<sub>2</sub>, <sup>13</sup>C NMR spectrum was not feasible. <sup>1</sup>H NMR (400 MHz, CD<sub>2</sub>Cl<sub>2</sub>): δ 2.58 (br, 2H), 2.35 (br, 12H, S(CH<sub>3</sub>)<sub>2</sub>), 1.62 (d, *J* = 7.9 Hz, 2H), 1.31 (d, *J* = 7.3 Hz, 2H), 1.25 ppm (d, *J* = 7.1 Hz, 2H). <sup>11</sup>B NMR (160 MHz, C<sub>6</sub>D<sub>6</sub>): δ -0.36 (d, *J*<sub>BH</sub> = 138.4 Hz, 2B), -7.04 (d, *J*<sub>BH</sub> = 125.2 Hz, 4B), -9.93 (unresolved, 4B), -11.72 ppm (d, *J*<sub>BH</sub> = 163.0 Hz, 2B). HRMS (ESI-MS): calcd for C<sub>2</sub>H<sub>10</sub>B<sub>12</sub>Br<sub>2</sub> [M+H<sub>2</sub>O-H]<sup>-</sup>: 435.11426. Found: 435.11382. M.p.: 202.9–204.3 °C.

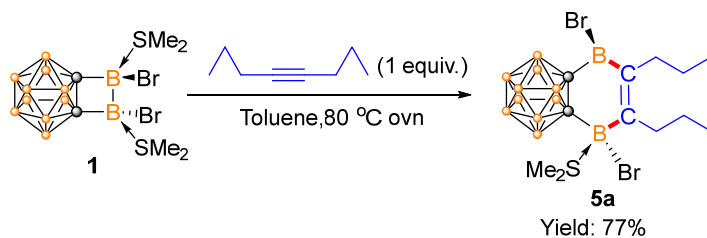

**Preparation of 1,2-[B<sub>2</sub>Br<sub>2</sub>C<sub>8</sub>H<sub>14</sub>(SMe<sub>2</sub>)]-1,2-C<sub>2</sub>B<sub>10</sub>H<sub>10</sub> (5a).** To a toluene solution (20 mL) of **1** (90.0 mg, 0.2 mmol) was added a toluene solution (5 mL) of 4-octyne (23.0 mg, 31 μL, 0.2 mmol) at room temperature. The reaction mixture was heated and stirred at 80 °C overnight. After removal of the precipitates, the volatiles

were removed in vacuo. The residue was washed by hexane ( $2 \times 2$  mL). Compound **5a** was isolated as a yellow powder (72.0 mg, 77%). X-ray quality crystals of **5a** were obtained by recrystallization from toluene at  $-30$  °C.  $^1\text{H}$  NMR (400 MHz,  $\text{C}_6\text{D}_6$ ):  $\delta$  2.25 (m, 4H,  $\text{CH}_2$ ), 1.33 (m, 4H,  $\text{CH}_2$ ), 1.23 (s, 6H,  $\text{S}(\text{CH}_3)_2$ ), 0.92 ppm (t,  $J = 7.2$  Hz, 6H,  $\text{CH}_3$ ).  $^{13}\text{C}\{^1\text{H}\}$  NMR (125 MHz,  $\text{C}_6\text{D}_6$ ):  $\delta$  37.69 ( $\text{CH}_3$ ), 24.44 ( $\text{CH}_2$ ), 21.22 ( $\text{S}(\text{CH}_3)_2$ ), 14.92 ppm ( $\text{CH}_2$ ); cage C were not observed.  $^{11}\text{B}$  NMR (160 MHz,  $\text{C}_6\text{D}_6$ ):  $\delta$  34.39 (s, 2B), 1.05 (d,  $J_{\text{BH}} = 139.6$  Hz, 2B),  $-7.76$  (unresolved, 2B),  $-9.15$  ppm (unresolved, 6B). HRMS (ESI-MS): calcd for  $\text{C}_{10}\text{H}_{24}\text{B}_{12}\text{Br}_2$  [ $\text{M}+\text{H}_2\text{O}-\text{H}$ ] $^-$ : 451.14561. Found: 451.14539. M.p.:  $128.9$ – $131.4$  °C.

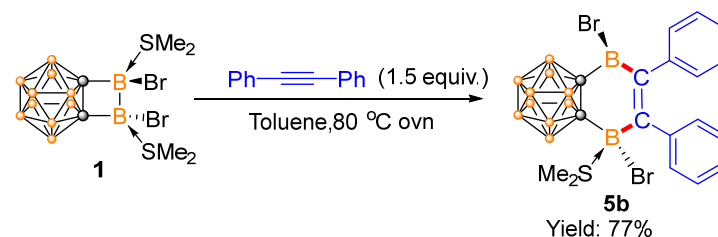

**Preparation of 1,2-[B<sub>2</sub>Br<sub>2</sub>C<sub>14</sub>H<sub>10</sub>(SMe<sub>2</sub>)]-1,2-C<sub>2</sub>B<sub>10</sub>H<sub>10</sub> (**5b**).** To a toluene solution (20 mL) of **1** (45.0 mg, 0.1 mmol) was added a toluene solution (5 mL) of diphenylacetylene (27.0 mg, 0.15 mmol) at room temperature. The reaction mixture was heated and stirred at  $80$  °C overnight. After removal of the precipitates, the volatiles were removed in vacuo. The residue was washed by hexane ( $2 \times 3$  mL). Compound **5b** was isolated as an orange powder (43.0 mg, 77%).  $^1\text{H}$  NMR (400 MHz,  $\text{C}_6\text{D}_6$ ):  $\delta$  6.82 (m, 6H, aromatic  $H$ ), 6.74 (m, 4H, aromatic  $H$ ), 1.15 ppm (s, 6H,  $\text{S}(\text{CH}_3)_2$ ).  $^{13}\text{C}\{^1\text{H}\}$  NMR (125 MHz,  $\text{C}_6\text{D}_6$ ):  $\delta$  143.25 (aromatic C), 129.08 (aromatic C), 127.63 (aromatic C), 126.54 (aromatic C), 21.75 ppm ( $\text{S}(\text{CH}_3)_2$ ), cage C were not observed.  $^{11}\text{B}$  NMR (128 MHz,  $\text{CD}_2\text{Cl}_2$ ):  $\delta$  28.66 (brs, 2B),  $-0.55$  (d,  $J_{\text{BH}} = 149.3$  Hz, 2B),  $-8.08$  (unresolved, 2B),  $-10.19$  ppm (unresolved, 6B). HRMS (ESI-MS): calcd for  $\text{C}_{16}\text{H}_{20}\text{B}_{12}\text{Br}_2$  [ $\text{M}+\text{H}_2\text{O}-\text{H}$ ] $^-$ : 519.11463. Found: 519.11368. M.p.:  $155.5$ – $157.1$  °C.

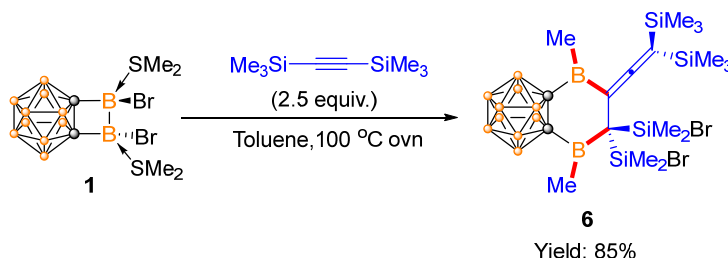

**Preparation of 1,2-[B<sub>2</sub>C<sub>16</sub>H<sub>36</sub>Br<sub>2</sub>Si<sub>4</sub>]-1,2-C<sub>2</sub>B<sub>10</sub>H<sub>10</sub> (**6**).** To a toluene solution (20 mL) of **1** (45.0 mg, 0.1 mmol) was added a toluene solution (5 mL) of bis(trimethylsilyl)acetylene (25.0 mg, 34  $\mu\text{L}$ , 0.15 mmol) at room temperature. The

reaction mixture was heated and stirred at 100 °C overnight. After removal of the precipitates, the volatiles were removed in vacuo. The residue was washed by hexane (2×3mL). Compound **6** was isolated as a pale-yellow powder (56.0 mg, 85%). X-ray quality crystals of **6** were obtained by slow evaporation from a toluene solution at room temperature. <sup>1</sup>H NMR (400 MHz, C<sub>6</sub>D<sub>6</sub>): δ 1.24 (s, 3H, B-CH<sub>3</sub>), 0.99 (s, 3H, B-CH<sub>3</sub>), 0.65 (s, 6H, Si(CH<sub>3</sub>)<sub>2</sub>Br), 0.62 (s, 6H, Si(CH<sub>3</sub>)<sub>2</sub>Br), 0.13 ppm (s, 18H, Si(CH<sub>3</sub>)<sub>3</sub>). <sup>13</sup>C {<sup>1</sup>H} NMR (125 MHz, C<sub>6</sub>D<sub>6</sub>): δ 207.89 (C=C=C), 85.34 (C=C(TMS)<sub>2</sub>), 18.26 (B-CH<sub>3</sub>), 12.03 (B-CH<sub>3</sub>), 9.05 (Si(CH<sub>3</sub>)<sub>2</sub>Br), 8.27 (Si(CH<sub>3</sub>)<sub>2</sub>Br), 1.27 ppm (Si(CH<sub>3</sub>)<sub>3</sub>), cage *C* were not observed. <sup>11</sup>B NMR (160 MHz, C<sub>6</sub>D<sub>6</sub>): δ 73.95 (brs, 1B), 69.17 (brs, 1B), 2.32 (unresolved, 1B), 1.31 (unresolved, 1B), -6.72 (unresolved, 3B), -8.54 to -9.66 (unresolved, 4B), -12.80 ppm (unresolved, 1B). HRMS (FT-MS): calcd for C<sub>18</sub>H<sub>46</sub>B<sub>12</sub>Br<sub>2</sub>Si<sub>4</sub> [M]: 664.22322. Found: 664.22411. M.p.: 132.9 °C(decom.).

### Proposed reaction mechanism for the formation of **6** <sup>2</sup>

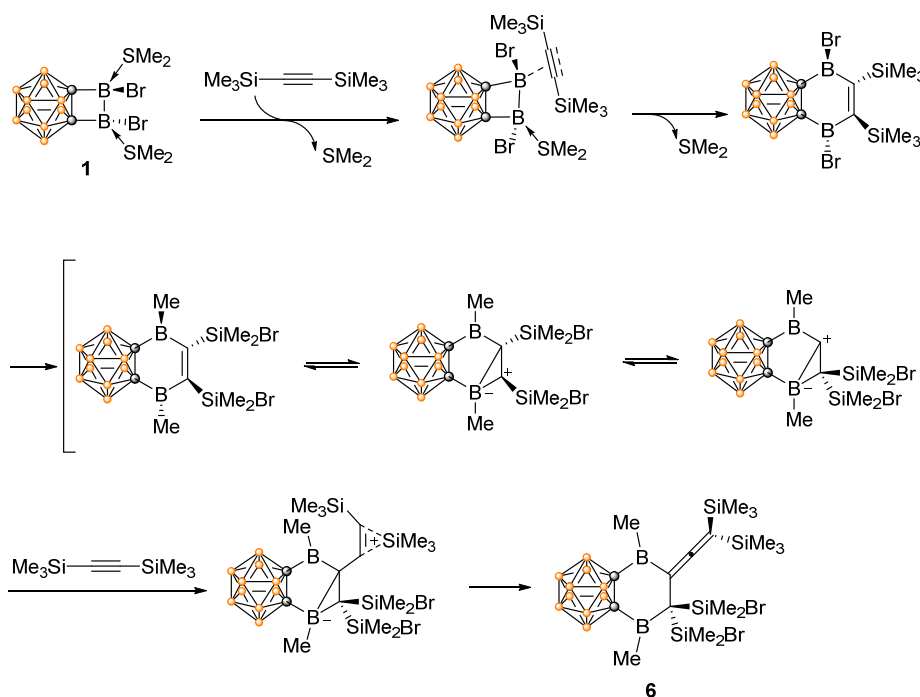

**Figure S1.** Proposed reaction mechanism for the formation of **6**

## Crystal Data

**X-ray Structure Determination.** Single crystals were immersed in Paraton-N oil and sealed under argon in thin-walled glass capillaries. All data were collected at 296 K or 173 K on a Bruker Kappa ApexII Duo Diffractometer using Mo-K $\alpha$  radiation. An empirical absorption correction was applied using the SADABS program.<sup>3</sup> All structures were solved by direct methods and subsequent Fourier difference techniques and refined anisotropically for all non-hydrogen atoms by full-matrix least squares calculations on  $F^2$  using the SHELXTL program package.<sup>4</sup> All hydrogen atoms were geometrically fixed using the riding model. Crystal data and details of data collection and refinement are given in Table S1. Details of the crystal structures were deposited in the Cambridge Crystallographic Data Centre with CCDC 2104196-2104201 for **1**, **3a**, **3c**, **3e**, **5a** and **6**, respectively.



**Table S1.** Crystal Data and Summary of Data Collection and Refinement for **1**, **3a**·0.5toluene, **3c**, **3e**, **5a** and **6**.

| Compound                             | <b>1</b>                                                                      | <b>3a</b> ·0.5toluene                                                            | <b>3c</b>                                                         |
|--------------------------------------|-------------------------------------------------------------------------------|----------------------------------------------------------------------------------|-------------------------------------------------------------------|
| Formula                              | C <sub>6</sub> H <sub>22</sub> B <sub>12</sub> Br <sub>2</sub> S <sub>2</sub> | C <sub>11.5</sub> H <sub>30</sub> B <sub>12</sub> Br <sub>2</sub> S <sub>2</sub> | C <sub>10</sub> H <sub>28</sub> B <sub>12</sub> Br <sub>2</sub> S |
| M <sub>w</sub>                       | 447.89                                                                        | 522.01                                                                           | 469.92                                                            |
| Crystal size (mm <sup>3</sup> )      | 0.40 x 0.30 x 0.20                                                            | 0.50 x 0.40 x 0.30                                                               | 0.40 x 0.30 x 0.20                                                |
| Crystal system                       | monoclinic                                                                    | triclinic                                                                        | triclinic                                                         |
| Space Group                          | I2/a                                                                          | P-1                                                                              | P-1                                                               |
| a, Å                                 | 13.0965(6)                                                                    | 7.1932(5)                                                                        | 10.2053(6)                                                        |
| b, Å                                 | 10.4041(5)                                                                    | 9.4805(6)                                                                        | 10.4663(7)                                                        |
| c, Å                                 | 14.1531(6)                                                                    | 18.3732(12)                                                                      | 11.7394(7)                                                        |
| α, deg                               | 90                                                                            | 76.724(2)                                                                        | 90.808(2)                                                         |
| β, deg                               | 99.845(3)                                                                     | 86.032(2)                                                                        | 111.709(2)                                                        |
| γ, deg                               | 90                                                                            | 73.8340(2)                                                                       | 108.033(2)                                                        |
| V, Å <sup>3</sup>                    | 1900.06(15)                                                                   | 1171.24(13)                                                                      | 1095.94(12)                                                       |
| Z                                    | 4                                                                             | 2                                                                                | 2                                                                 |
| D <sub>calcd</sub> Mg/m <sup>3</sup> | 1.566                                                                         | 1.480                                                                            | 1.424                                                             |
| Radiation (Å)                        | 0.71073                                                                       | 0.71073                                                                          | 0.71073                                                           |
| 2θ range, deg                        | 5.030 to 55.844                                                               | 5.712 to 50.496                                                                  | 4.566 to 50.496                                                   |
| μ, mm <sup>-1</sup>                  | 4.468                                                                         | 3.636                                                                            | 3.786                                                             |
| F(000)                               | 880                                                                           | 522                                                                              | 468                                                               |
| No. of obsd reflns                   | 2278                                                                          | 4236                                                                             | 3945                                                              |
| No. of params<br>refnd               | 103                                                                           | 262                                                                              | 226                                                               |
| Goodness of fit                      | 1.023                                                                         | 1.051                                                                            | 1.043                                                             |
| R1                                   | 0.0254                                                                        | 0.0418                                                                           | 0.0417                                                            |
| wR2                                  | 0.0625                                                                        | 0.1094                                                                           | 0.1025                                                            |

| Compound                                    | <b>3e</b>                                                                      | <b>5a</b>                                                         | <b>6</b>                                                                        |
|---------------------------------------------|--------------------------------------------------------------------------------|-------------------------------------------------------------------|---------------------------------------------------------------------------------|
| Formula                                     | C <sub>13</sub> H <sub>31</sub> B <sub>12</sub> Br <sub>2</sub> S <sub>2</sub> | C <sub>12</sub> H <sub>30</sub> B <sub>12</sub> Br <sub>2</sub> S | C <sub>18</sub> H <sub>46</sub> B <sub>12</sub> Br <sub>2</sub> Si <sub>4</sub> |
| M <sub>w</sub>                              | 541.04                                                                         | 495.96                                                            | 664.45                                                                          |
| Crystal size (mm <sup>3</sup> )             | 0.50 x 0.40 x 0.30                                                             | 0.50 x 0.40 x 0.30                                                | 0.50 x 0.40 x 0.30                                                              |
| Crystal system                              | orthorhombic                                                                   | monoclinic                                                        | triclinic                                                                       |
| Space Group                                 | Pnma                                                                           | Cc                                                                | P-1                                                                             |
| a, Å                                        | 13.4739(3)                                                                     | 9.8716(5)                                                         | 9.2458(3)                                                                       |
| b, Å                                        | 14.7910(3)                                                                     | 26.4281(15)                                                       | 13.6832(5)                                                                      |
| c, Å                                        | 11.6500(3)                                                                     | 9.6977(5)                                                         | 14.5973(5)                                                                      |
| α, deg                                      | 90                                                                             | 90                                                                | 75.7550(10)                                                                     |
| β, deg                                      | 90                                                                             | 114.1930(10)                                                      | 85.9640(10)                                                                     |
| γ, deg                                      | 90                                                                             | 90                                                                | 87.7300(10)                                                                     |
| V, Å <sup>3</sup>                           | 2321.76(9)                                                                     | 2307.8(2)                                                         | 1785.04(11)                                                                     |
| Z                                           | 4                                                                              | 4                                                                 | 2                                                                               |
| <i>D</i> <sub>calcd</sub> Mg/m <sup>3</sup> | 1.551                                                                          | 1.427                                                             | 1.236                                                                           |
| Radiation (Å)                               | 0.71073                                                                        | 0.71073                                                           | 1.54178                                                                         |
| 2θ range, deg                               | 4.622 to 50.496                                                                | 5.194 to 50.496                                                   | 6.666 to 136.840                                                                |
| μ, mm <sup>-1</sup>                         | 3.672                                                                          | 3.600                                                             | 4.216                                                                           |
| F(000)                                      | 1088                                                                           | 992                                                               | 680                                                                             |
| No. of obsd reflns                          | 2151                                                                           | 4155                                                              | 6401                                                                            |
| No. of params refnd                         | 139                                                                            | 244                                                               | 350                                                                             |
| Goodness of fit                             | 1.054                                                                          | 1.035                                                             | 1.090                                                                           |
| R1                                          | 0.0239                                                                         | 0.0273                                                            | 0.0528                                                                          |
| wR2                                         | 0.0597                                                                         | 0.0698                                                            | 0.1429                                                                          |

## Computational Data

Geometry optimizations were carried out with the Gaussian09 program, Revision D.01<sup>5</sup> at the B3LYP<sup>6</sup>-D3<sup>7</sup>/6-31++G(d,p) level of density functional theory. Frequency calculations were made to determine the characteristics of all stationary points as energy minimum or transition states and obtain thermal corrections. Intrinsic reaction coordinates (IRC)<sup>8</sup> were calculated to confirm that transition states lead to relevant intermediates. The solvent effect of toluene was taken into consideration by performing single-point solvation energy calculations with the conductor-like polarizable continuum model (CPCM)<sup>9</sup> using UAKS radii.

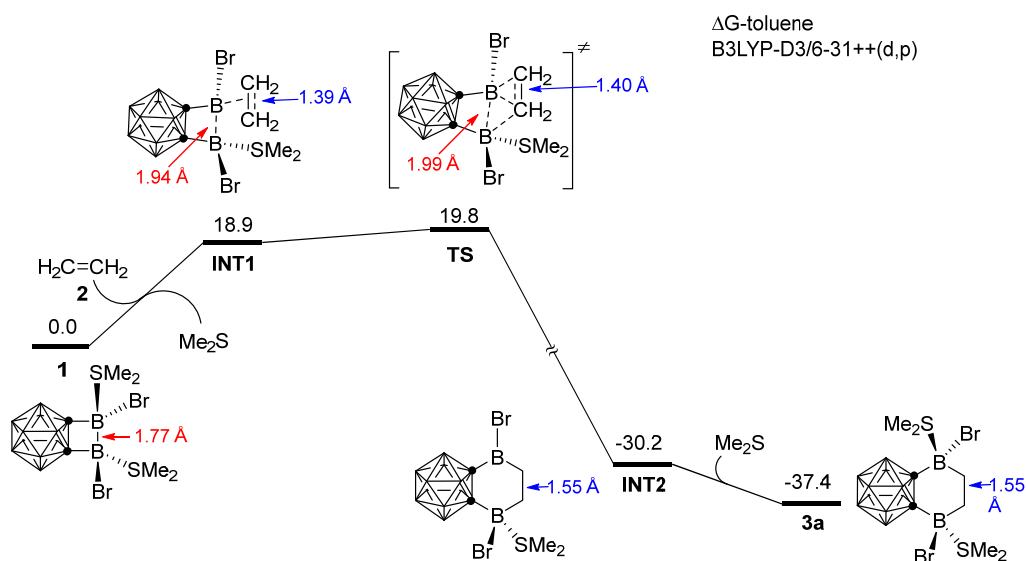

**Figure S2.** Energy profile calculated for the reaction of **1** with ethylene at the B3LYP-D3/6-31++g\*\* level of theory.

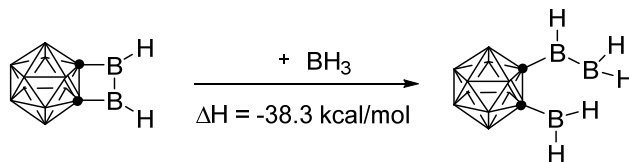

**Figure S3.** Calculated ring strain energy for carborane-fused diborane at the B3LYP-D3/6-31++g\*\* level of theory.

**Cartesian coordinates:**

**2**

|   |             |             |            |
|---|-------------|-------------|------------|
| C | -1.04977300 | 0.15664400  | 0.00000000 |
| H | -0.53443700 | -0.80069400 | 0.00000000 |
| H | -2.13649800 | 0.12375300  | 0.00000000 |
| C | -0.38279600 | 1.31245100  | 0.00000000 |
| H | -0.89813200 | 2.26978900  | 0.00000000 |
| H | 0.70392900  | 1.34534200  | 0.00000000 |

**Me<sub>2</sub>S**

|   |             |            |            |
|---|-------------|------------|------------|
| S | -4.27067500 | 6.04322200 | 2.92830400 |
| C | -4.14292600 | 7.86377600 | 2.83005500 |
| H | -3.35623800 | 8.17321300 | 3.52245400 |
| H | -3.87043200 | 8.18449700 | 1.81983700 |
| H | -5.08226000 | 8.34065800 | 3.12653500 |
| C | -5.60952400 | 5.78881700 | 1.71047100 |
| H | -5.80146200 | 4.71443700 | 1.65671400 |
| H | -6.52735100 | 6.29623400 | 2.02311500 |
| H | -5.31203200 | 6.14464500 | 0.71921400 |

**1**

|    |             |            |            |
|----|-------------|------------|------------|
| Br | -1.46926700 | 6.19687900 | 5.03257000 |
| S  | 0.32745000  | 6.11758800 | 2.31272000 |
| C  | -1.32695400 | 3.74416400 | 3.10148800 |
| C  | 0.03438600  | 7.91113100 | 2.43862000 |
| H  | -0.91683500 | 8.09283100 | 1.93606000 |
| H  | -0.02578800 | 8.20100400 | 3.48863600 |
| H  | 0.83726300  | 8.43446400 | 1.91701900 |
| C  | 1.67491300  | 5.87779700 | 3.51792500 |
| H  | 1.88970300  | 4.80754200 | 3.53592900 |
| H  | 2.55156800  | 6.42749800 | 3.17006200 |
| H  | 1.35369100  | 6.21649400 | 4.50452500 |
| B  | -1.35646500 | 2.42254400 | 4.18411000 |
| H  | -0.92397500 | 2.57016000 | 5.27714500 |
| B  | -0.29877700 | 2.42258600 | 2.76496300 |
| H  | 0.87457900  | 2.57100300 | 2.87476800 |
| B  | -1.13324300 | 3.27147500 | 1.45128100 |

|    |             |             |             |
|----|-------------|-------------|-------------|
| H  | -0.58286000 | 4.00719400  | 0.71500500  |
| B  | -1.27237400 | 0.97761100  | 3.13935200  |
| H  | -0.76686200 | -0.02759300 | 3.52125700  |
| B  | -1.12334100 | 1.52658800  | 1.44268300  |
| H  | -0.50133100 | 0.94514200  | 0.61487400  |
| B  | -1.29942600 | 5.38019300  | 3.15709700  |
| Br | -2.51143300 | 6.19694300  | 0.16682300  |
| S  | -4.30816400 | 6.11760700  | 2.88667700  |
| C  | -2.65378900 | 3.74418000  | 2.09784900  |
| C  | -4.01514500 | 7.91115100  | 2.76069400  |
| H  | -3.06394000 | 8.09289200  | 3.26327200  |
| H  | -3.95496000 | 8.20098000  | 1.71066700  |
| H  | -4.81804800 | 8.43449200  | 3.28224800  |
| C  | -5.65569400 | 5.87772600  | 1.68156300  |
| H  | -5.87045800 | 4.80746500  | 1.66361200  |
| H  | -6.53234100 | 6.42741900  | 2.02946100  |
| H  | -5.33454100 | 6.21639200  | 0.69493100  |
| B  | -2.62429100 | 2.42257800  | 1.01520400  |
| H  | -3.05677900 | 2.57021600  | -0.07782800 |
| B  | -3.68197800 | 2.42260700  | 2.43435100  |
| H  | -4.85533200 | 2.57103800  | 2.32454800  |
| B  | -2.84750400 | 3.27146400  | 3.74804800  |
| H  | -3.39788000 | 4.00717600  | 4.48433600  |
| B  | -2.70839600 | 0.97762800  | 2.05993800  |
| H  | -3.21391900 | -0.02756500 | 1.67801600  |
| B  | -2.85742400 | 1.52657700  | 3.75661600  |
| H  | -3.47944000 | 0.94512500  | 4.58441500  |
| B  | -2.68129900 | 5.38021200  | 2.04227200  |

**INT1**

|    |             |             |             |
|----|-------------|-------------|-------------|
| Br | 0.98858200  | 2.70593600  | -0.28684800 |
| C  | -1.33927200 | 0.68975500  | 0.33774900  |
| B  | -2.67130600 | 1.37374600  | -0.49807300 |
| H  | -2.72134100 | 2.54770500  | -0.64056900 |
| B  | -2.88286400 | 0.63090000  | 1.09517800  |
| H  | -3.07046300 | 1.30192300  | 2.05423300  |
| B  | -1.74856500 | -0.72143400 | 1.22515200  |
| H  | -1.13261300 | -0.95904500 | 2.20319300  |

|           |             |             |             |
|-----------|-------------|-------------|-------------|
| B         | -4.01682300 | 0.22960200  | -0.21119600 |
| H         | -5.14254800 | 0.60659700  | -0.18415300 |
| B         | -3.42322000 | -1.06399300 | 0.87259000  |
| H         | -4.09570100 | -1.60586900 | 1.68696900  |
| B         | 0.16296200  | 1.15464400  | 0.77413900  |
| Br        | 1.44610400  | -2.13646400 | 1.09339100  |
| S         | 1.77263500  | -0.26642200 | -1.53296900 |
| C         | -0.92521300 | -0.77050500 | -0.28873600 |
| C         | 3.42621300  | -0.03326600 | -0.80451600 |
| H         | 3.38242300  | 0.90156000  | -0.24411100 |
| H         | 3.66513400  | -0.87134600 | -0.14854900 |
| H         | 4.14560300  | 0.05926000  | -1.61995300 |
| C         | 1.94393700  | -1.91166100 | -2.30661600 |
| H         | 0.96147300  | -2.17551900 | -2.70246800 |
| H         | 2.66081700  | -1.82130500 | -3.12520200 |
| H         | 2.26562100  | -2.64758200 | -1.56865500 |
| B         | -2.12119300 | -1.95468500 | 0.00666600  |
| H         | -1.78080000 | -3.06971300 | 0.21579900  |
| B         | -1.92866300 | -1.21769800 | -1.59382200 |
| H         | -1.45754000 | -1.83053800 | -2.49471800 |
| B         | -1.42564700 | 0.46918800  | -1.36958200 |
| H         | -0.61712100 | 0.99096900  | -2.04656200 |
| B         | -3.55283900 | -1.37082600 | -0.88373300 |
| H         | -4.35337900 | -2.12809000 | -1.32685000 |
| B         | -3.09666000 | 0.13794300  | -1.73744100 |
| H         | -3.53727300 | 0.45548600  | -2.79308700 |
| B         | 0.64012900  | -0.58490500 | 0.06967200  |
| C         | 0.05555500  | 1.81482300  | 2.45835000  |
| H         | 0.28143600  | 2.87193200  | 2.39617800  |
| H         | -0.89409300 | 1.54028300  | 2.90337500  |
| C         | 1.04240900  | 0.84307200  | 2.30514300  |
| H         | 0.89586500  | -0.15559700 | 2.69239400  |
| H         | 2.07003500  | 1.11437900  | 2.08525500  |
| <b>TS</b> |             |             |             |
| Br        | 0.98396100  | 2.71617800  | -0.26310400 |
| C         | -1.33914200 | 0.69299900  | 0.34656500  |
| B         | -2.66854500 | 1.38225500  | -0.48826100 |

|    |             |             |             |
|----|-------------|-------------|-------------|
| H  | -2.71740800 | 2.55696100  | -0.62384600 |
| B  | -2.88406100 | 0.63081800  | 1.10120400  |
| H  | -3.07134600 | 1.29697900  | 2.06336700  |
| B  | -1.75183400 | -0.72297100 | 1.22653000  |
| H  | -1.13672100 | -0.96865400 | 2.20285800  |
| B  | -4.01527500 | 0.23749600  | -0.21082500 |
| H  | -5.14092100 | 0.61465600  | -0.18513400 |
| B  | -3.42531900 | -1.06248900 | 0.86671800  |
| H  | -4.09997800 | -1.60940900 | 1.67587300  |
| B  | 0.14247600  | 1.18304200  | 0.80726100  |
| Br | 1.43313200  | -2.17603400 | 1.05387700  |
| S  | 1.77669400  | -0.23030400 | -1.51356700 |
| C  | -0.92442600 | -0.76023800 | -0.28556000 |
| C  | 3.42634200  | -0.01653600 | -0.77080200 |
| H  | 3.37963400  | 0.90378800  | -0.18728000 |
| H  | 3.66259200  | -0.87174200 | -0.13632400 |
| H  | 4.14929400  | 0.09724400  | -1.58034300 |
| C  | 1.95078300  | -1.85538000 | -2.32925800 |
| H  | 0.96680900  | -2.11362200 | -2.72508100 |
| H  | 2.66124700  | -1.73933600 | -3.15021900 |
| H  | 2.28129600  | -2.60881000 | -1.61335300 |
| B  | -2.12133300 | -1.94786400 | -0.00077600 |
| H  | -1.78001000 | -3.06366200 | 0.20207400  |
| B  | -1.92413100 | -1.20242700 | -1.59677900 |
| H  | -1.45009700 | -1.81097700 | -2.49906100 |
| B  | -1.42175400 | 0.48304500  | -1.36282300 |
| H  | -0.61078500 | 1.00740200  | -2.03494000 |
| B  | -3.55015700 | -1.35923900 | -0.89163400 |
| H  | -4.34913400 | -2.11443000 | -1.34106800 |
| B  | -3.09167500 | 0.15386900  | -1.73576800 |
| H  | -3.52957600 | 0.47744700  | -2.79069300 |
| B  | 0.63978400  | -0.59836300 | 0.07267200  |
| C  | 0.09207200  | 1.77564400  | 2.46244600  |
| H  | 0.35593600  | 2.82604100  | 2.45905100  |
| H  | -0.84503200 | 1.50819400  | 2.93826800  |
| C  | 1.06255200  | 0.77842900  | 2.27743200  |
| H  | 0.90441200  | -0.21798700 | 2.66447400  |
| H  | 2.09443500  | 1.03434000  | 2.05885600  |

**INT2**

|    |             |             |             |
|----|-------------|-------------|-------------|
| Br | -1.28175200 | 3.74619900  | 1.21731400  |
| C  | -1.56421100 | 0.89087900  | 0.39404500  |
| B  | -2.78752400 | 1.26294800  | -0.75634600 |
| H  | -2.90087400 | 2.39430300  | -1.07901100 |
| B  | -3.20197300 | 0.74395600  | 0.88422800  |
| H  | -3.59354500 | 1.53054300  | 1.67601200  |
| B  | -1.96107100 | -0.43111500 | 1.42321500  |
| H  | -1.52724300 | -0.43493700 | 2.52068300  |
| B  | -4.04756300 | 0.03838700  | -0.51280400 |
| H  | -5.18702700 | 0.29243600  | -0.72594200 |
| B  | -3.53703400 | -0.99724300 | 0.85763500  |
| H  | -4.29548600 | -1.48991300 | 1.62645900  |
| B  | -0.61921400 | 1.94978900  | 1.06727300  |
| Br | 1.22785900  | -2.72673400 | 0.72965800  |
| S  | 1.89481000  | -0.06007200 | -1.06701500 |
| C  | -0.86947800 | -0.62236600 | 0.09190200  |
| C  | 3.57863100  | -0.46602900 | -0.49808800 |
| H  | 3.82451500  | 0.21229400  | 0.31916500  |
| H  | 3.61466400  | -1.50186800 | -0.15608900 |
| H  | 4.26435700  | -0.29406400 | -1.32976600 |
| C  | 1.73834600  | -1.22461900 | -2.45951800 |
| H  | 0.79742500  | -1.00618800 | -2.96222700 |
| H  | 2.57399400  | -1.04912000 | -3.13965300 |
| H  | 1.73969500  | -2.24890700 | -2.08186900 |
| B  | -2.05255200 | -1.84979800 | 0.36382400  |
| H  | -1.69028200 | -2.89021400 | 0.78264600  |
| B  | -1.62053400 | -1.32363000 | -1.26842600 |
| H  | -0.96049400 | -2.02198600 | -1.95840300 |
| B  | -1.29406900 | 0.42388300  | -1.22659900 |
| H  | -0.43024000 | 0.95970200  | -1.83016800 |
| B  | -3.33129900 | -1.55927100 | -0.83266600 |
| H  | -3.95117000 | -2.46632000 | -1.28237000 |
| B  | -2.84898800 | -0.15254500 | -1.82929900 |
| H  | -3.11286900 | -0.04213800 | -2.98247200 |
| B  | 0.70918400  | -0.77922000 | 0.49729700  |
| C  | 0.81425200  | 1.62057700  | 1.59670600  |



|   |            |             |            |
|---|------------|-------------|------------|
| H | 1.48952000 | 2.11195300  | 0.87372700 |
| H | 0.99079000 | 2.16817300  | 2.53132400 |
| C | 1.16989900 | 0.12307700  | 1.73886300 |
| H | 0.66474000 | -0.28758000 | 2.61986100 |
| H | 2.23792500 | -0.00047500 | 1.94988600 |

**3a**

|    |            |             |             |
|----|------------|-------------|-------------|
| Br | 5.08688800 | 10.83836200 | 10.79440700 |
| Br | 5.55026200 | 11.81354200 | 16.88346300 |
| S  | 8.12929400 | 10.58270100 | 12.00754400 |
| S  | 2.53908500 | 11.11403600 | 15.76763800 |
| C  | 5.80412900 | 9.36280700  | 13.40086600 |
| C  | 4.91671900 | 9.58368700  | 14.85666300 |
| C  | 6.02350400 | 12.08447200 | 13.36506100 |
| H  | 6.79972700 | 12.16982600 | 14.13909500 |
| H  | 6.14808600 | 12.93610500 | 12.68687600 |
| C  | 4.63731400 | 12.17918200 | 14.04426800 |
| H  | 3.86272300 | 12.01360000 | 13.28163200 |
| H  | 4.49720900 | 13.19495900 | 14.43055200 |
| C  | 8.21308800 | 9.45803800  | 10.57207700 |
| H  | 8.02523800 | 8.44757200  | 10.93219700 |
| H  | 7.44987200 | 9.74700400  | 9.84810300  |
| H  | 9.21767700 | 9.52496600  | 10.14980400 |
| C  | 8.38464300 | 12.17411000 | 11.15521800 |
| H  | 8.39569100 | 12.95587400 | 11.91491200 |
| H  | 9.35258000 | 12.13738700 | 10.65202600 |
| H  | 7.57317000 | 12.34347900 | 10.44421800 |
| C  | 2.22174600 | 12.88679300 | 16.05195000 |
| H  | 2.20161600 | 13.37829800 | 15.07912200 |
| H  | 1.24596100 | 12.98356500 | 16.53165400 |
| H  | 3.01380800 | 13.30611300 | 16.67620900 |
| C  | 2.44662100 | 10.51360400 | 17.48877100 |
| H  | 2.71266500 | 9.45754600  | 17.48330700 |
| H  | 3.15365600 | 11.07451700 | 18.10142700 |
| H  | 1.41942200 | 10.64108700 | 17.83588300 |
| B  | 4.15707300 | 8.89333400  | 13.46807700 |
| H  | 3.35448000 | 9.53997000  | 12.89646300 |
| B  | 5.38378500 | 7.87433100  | 12.67400700 |

|   |            |             |             |
|---|------------|-------------|-------------|
| H | 5.40188000 | 7.83103100  | 11.49179500 |
| B | 6.87642700 | 8.04322100  | 13.60225400 |
| H | 7.93767200 | 8.09320000  | 13.07956200 |
| B | 6.57648400 | 9.16957800  | 14.93461600 |
| H | 7.35553700 | 9.98766200  | 15.27074700 |
| B | 3.88718000 | 8.23447200  | 15.08805800 |
| H | 2.82407600 | 8.41551100  | 15.57695400 |
| B | 4.16624300 | 7.13406200  | 13.73139300 |
| H | 3.28914100 | 6.46500800  | 13.29415400 |
| B | 5.86955300 | 6.60520400  | 13.82384700 |
| H | 6.22817100 | 5.54103200  | 13.43447300 |
| B | 6.62436700 | 7.41610700  | 15.23636000 |
| H | 7.52006300 | 6.94640400  | 15.85703300 |
| B | 5.37889900 | 8.41151500  | 16.01375500 |
| H | 5.35499100 | 8.73841600  | 17.15061400 |
| B | 4.93979700 | 6.83040700  | 15.32278300 |
| H | 4.61322100 | 5.93189400  | 16.02884800 |
| B | 6.16045500 | 10.71135400 | 12.55418800 |
| B | 4.51531100 | 11.11925700 | 15.23757600 |

**BH<sub>3</sub>**

|   |             |             |            |
|---|-------------|-------------|------------|
| B | 0.00000000  | 0.00000000  | 0.00000000 |
| H | 0.00000000  | 1.19332400  | 0.00000000 |
| H | 1.03344900  | -0.59666200 | 0.00000000 |
| H | -1.03344900 | -0.59666200 | 0.00000000 |

**1-(BH<sub>2</sub>BH)-2-BH<sub>2</sub>-1,2-C<sub>2</sub>B<sub>10</sub>H<sub>10</sub>**

|   |             |             |             |
|---|-------------|-------------|-------------|
| B | -0.86344100 | 1.40710400  | 0.88599700  |
| B | -2.23345300 | 0.69960900  | 0.00127700  |
| B | -0.55233000 | -1.47330300 | 0.88310100  |
| B | -2.04356400 | -1.06613300 | 0.00054200  |
| B | -0.55345900 | -1.47271300 | -0.88415700 |
| B | 0.19448300  | 0.05913500  | -1.43921600 |
| B | -1.56778200 | -0.12440300 | 1.45731100  |
| B | 0.19620800  | 0.05821800  | 1.43800800  |
| H | -0.80570800 | 2.42646300  | 1.48551600  |
| H | -3.29456200 | 1.23001500  | 0.00203500  |

|   |             |             |             |
|---|-------------|-------------|-------------|
| H | -0.28896500 | -2.45806800 | 1.48438300  |
| H | -2.96895300 | -1.80854900 | 0.00096500  |
| H | -0.29109800 | -2.45724700 | -1.48623300 |
| H | 0.95792300  | 0.14636700  | -2.33871300 |
| H | -2.14424200 | -0.18628400 | 2.49188900  |
| H | 0.96066800  | 0.14494100  | 2.33663700  |
| B | -0.86445700 | 1.40758500  | -0.88471600 |
| H | -0.80766800 | 2.42722100  | -1.48386500 |
| B | -1.56970300 | -0.12341600 | -1.45617800 |
| H | -2.14777200 | -0.18449300 | -2.48990300 |
| C | 0.71032400  | -0.73941000 | -0.00140200 |
| C | 0.51949100  | 0.94296200  | -0.00042000 |
| B | 2.18192600  | -1.28641600 | -0.00037700 |
| H | 2.27244900  | -2.47823200 | 0.00010300  |
| B | 1.79908300  | 1.80854500  | -0.00042600 |
| H | 1.74767900  | 2.99296500  | 0.00095300  |
| H | 2.89746300  | 1.30603500  | -0.00214400 |
| B | 3.53358900  | -0.32371400 | 0.00039400  |
| H | 4.12334400  | -0.08584300 | 1.01746000  |
| H | 4.12505500  | -0.08709200 | -1.01594600 |

## NMR Spectra

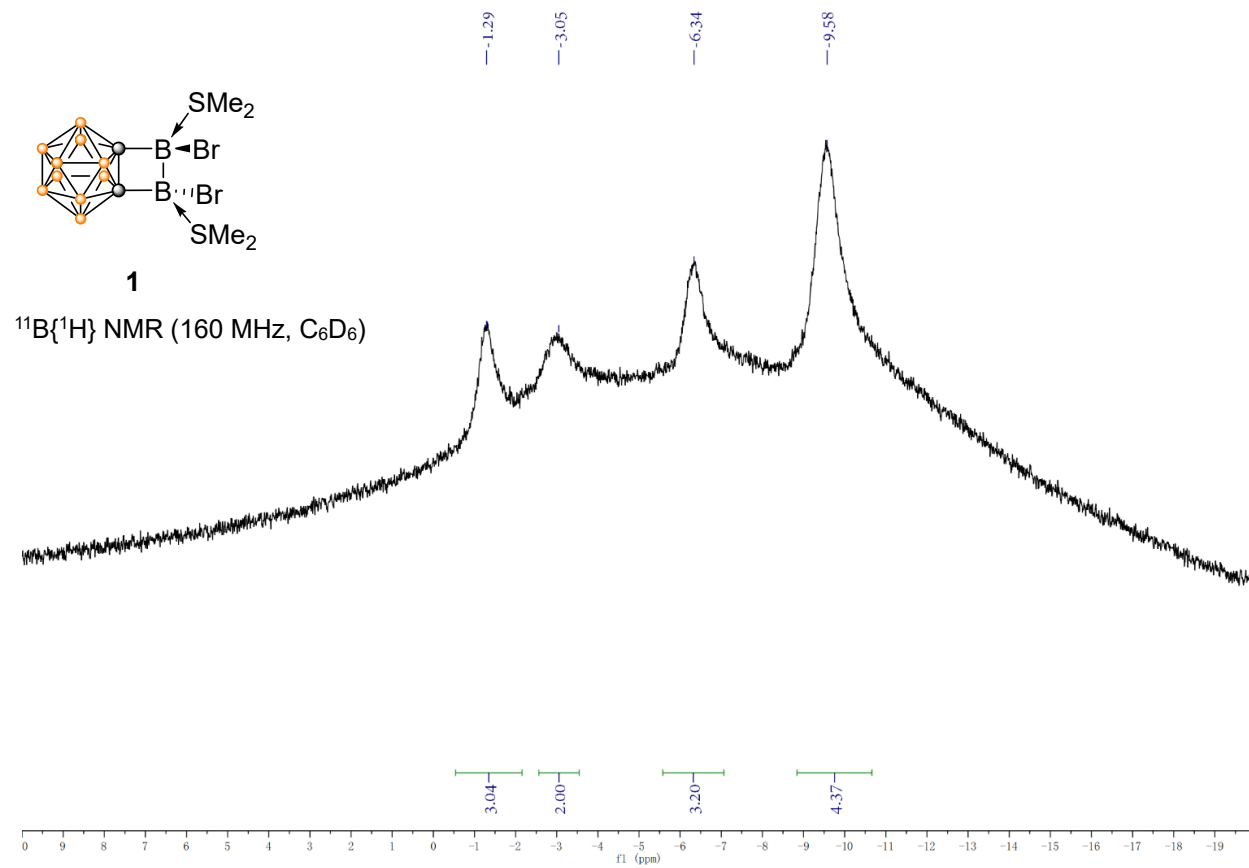

**Figure S4.** <sup>11</sup>B{<sup>1</sup>H} NMR spectrum of compound **1**.

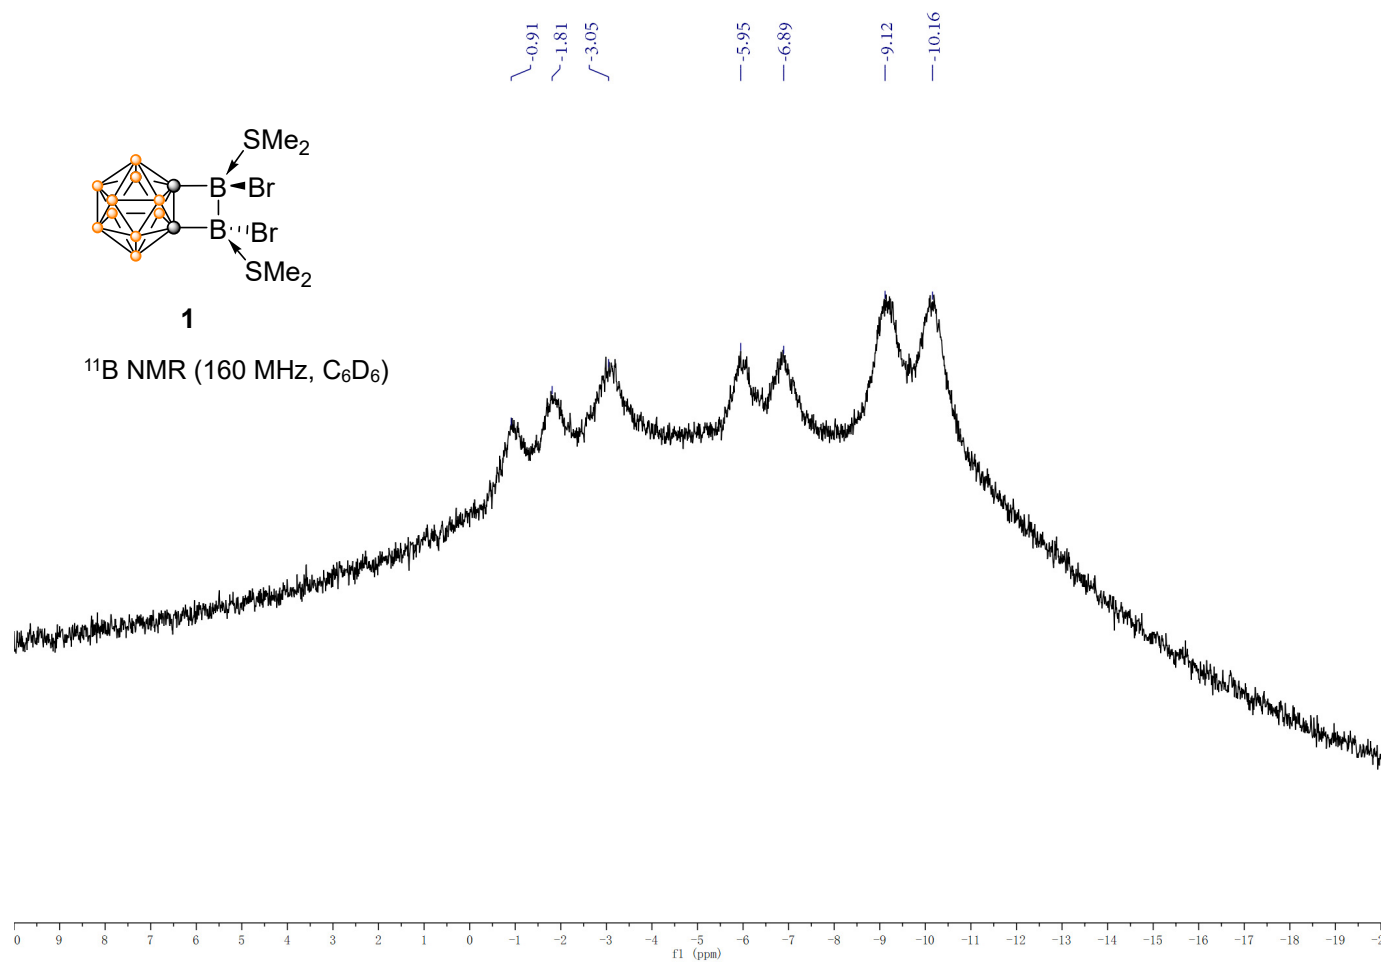

**Figure S5.** <sup>11</sup>B NMR spectrum of compound **1**.

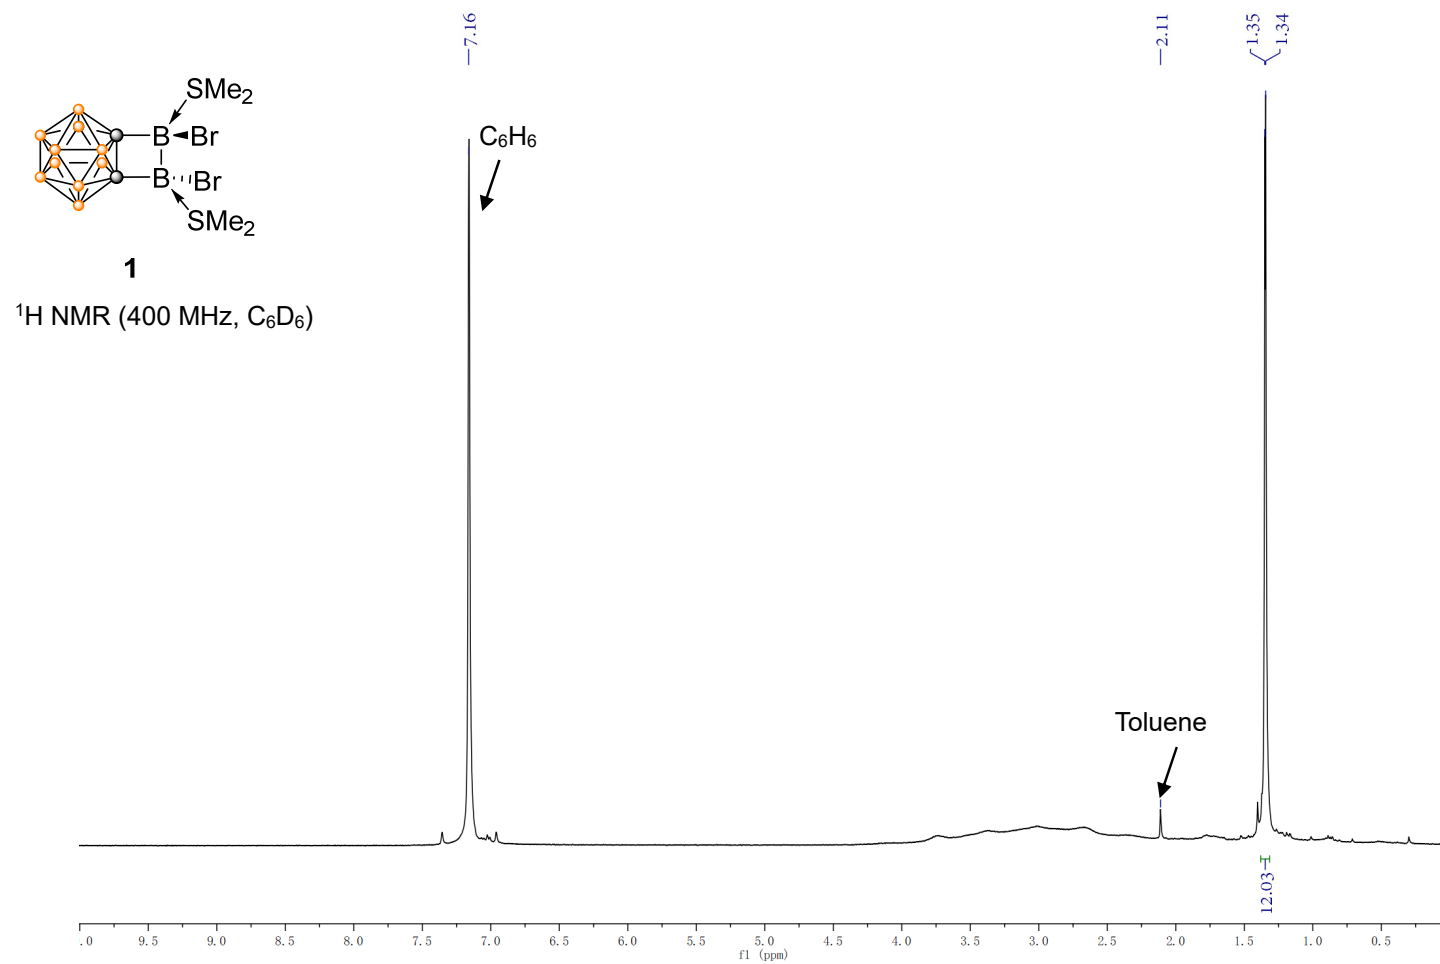

**Figure S6.**  $^1\text{H NMR}$  spectrum of compound **1**.

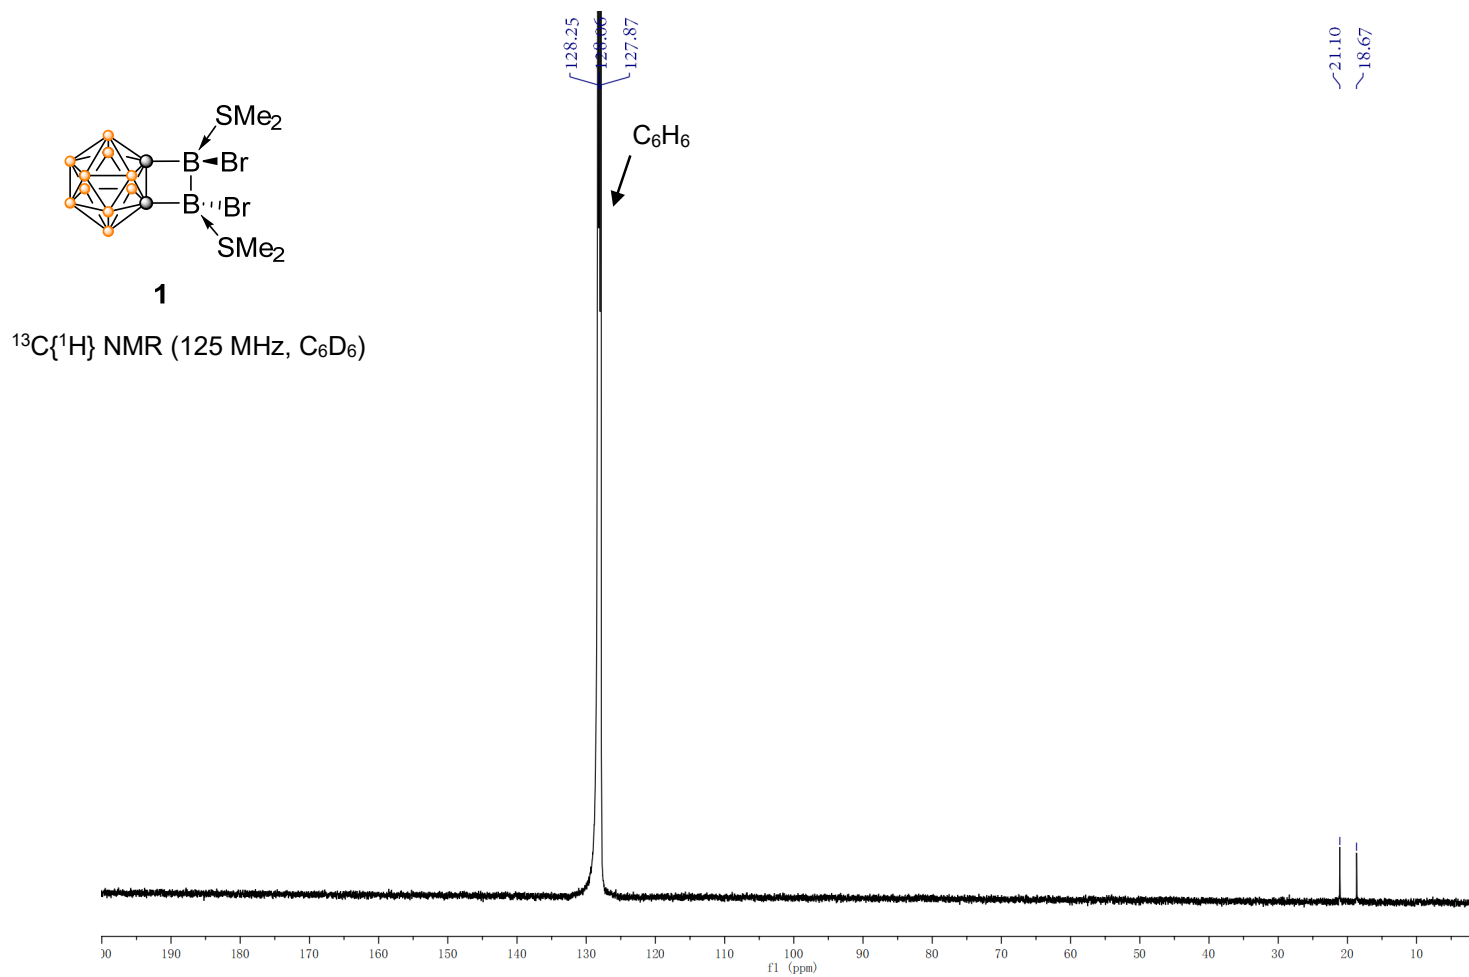

**Figure S7.**  $^{13}\text{C}\{^1\text{H}\}$  NMR spectrum of compound **1**.

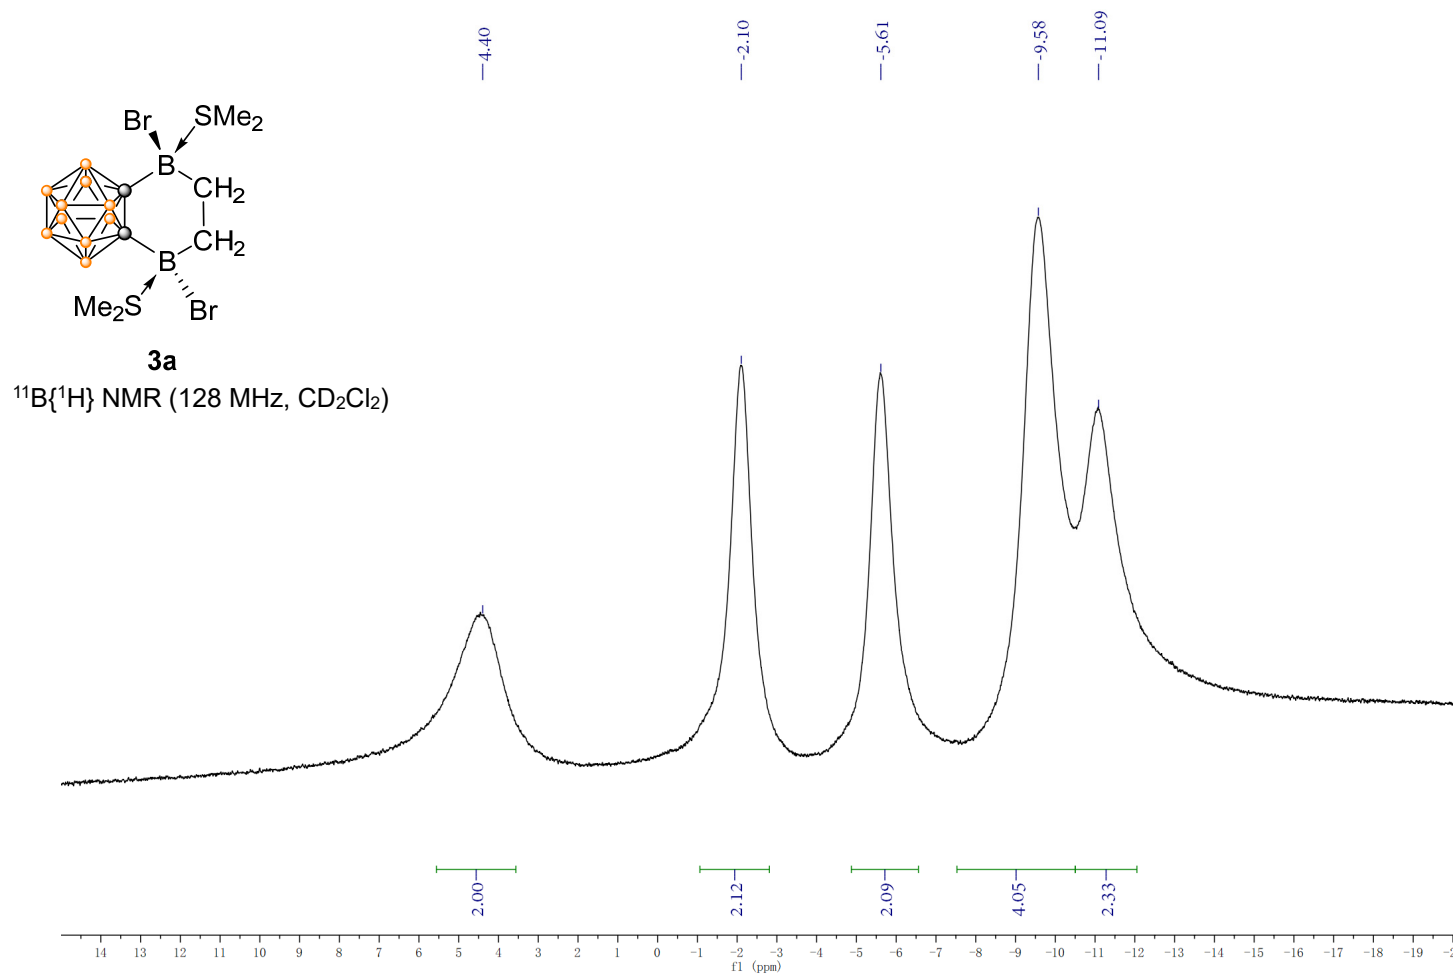

**Figure S8.**  $^{11}\text{B}\{^1\text{H}\}$  NMR spectrum of compound **3a**.



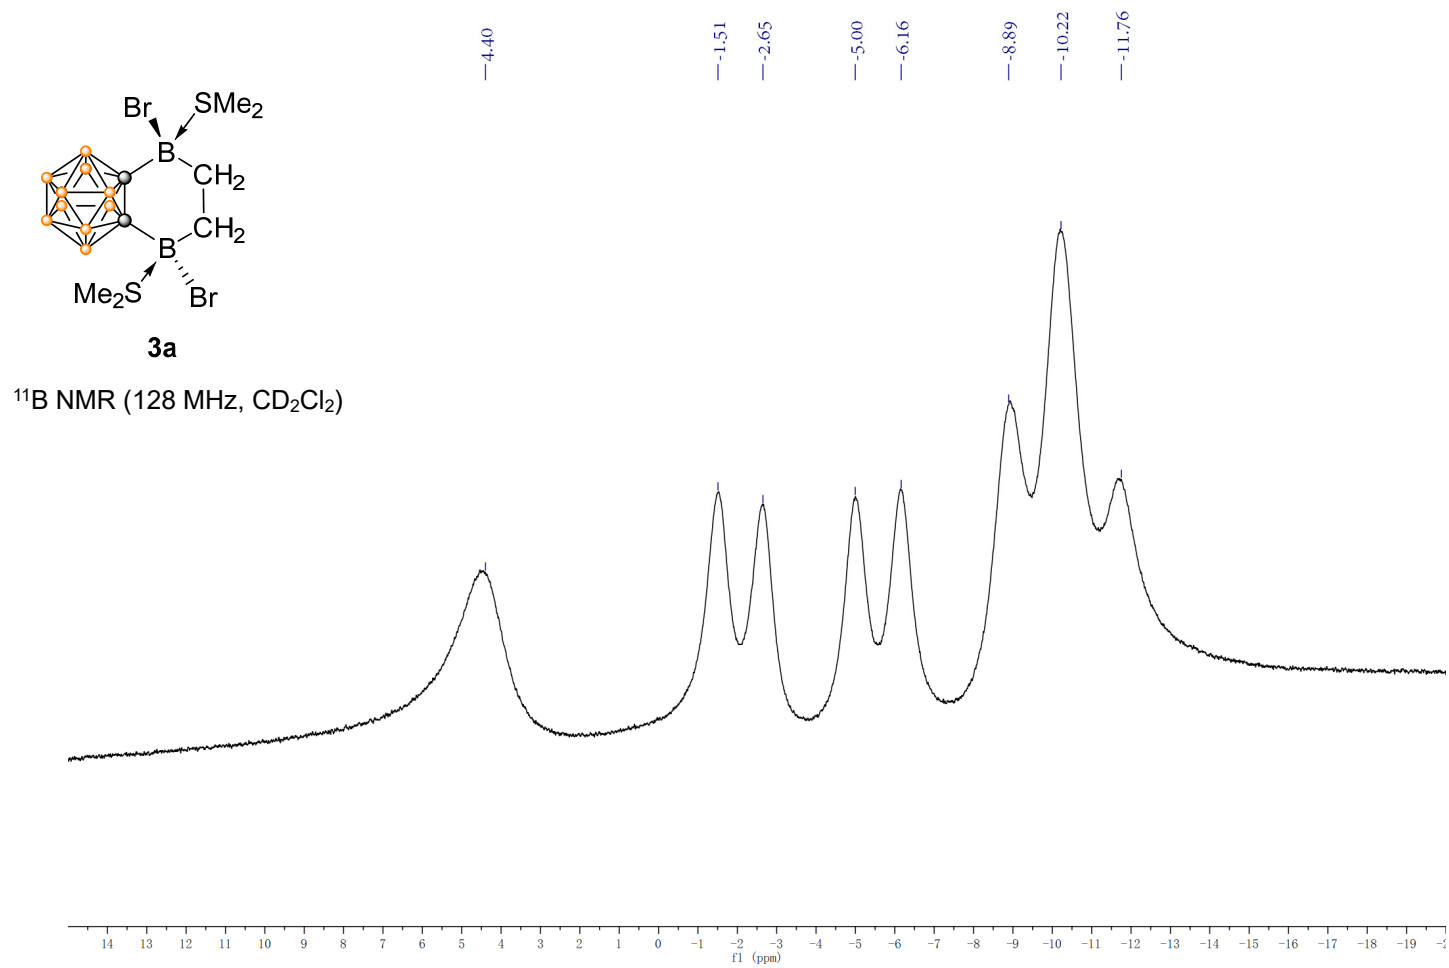

**Figure S9.**  $^{11}\text{B}$  NMR spectrum of compound **3a**.

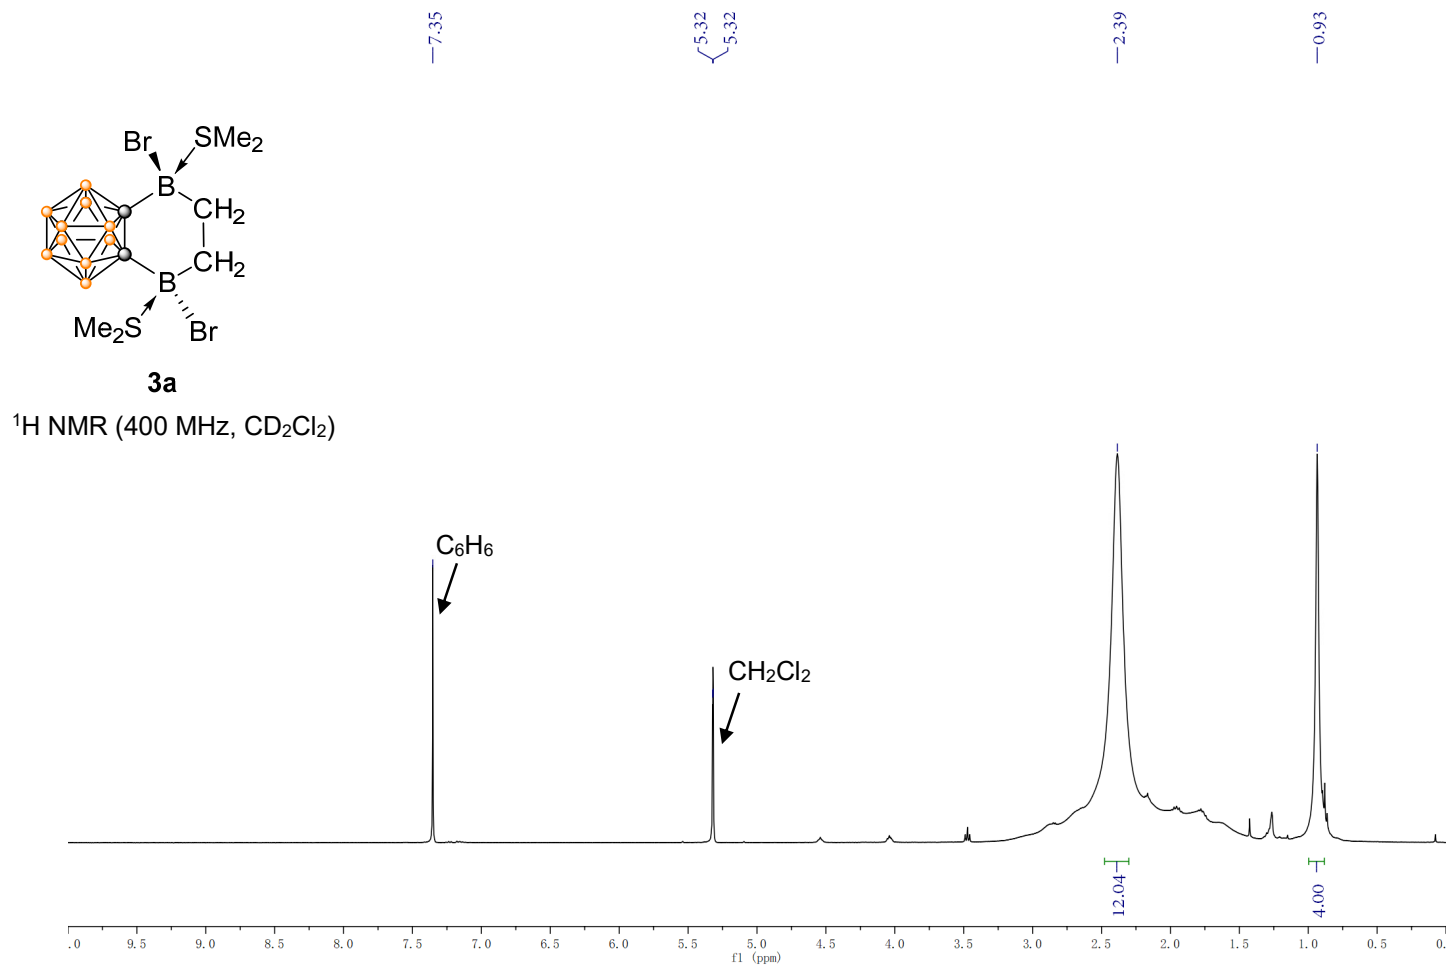

**Figure S10.**  $^1\text{H}$  NMR spectrum of compound **3a**.

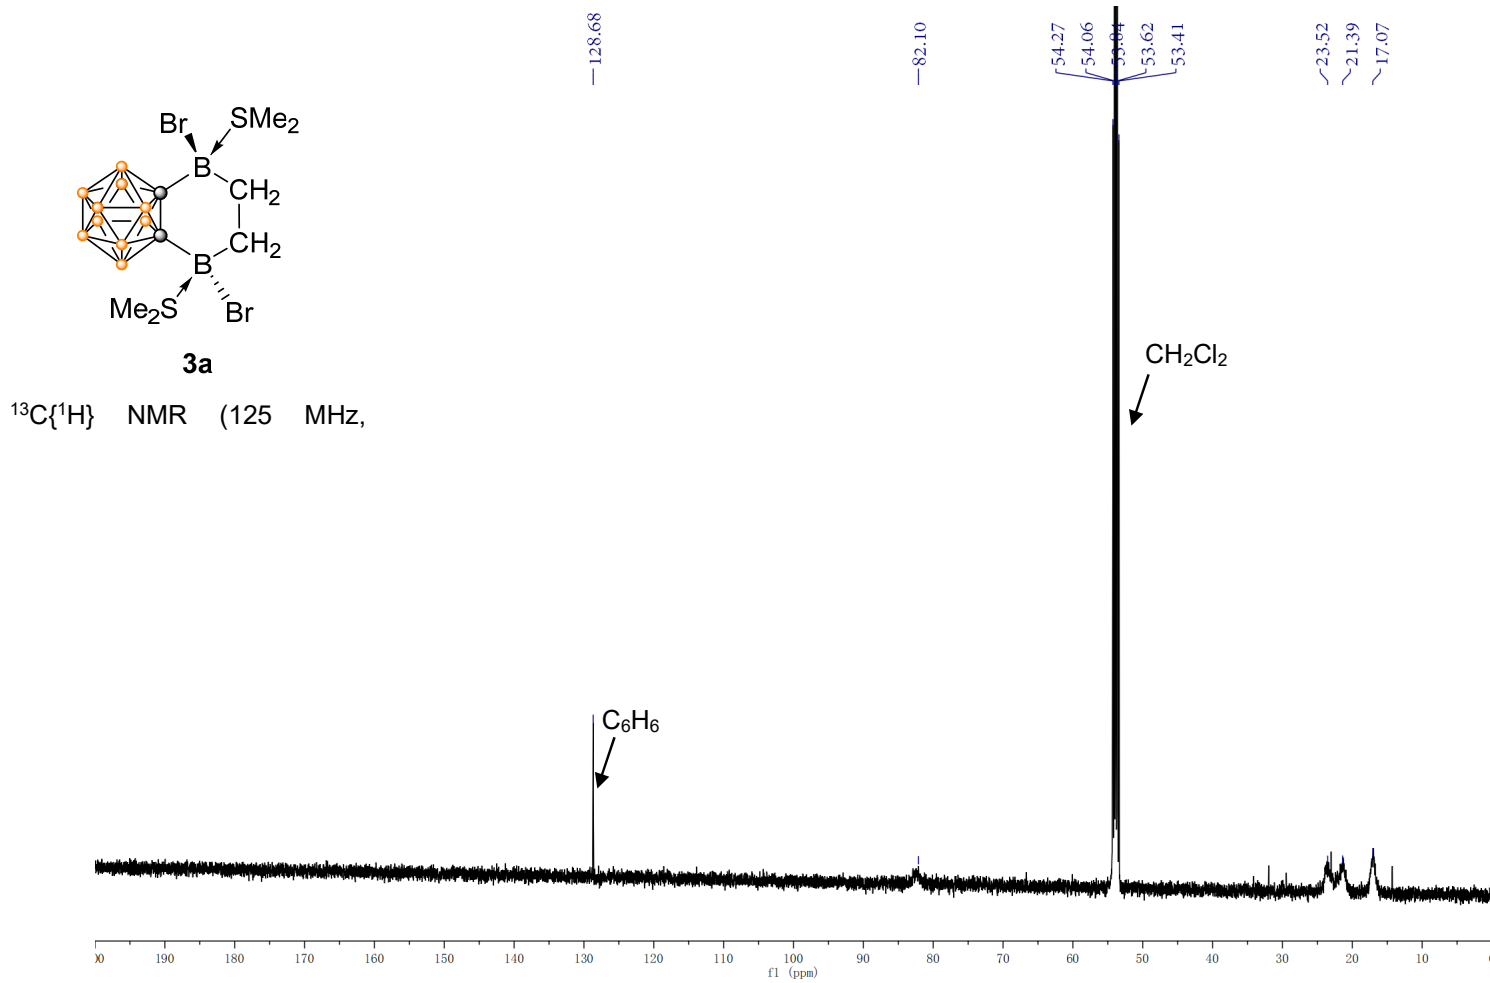

Figure S11.  $^{13}\text{C}\{^1\text{H}\}$  NMR spectrum of compound **3a**.

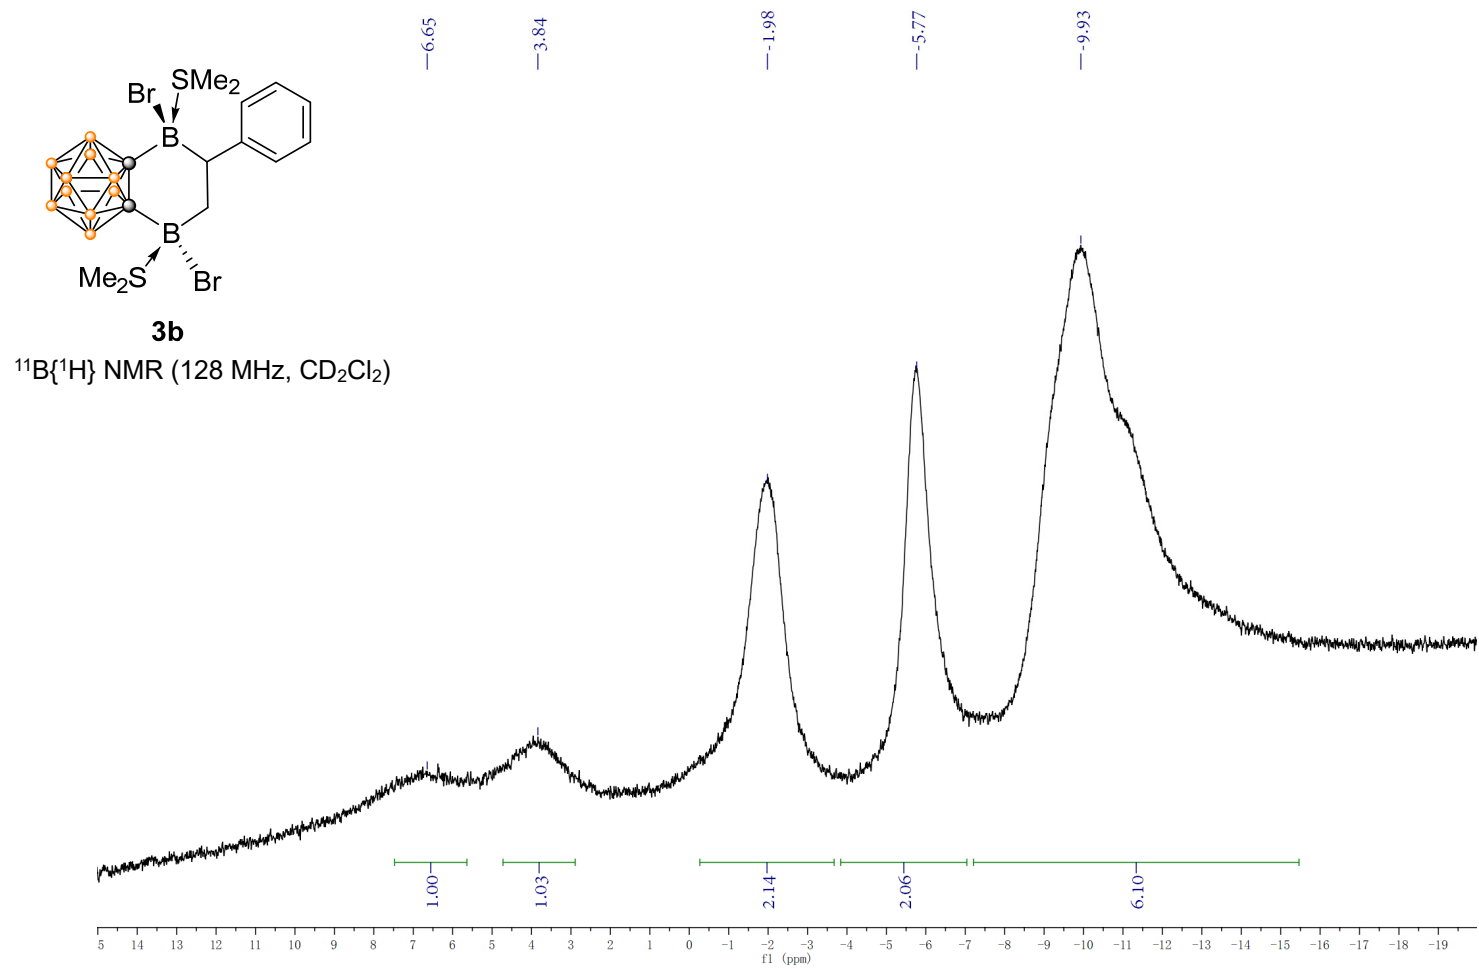

**Figure S12.**  $^{11}\text{B}\{^1\text{H}\}$  NMR spectrum of compound **3b**.

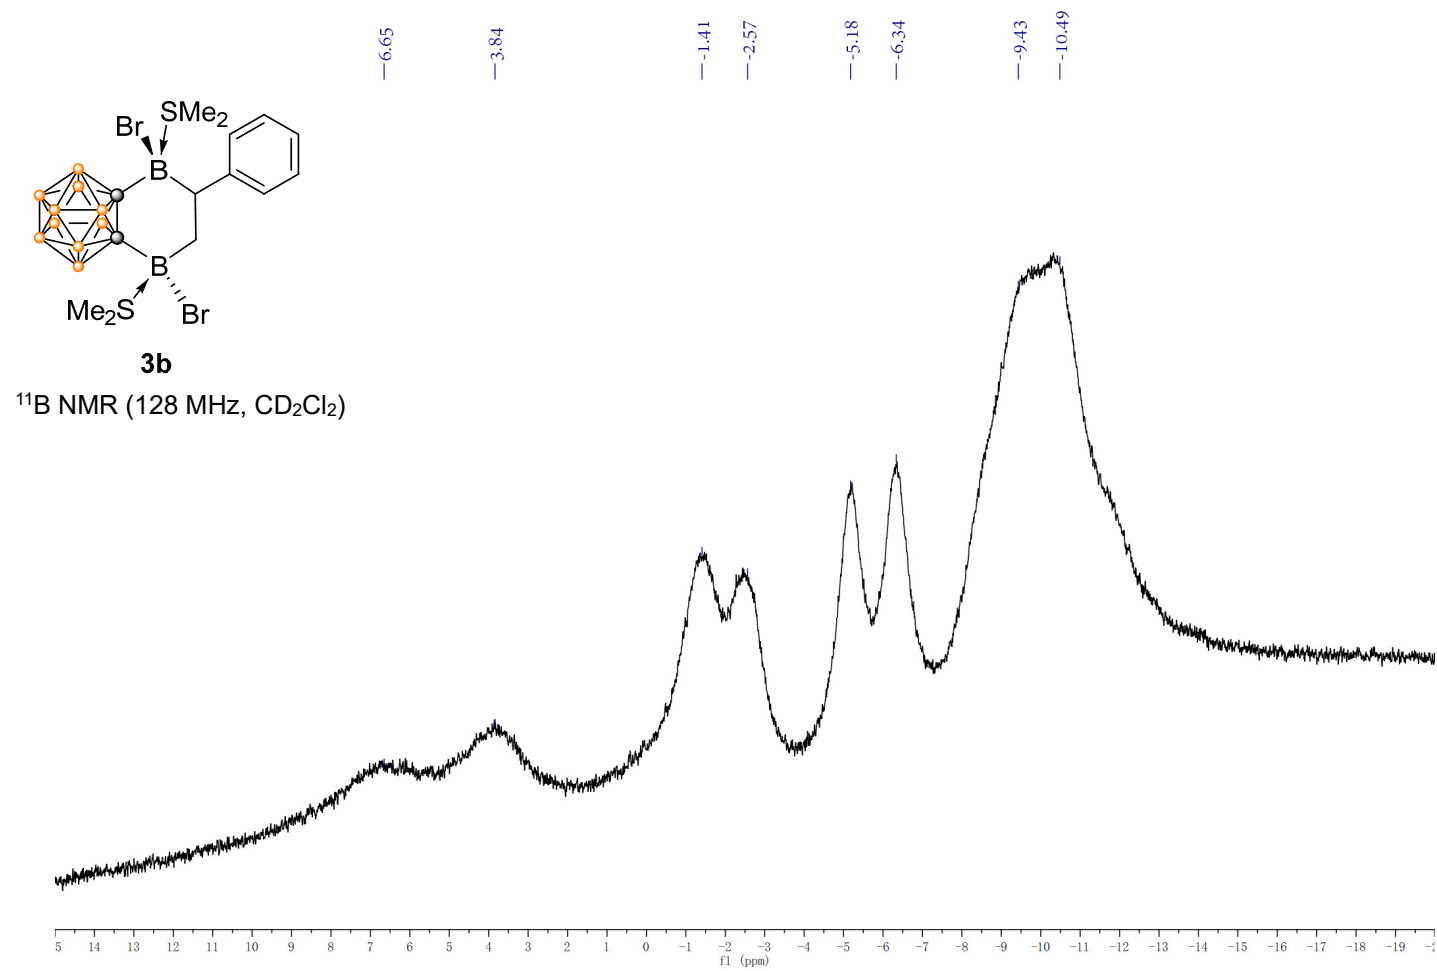

**Figure S13.** <sup>11</sup>B NMR spectrum of compound **3b**.

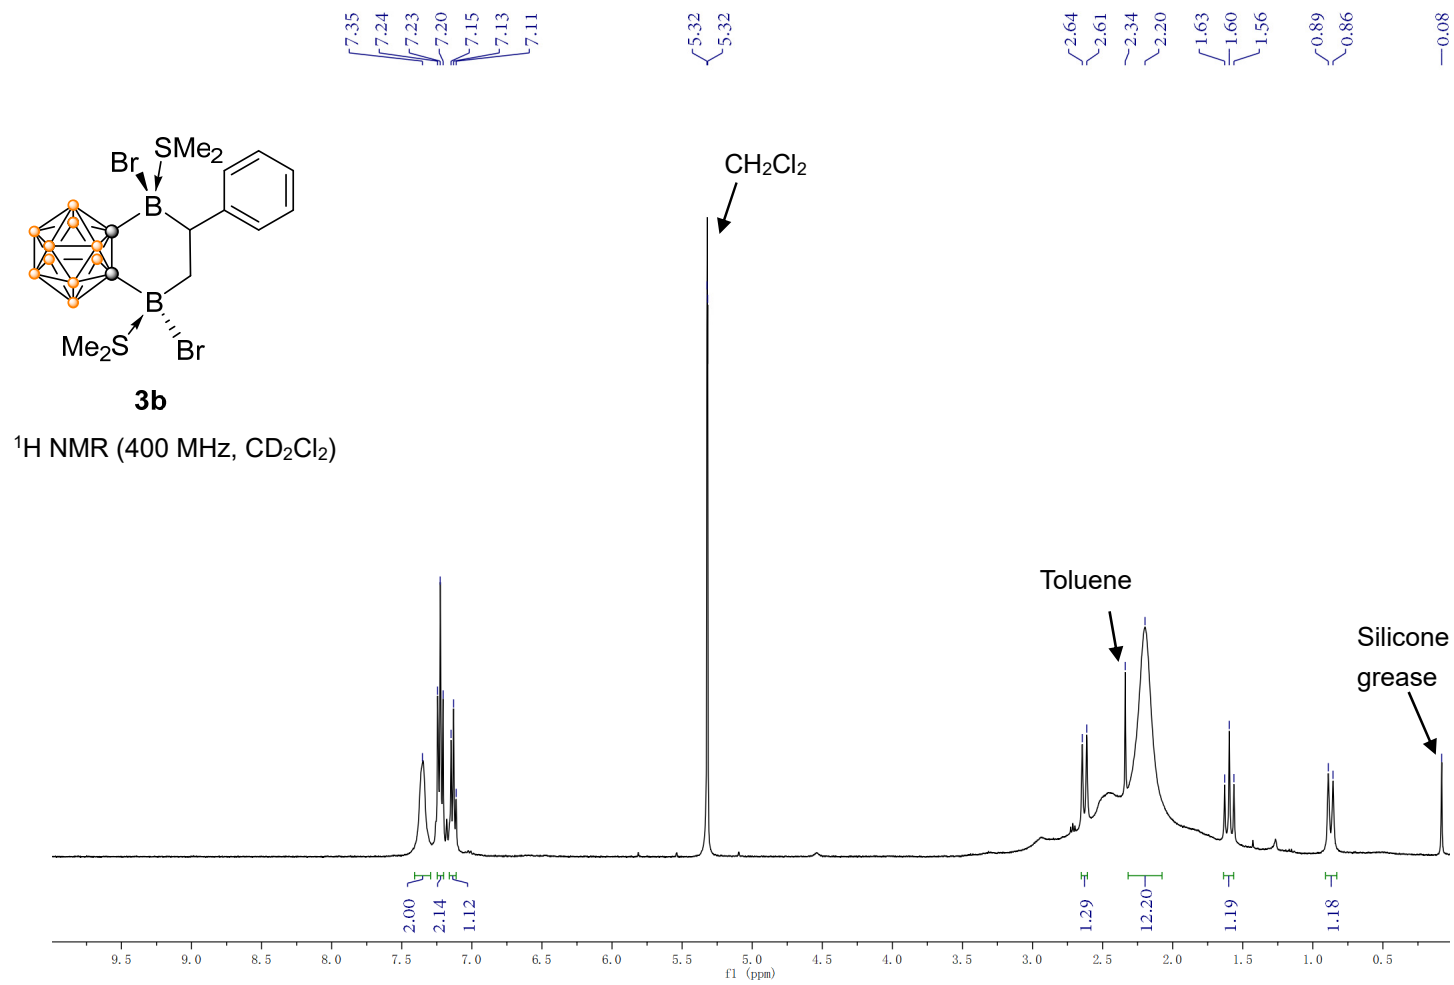

**Figure S14.** <sup>1</sup>H NMR spectrum of compound **3b**.

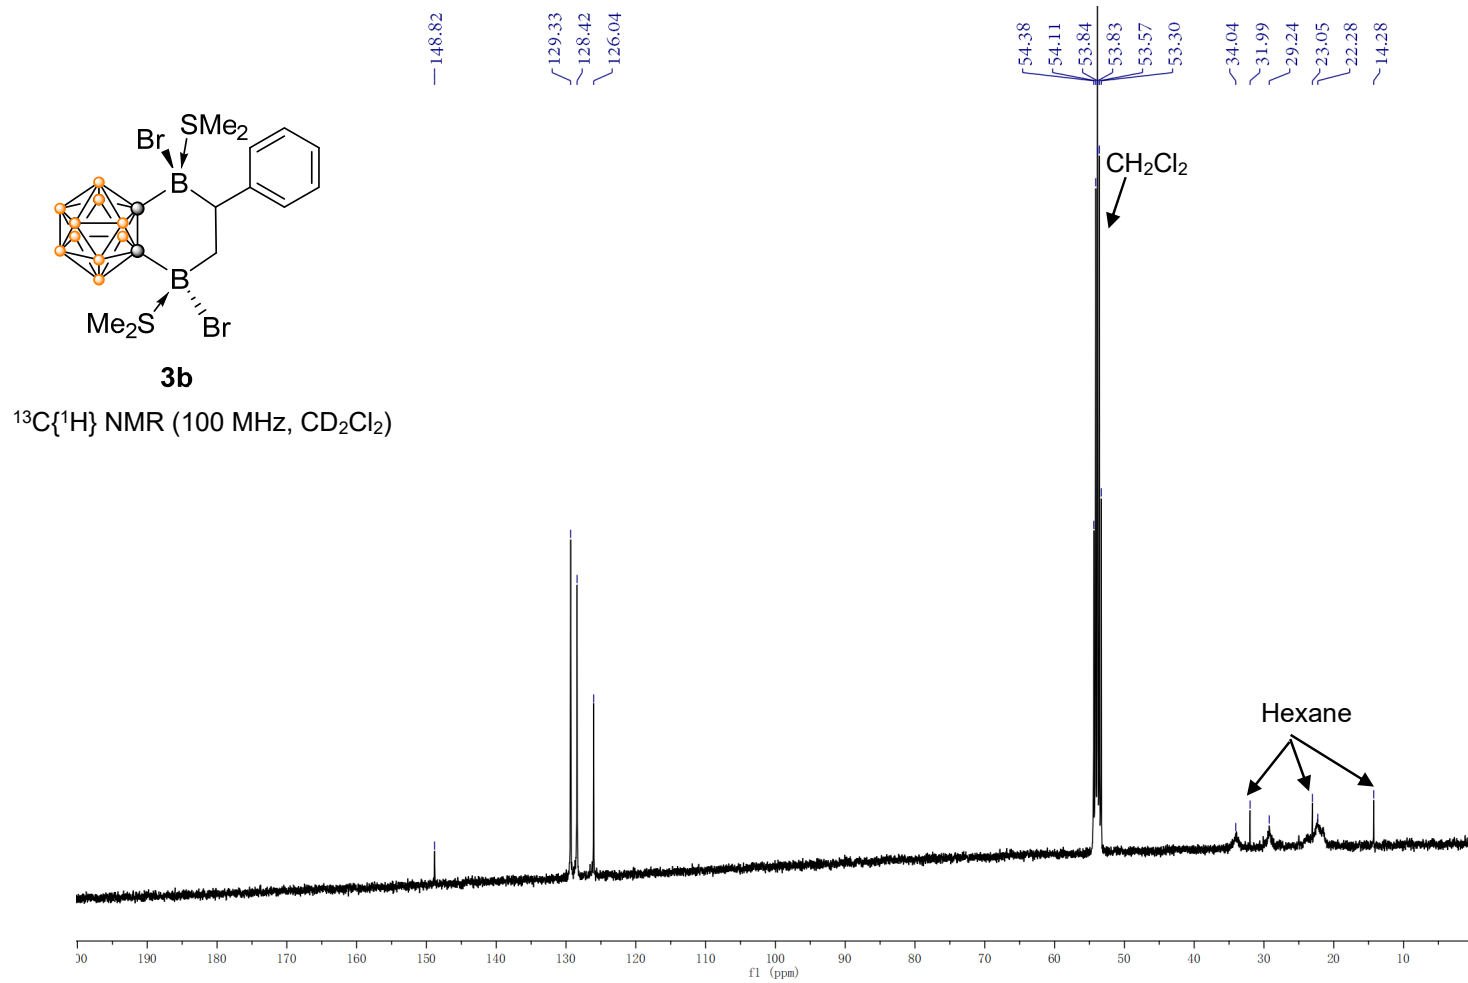

Figure S15.  $^{13}\text{C}\{^1\text{H}\}$  NMR spectrum of compound **3b**.

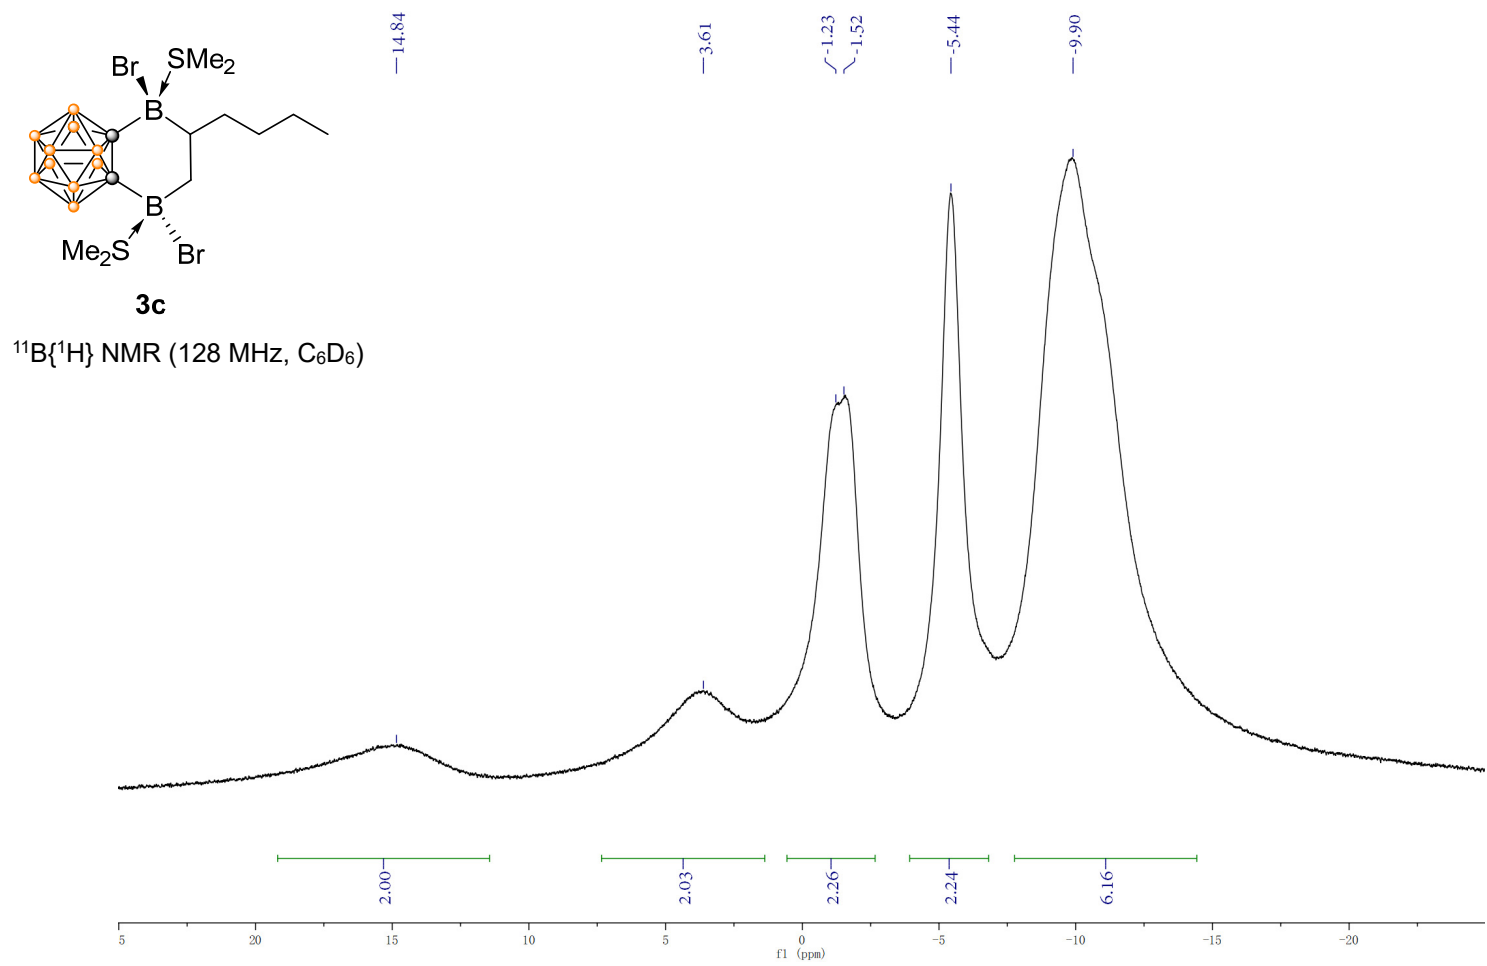

**Figure S16.**  $^{11}\text{B}\{^1\text{H}\}$  NMR spectrum of compound **3c**.



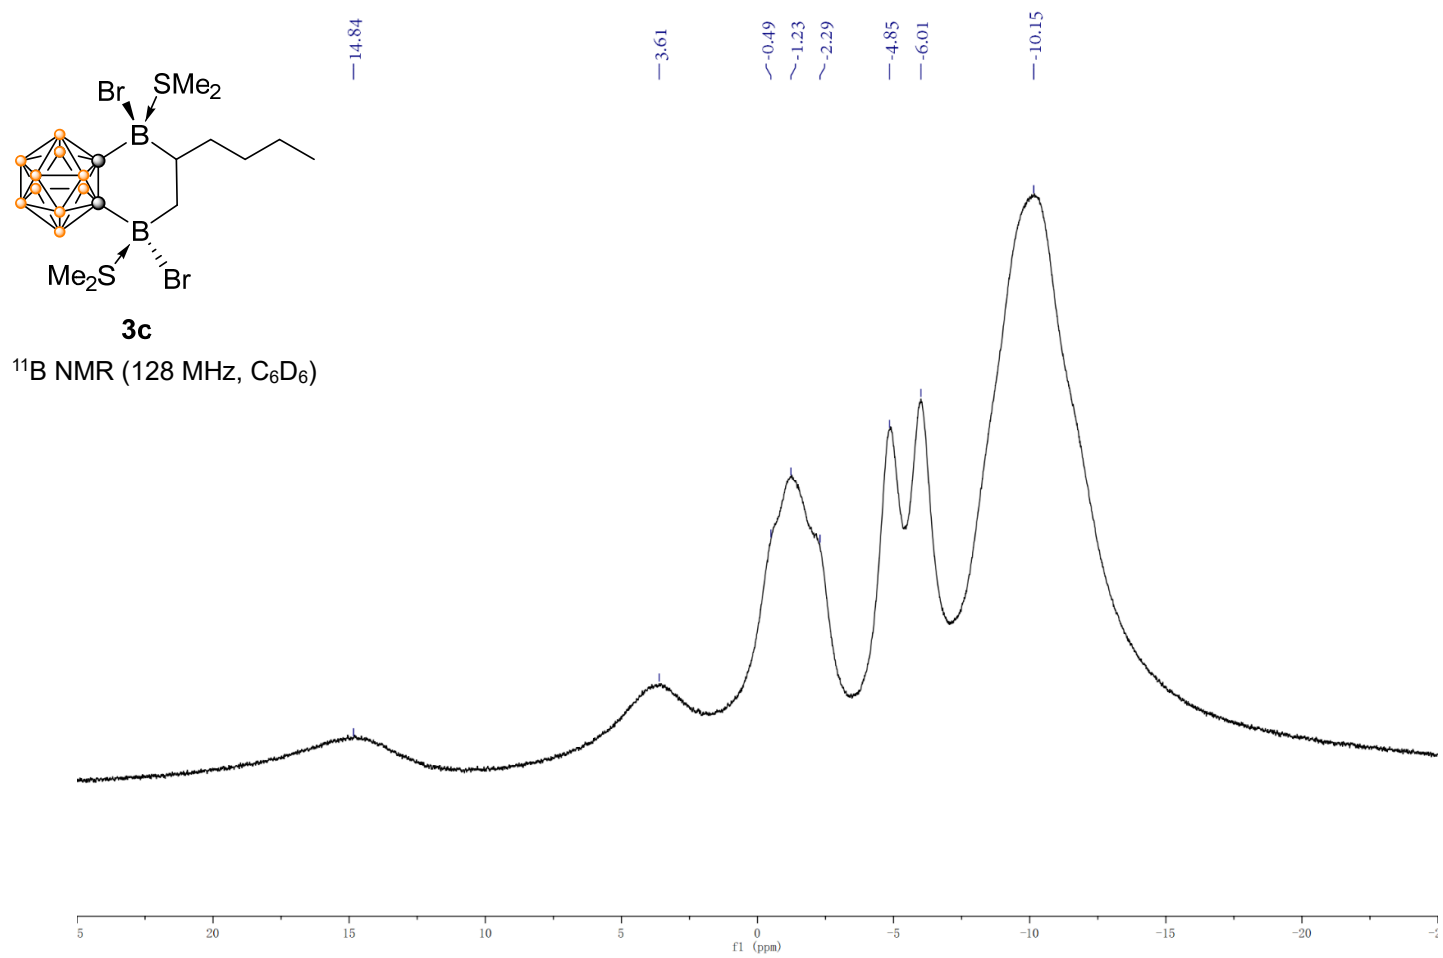

**Figure S17.**  $^{11}\text{B}$  NMR spectrum of compound **3c**.

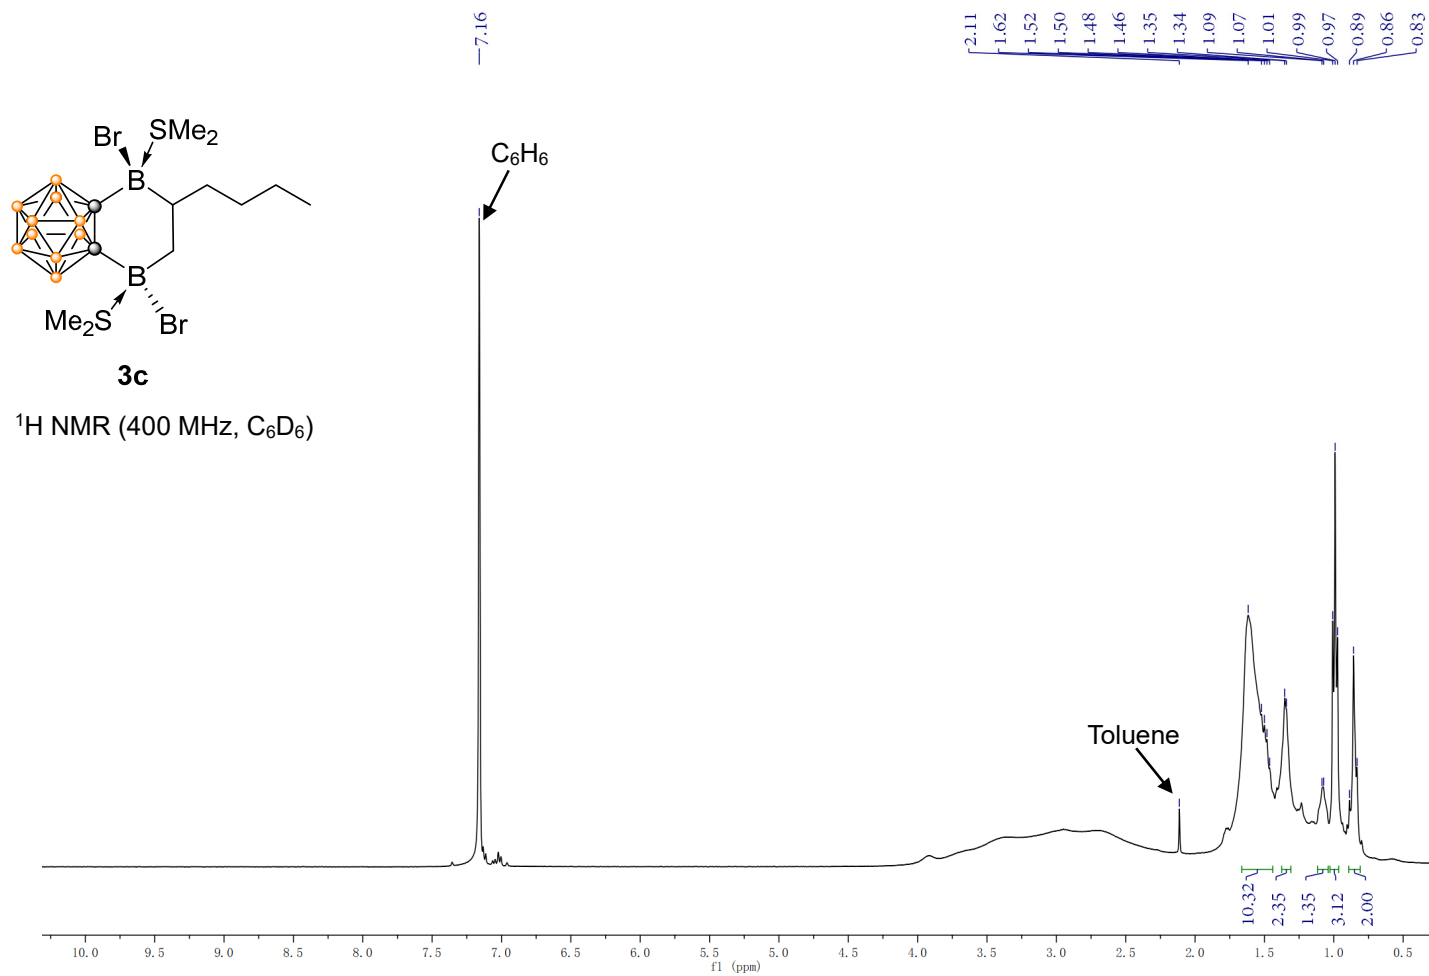

**Figure S18.** <sup>1</sup>H NMR spectrum of compound **3c**.

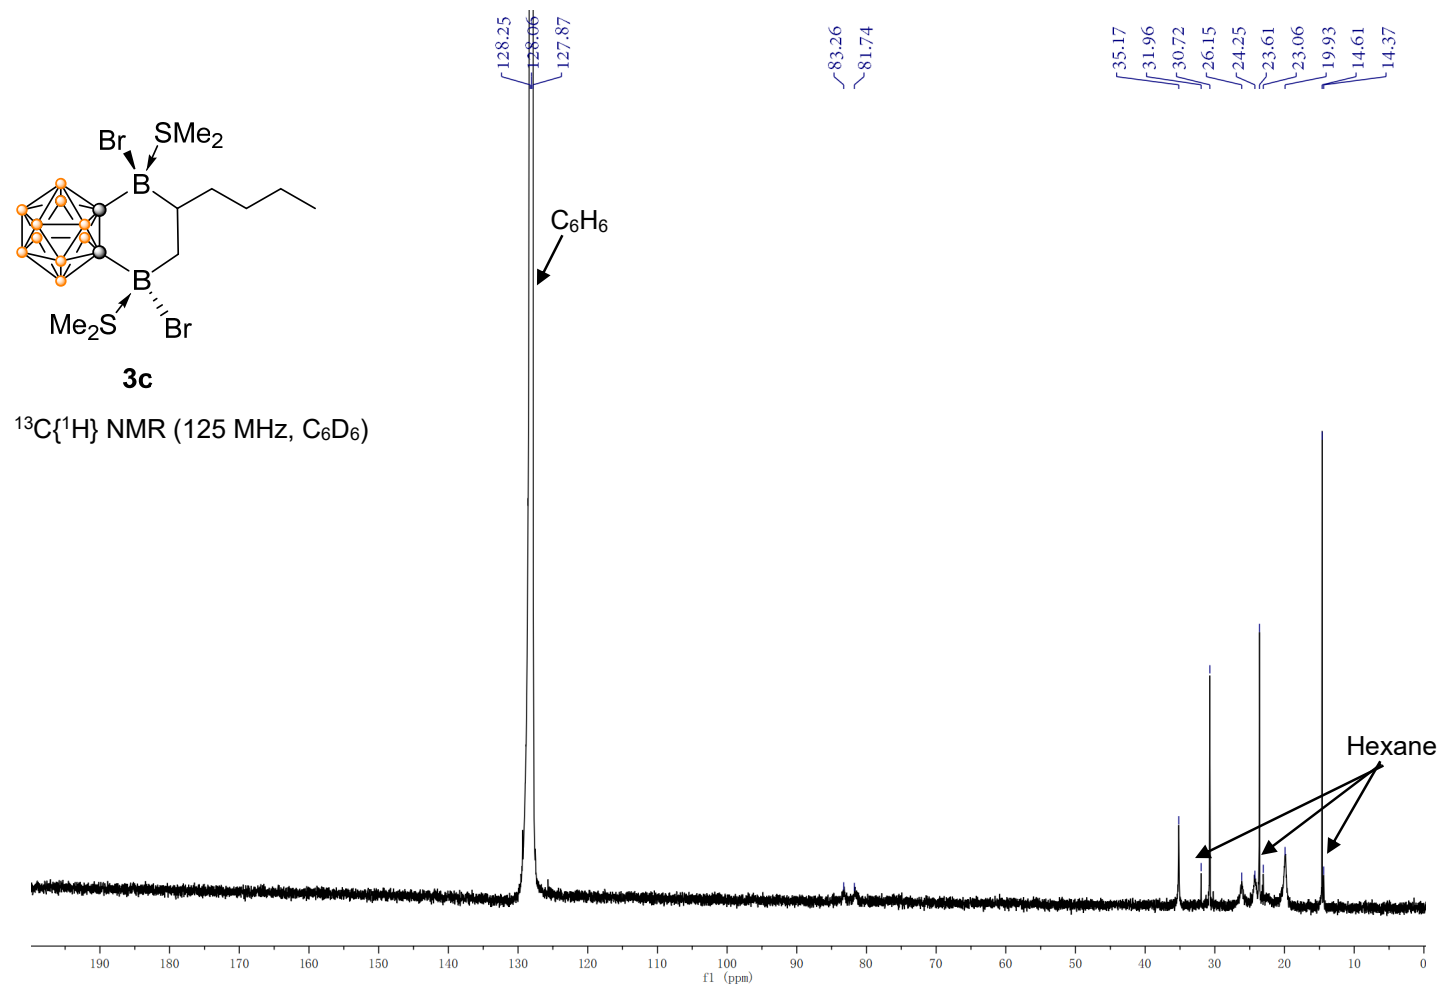

**Figure S19.**  $^{13}\text{C}\{^1\text{H}\}$  NMR spectrum of compound **3c**.

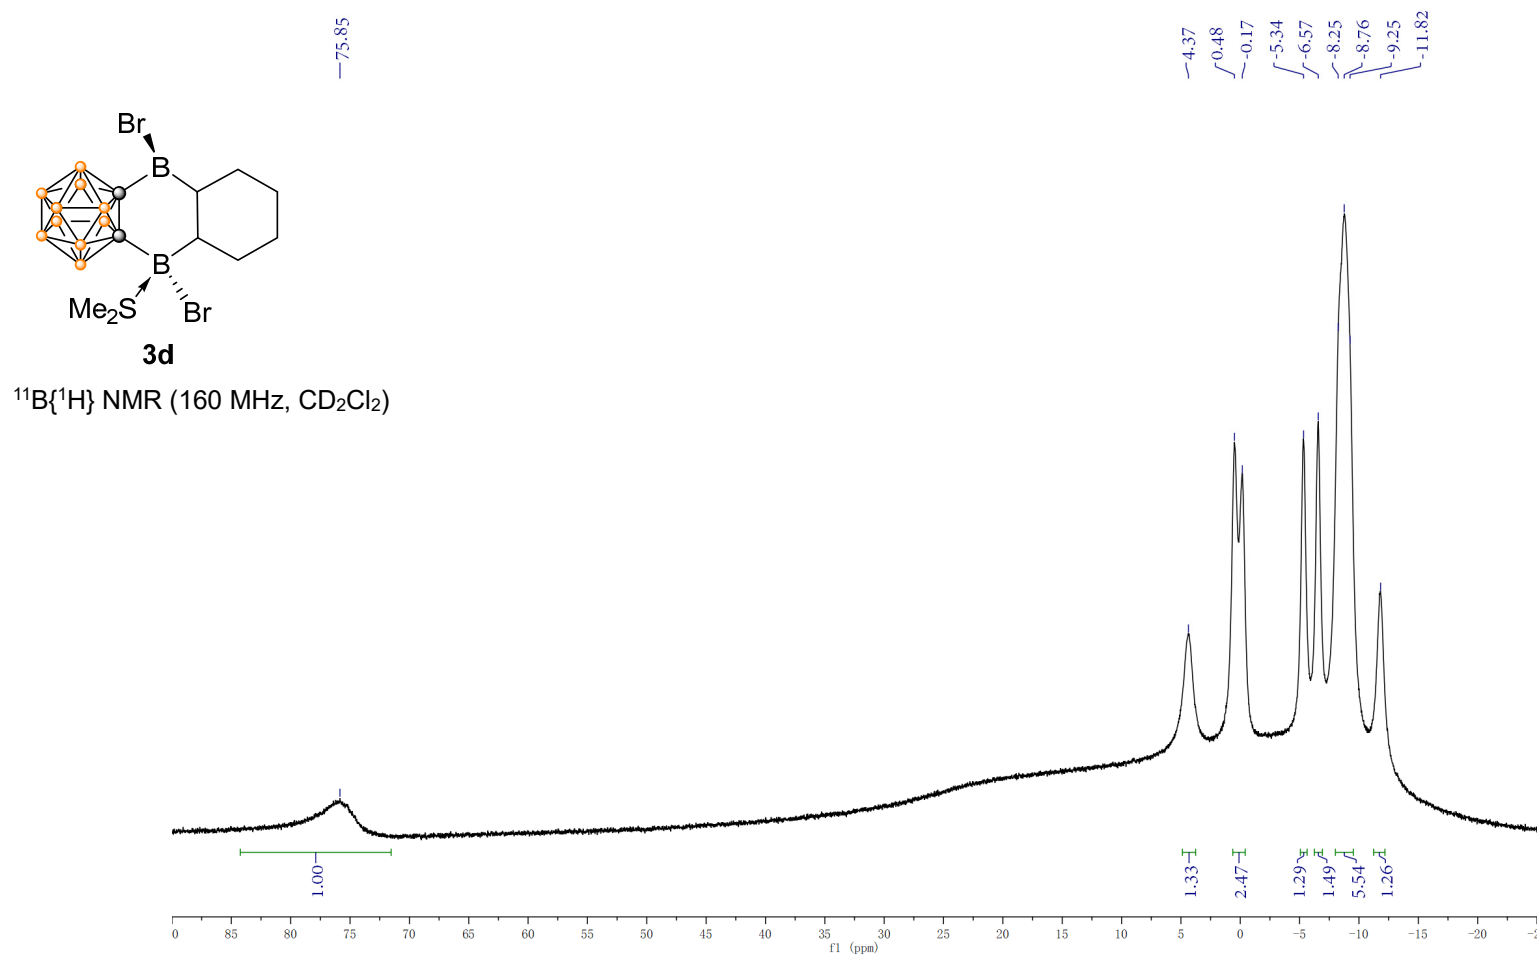

Figure S20.  $^{11}\text{B}\{^1\text{H}\}$  NMR spectrum of compound **3d**.

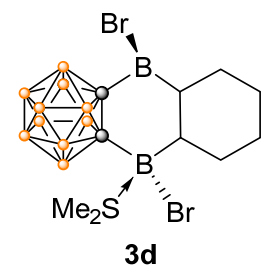

**3d**

$^{11}\text{B}$  NMR (160 MHz,  $\text{CD}_2\text{Cl}_2$ )

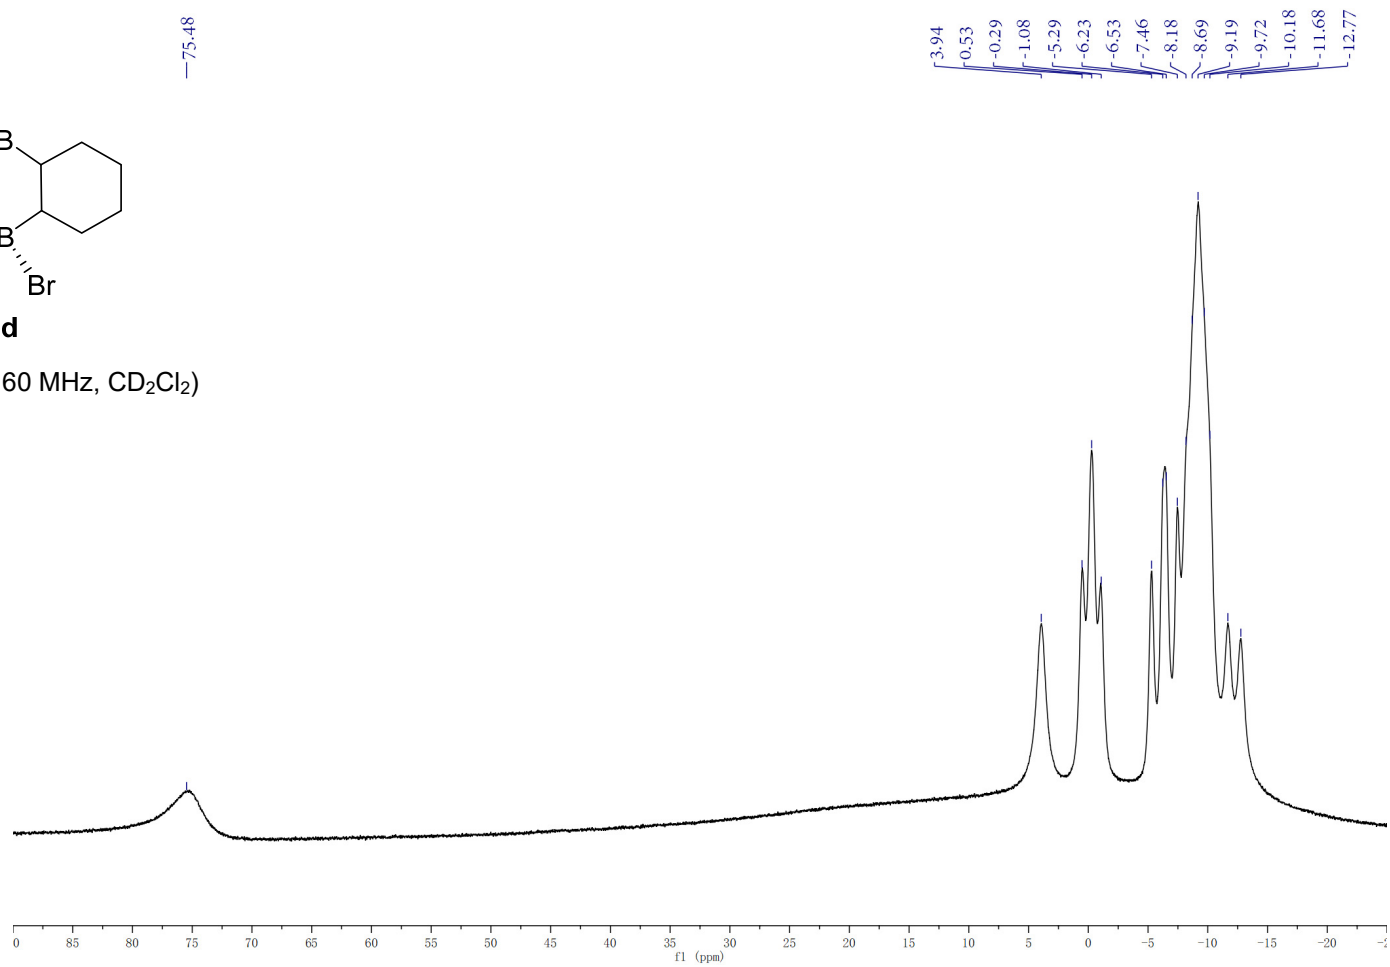

**Figure S21.**  $^{11}\text{B}$  NMR spectrum of compound **3d**.

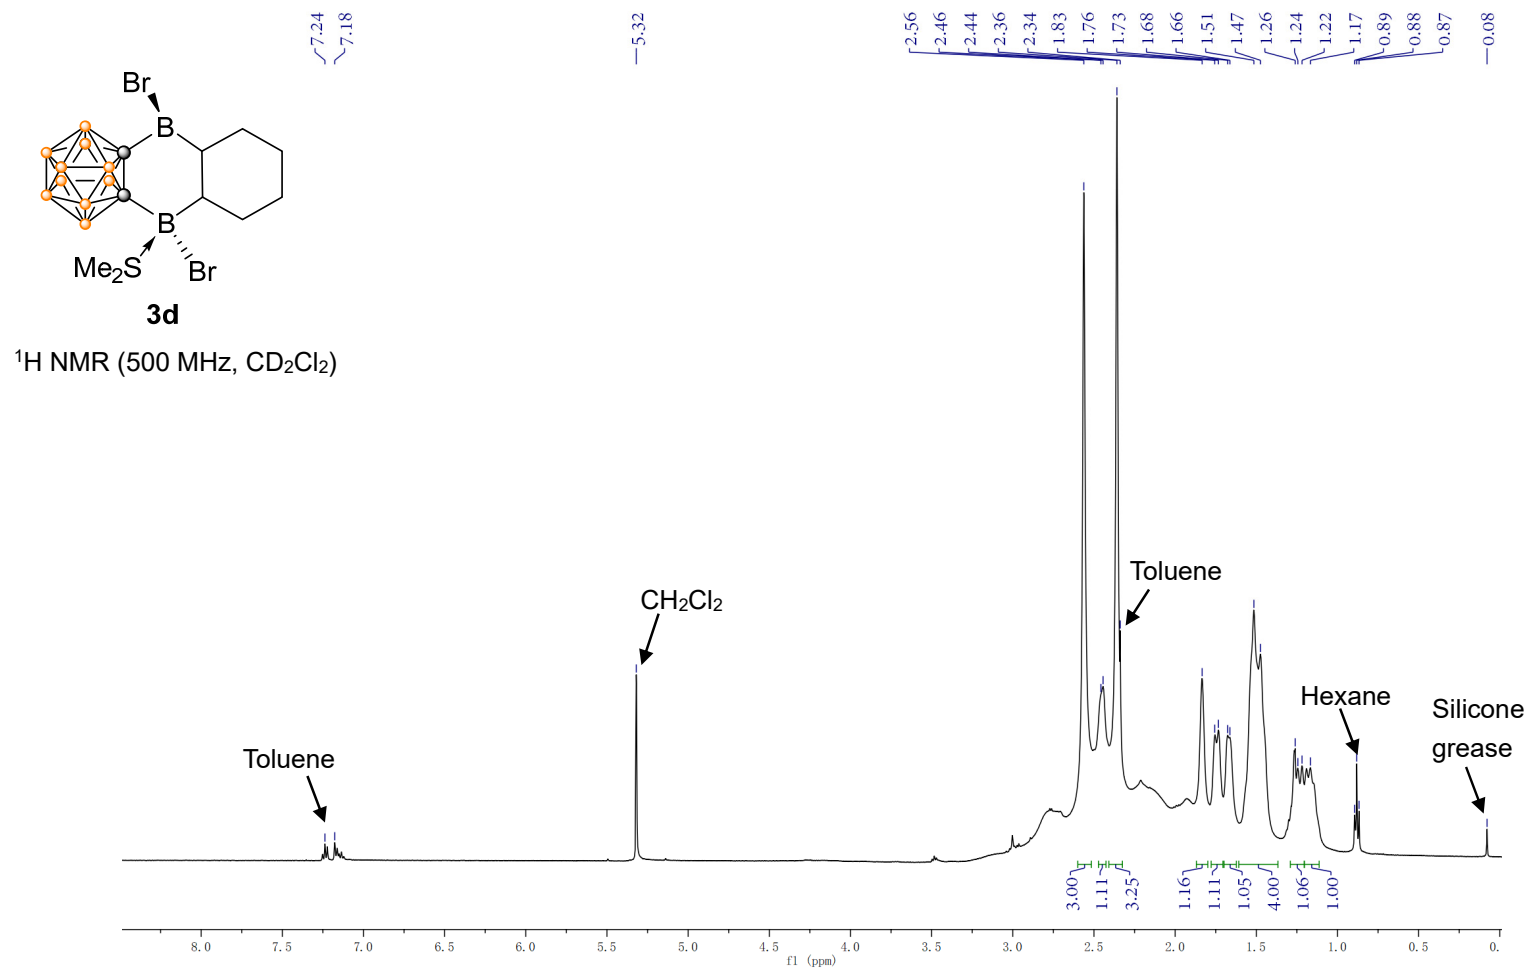

**Figure S22.** <sup>1</sup>H NMR spectrum of compound **3d**.

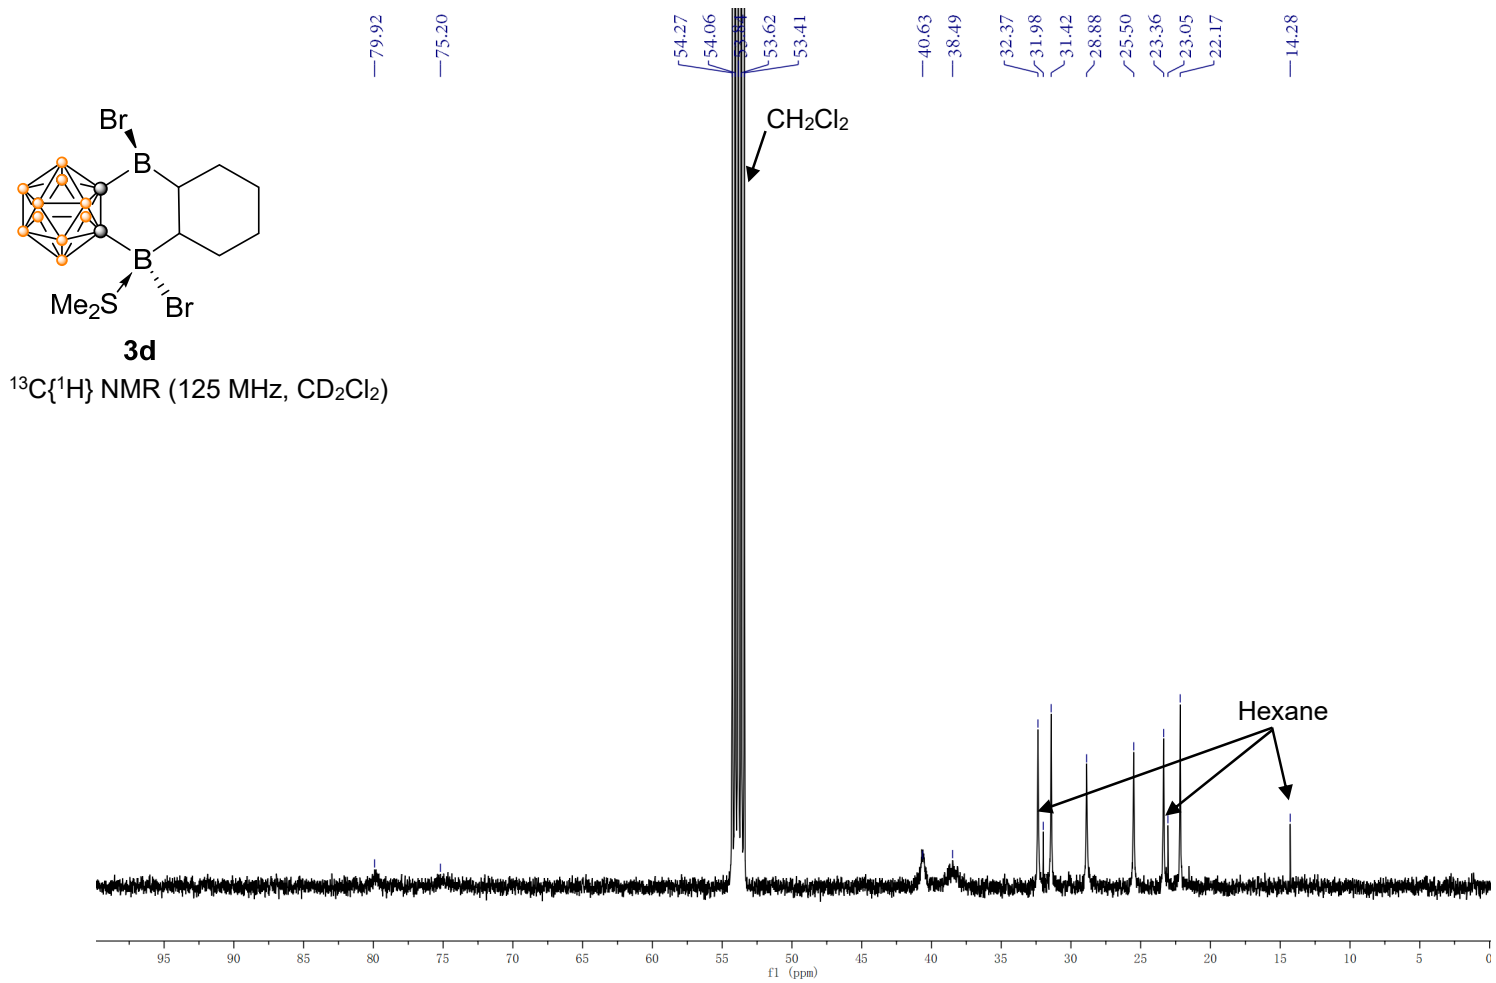

**Figure S23.**  $^{13}\text{C}\{^1\text{H}\}$  NMR spectrum of compound **3d**.

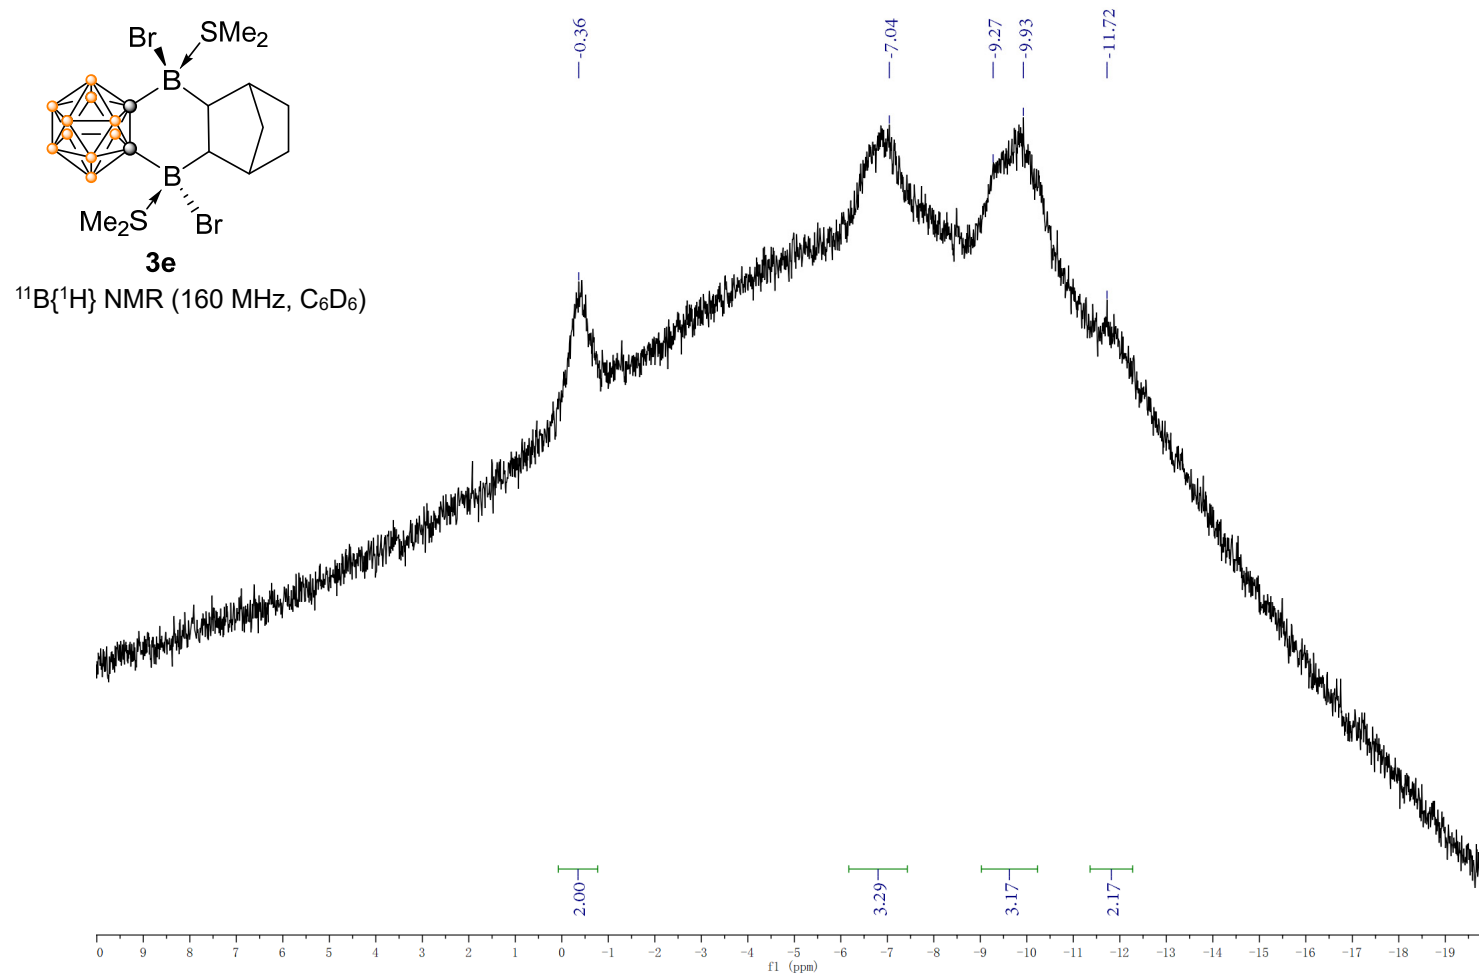

**Figure S24.**  $^{11}\text{B}\{^1\text{H}\}$  NMR spectrum of compound **3e**.



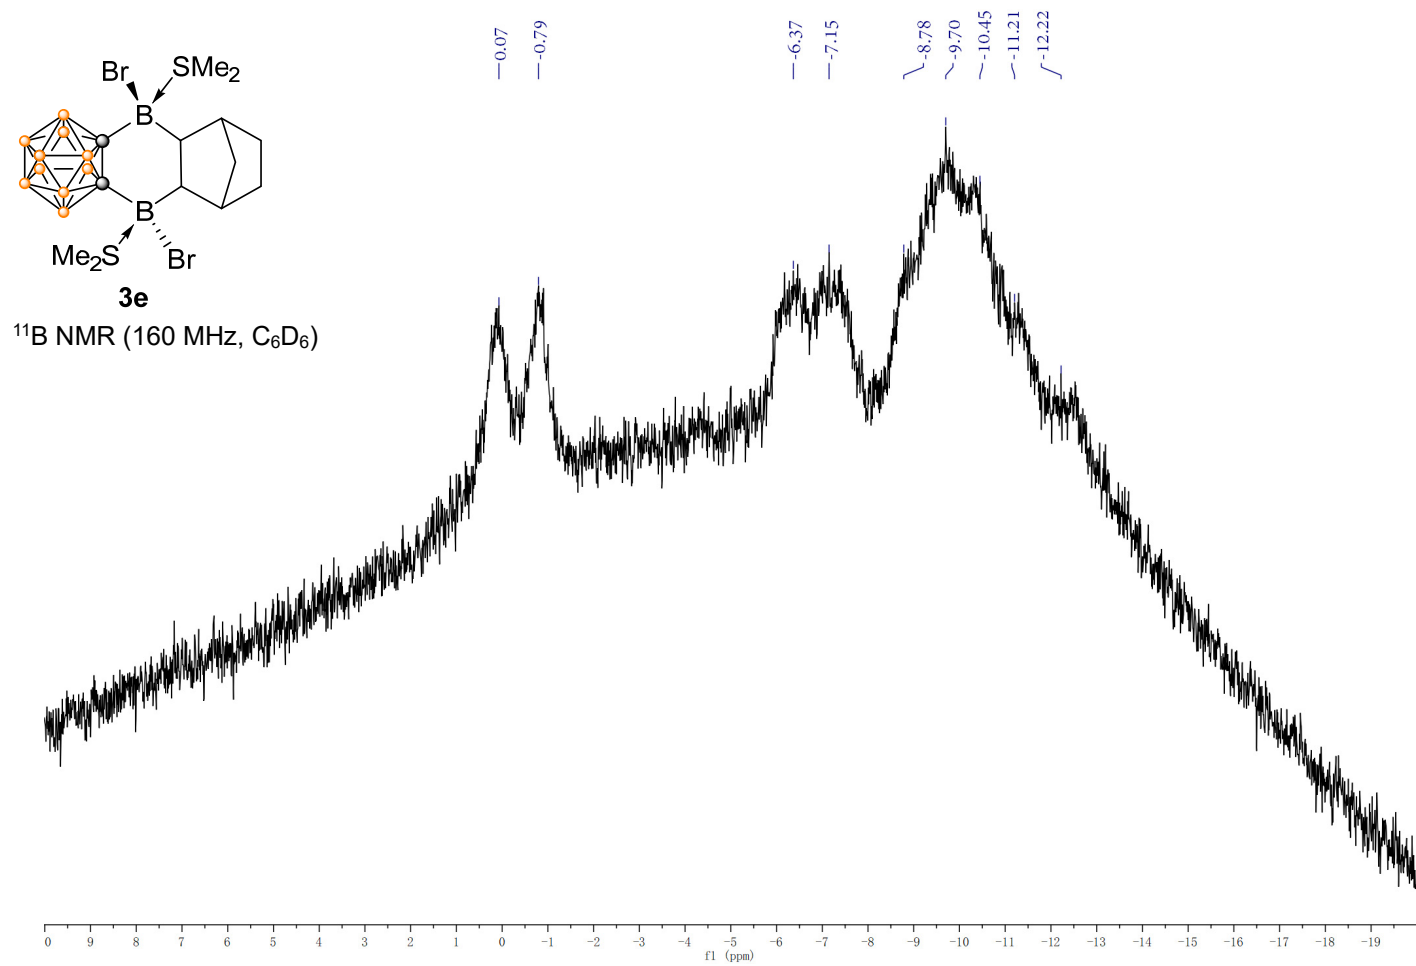

**Figure S25.**  $^{11}\text{B}$  NMR spectrum of compound **3e**.

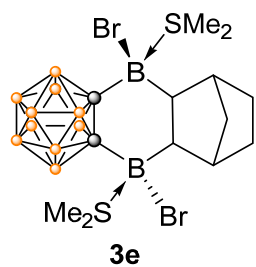

$^1\text{H NMR}$  (400 MHz,  $\text{CD}_2\text{Cl}_2$ )

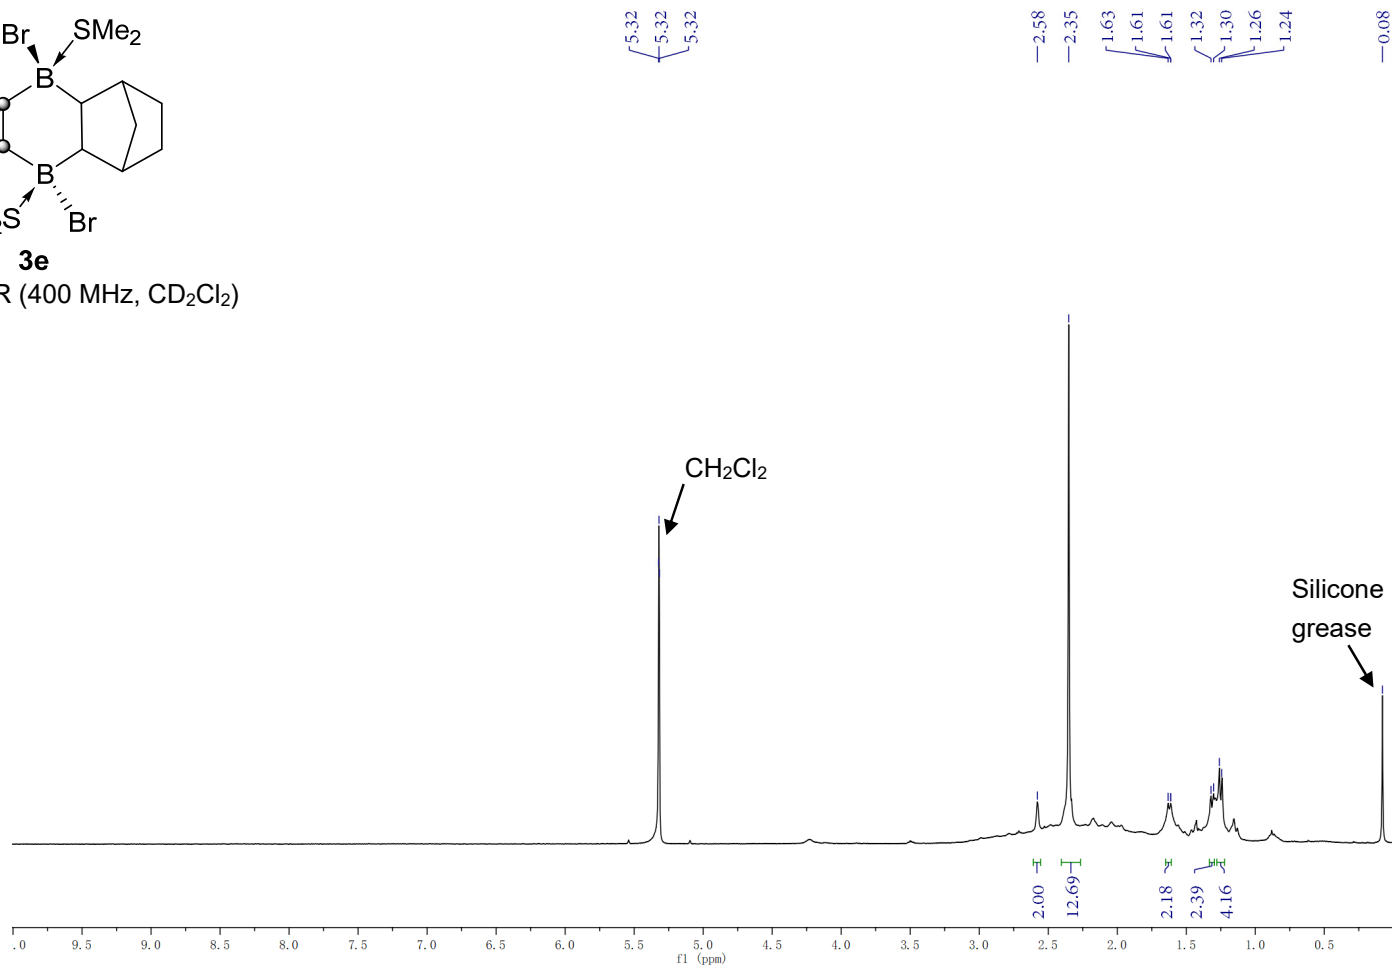

**Figure S26.**  $^1\text{H NMR}$  spectrum of compound **3e**.

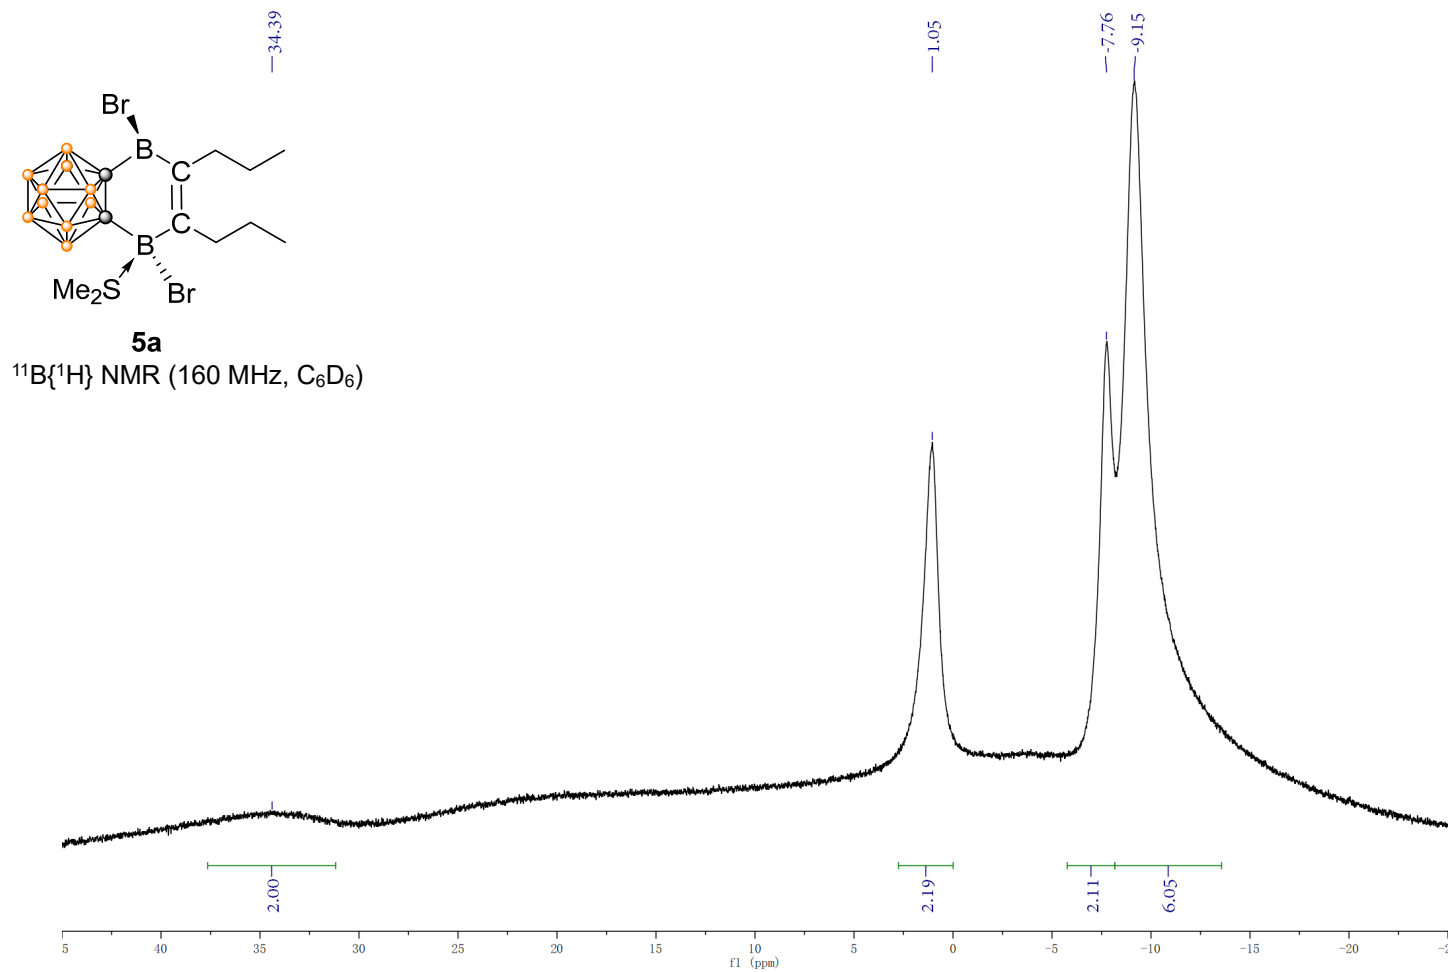

**Figure S27.**  $^{11}\text{B}\{^1\text{H}\}$  NMR spectrum of compound **5a**.

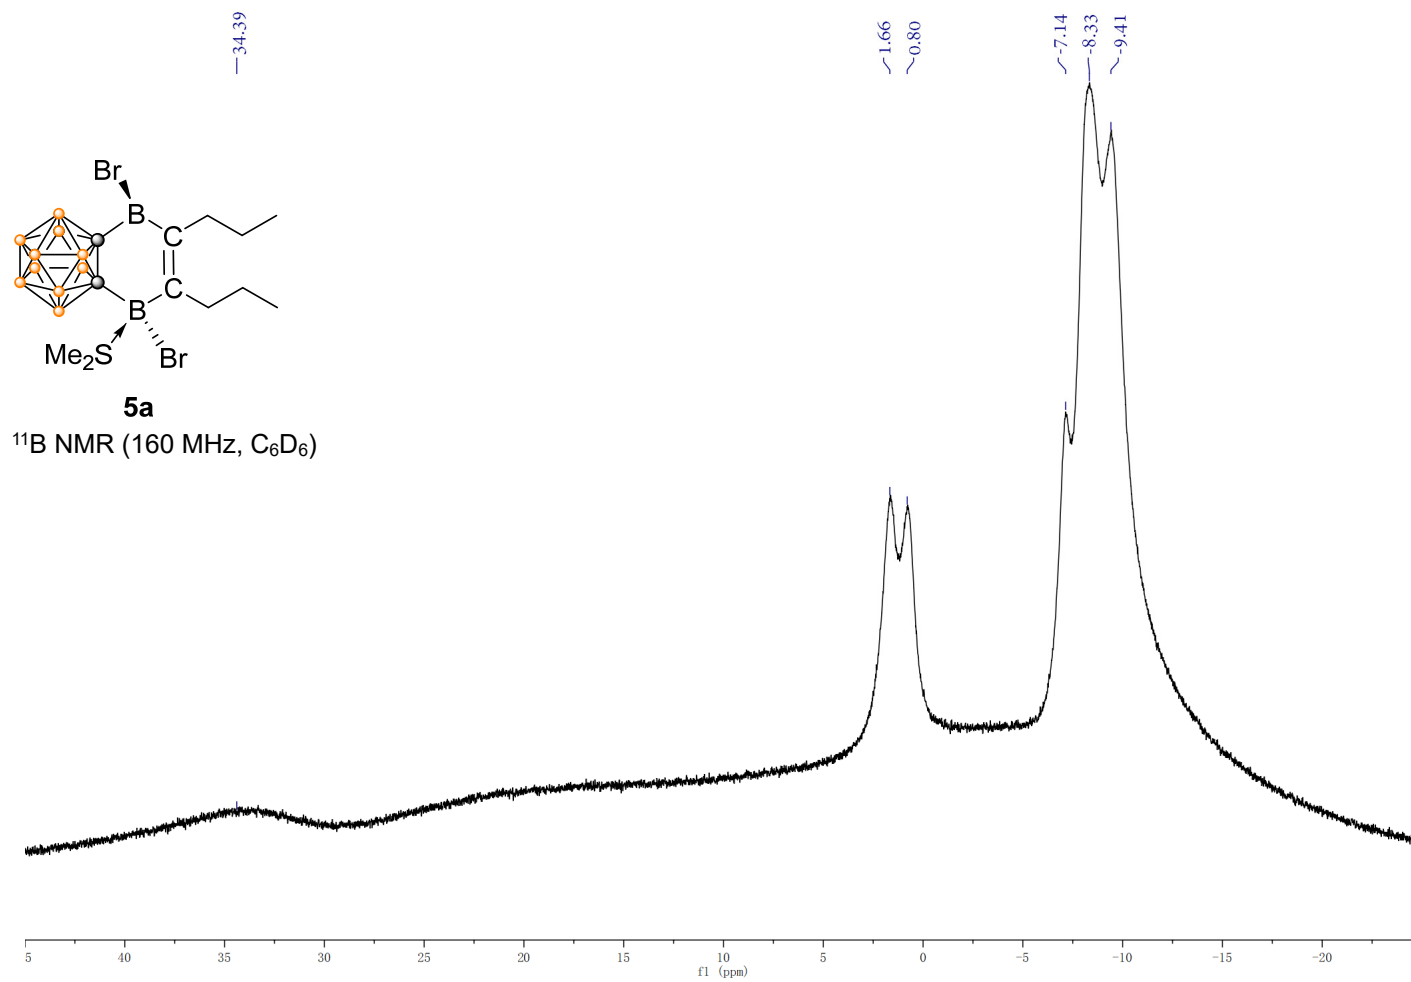

**Figure S28.**  $^{11}\text{B}$  NMR spectrum of compound **5a**.

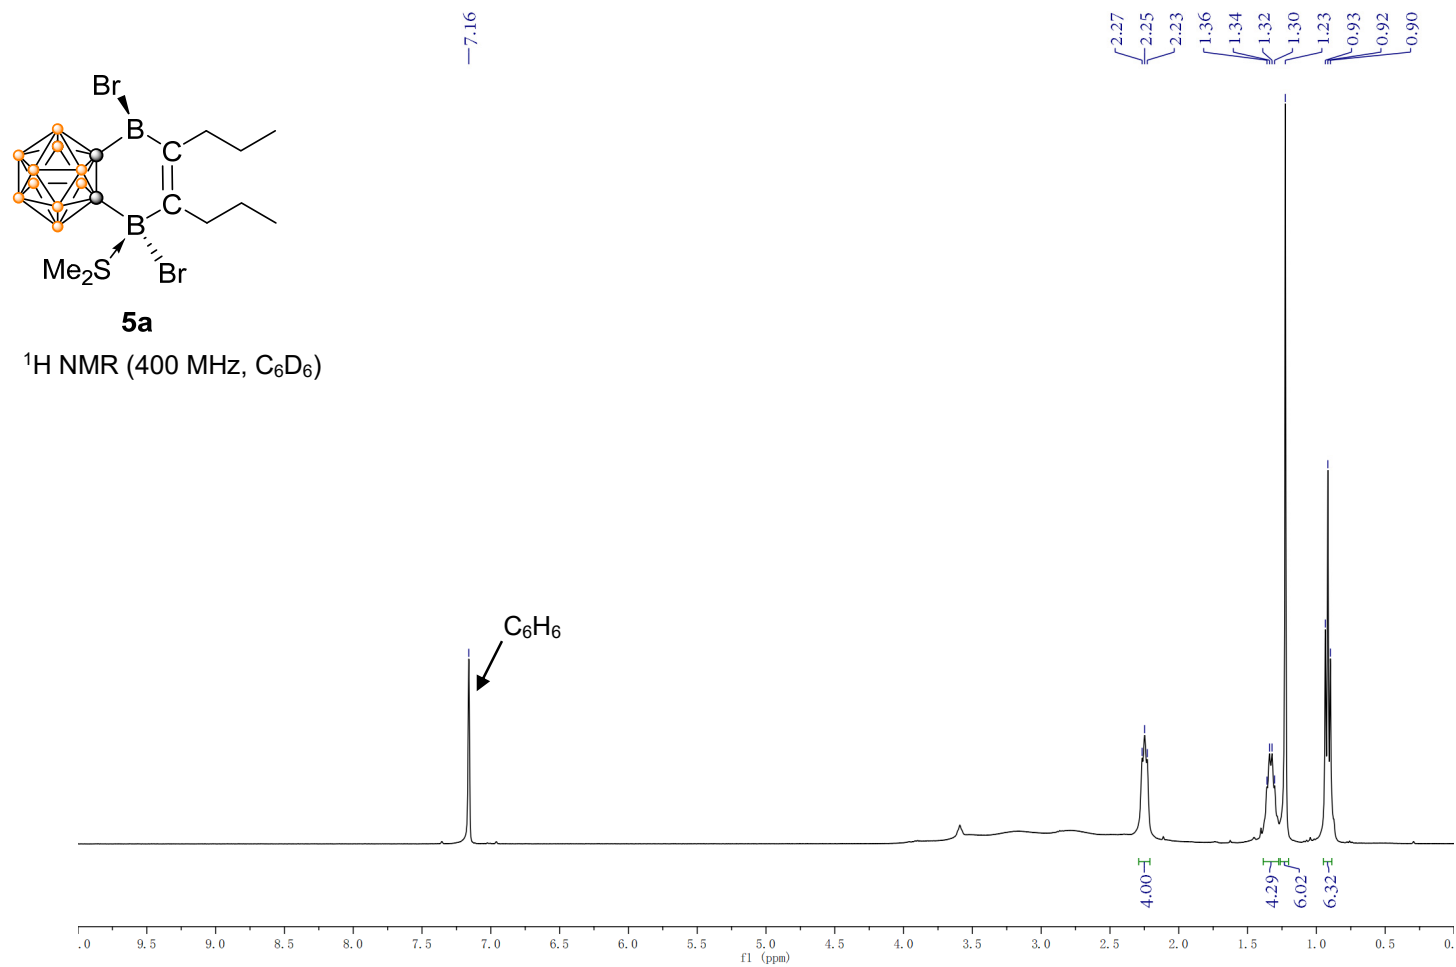

**Figure S29.** <sup>1</sup>H NMR spectrum of compound **5a**.

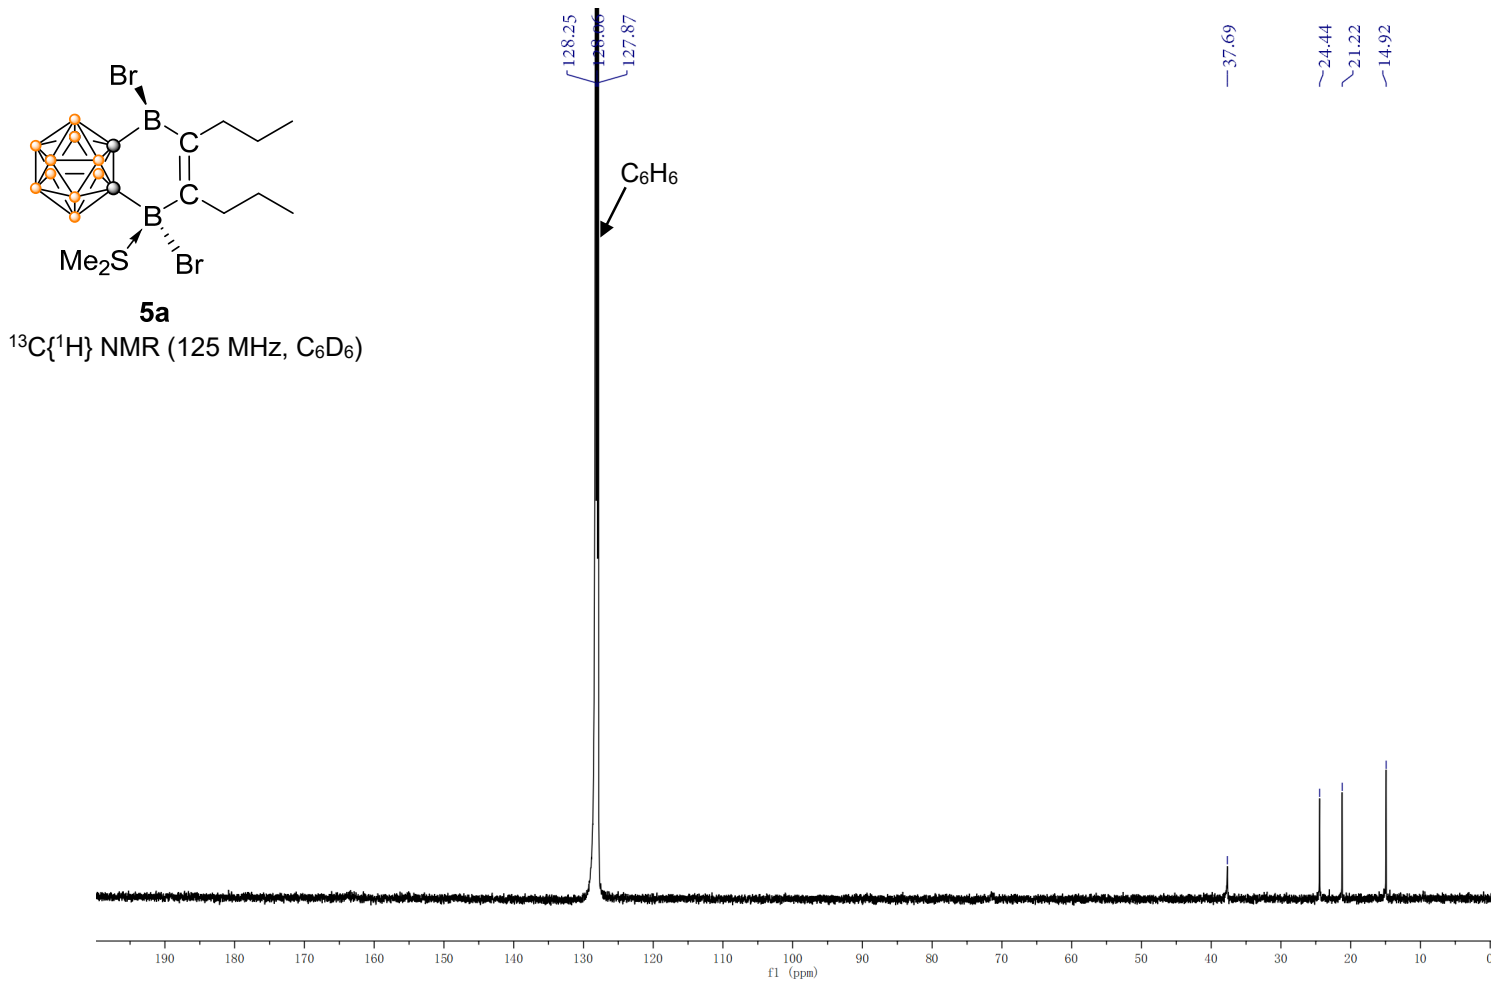

**Figure S30.**  $^{13}\text{C}\{^1\text{H}\}$  NMR spectrum of compound **5a**.

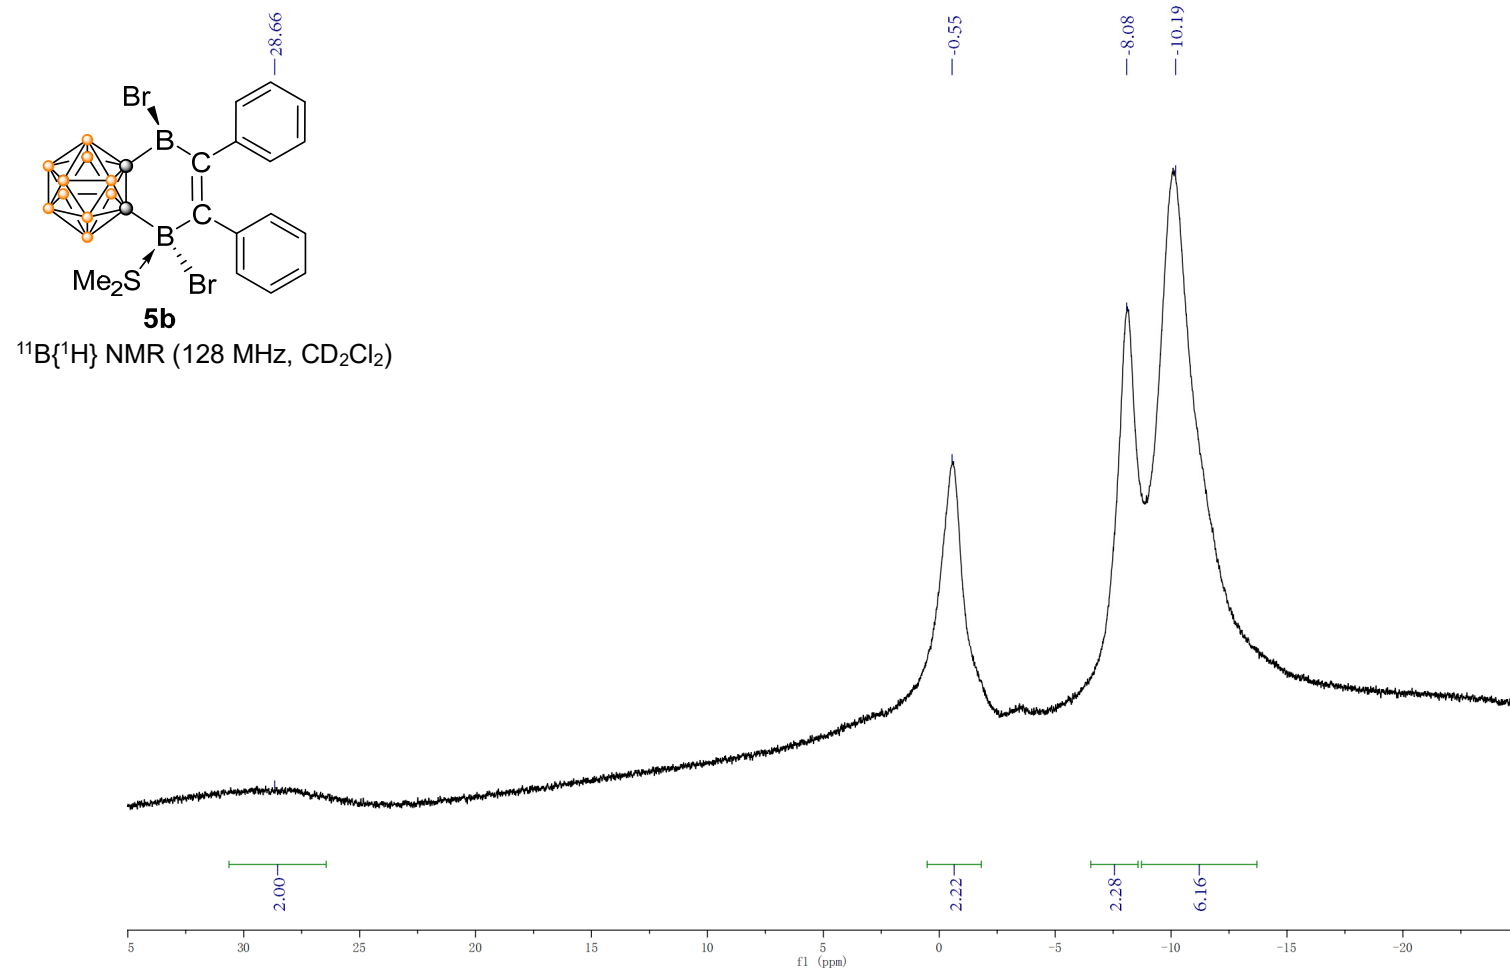

**Figure S31.**  $^{11}\text{B}\{^1\text{H}\}$  NMR spectrum of compound **5b**.

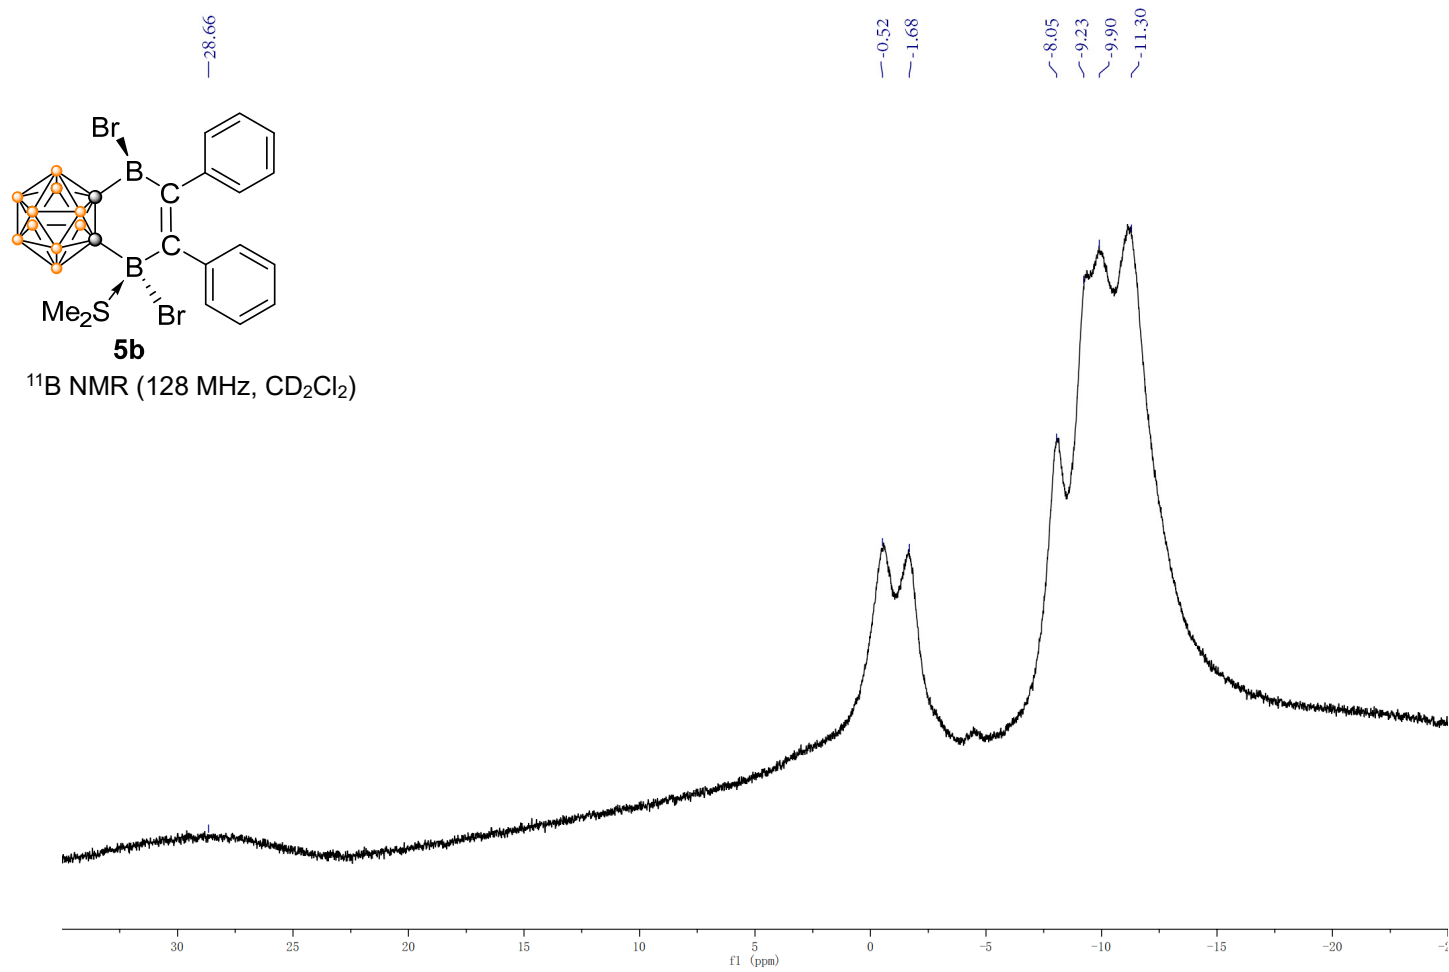

**Figure S32.**  $^{11}\text{B}$  NMR spectrum of compound **5b**.



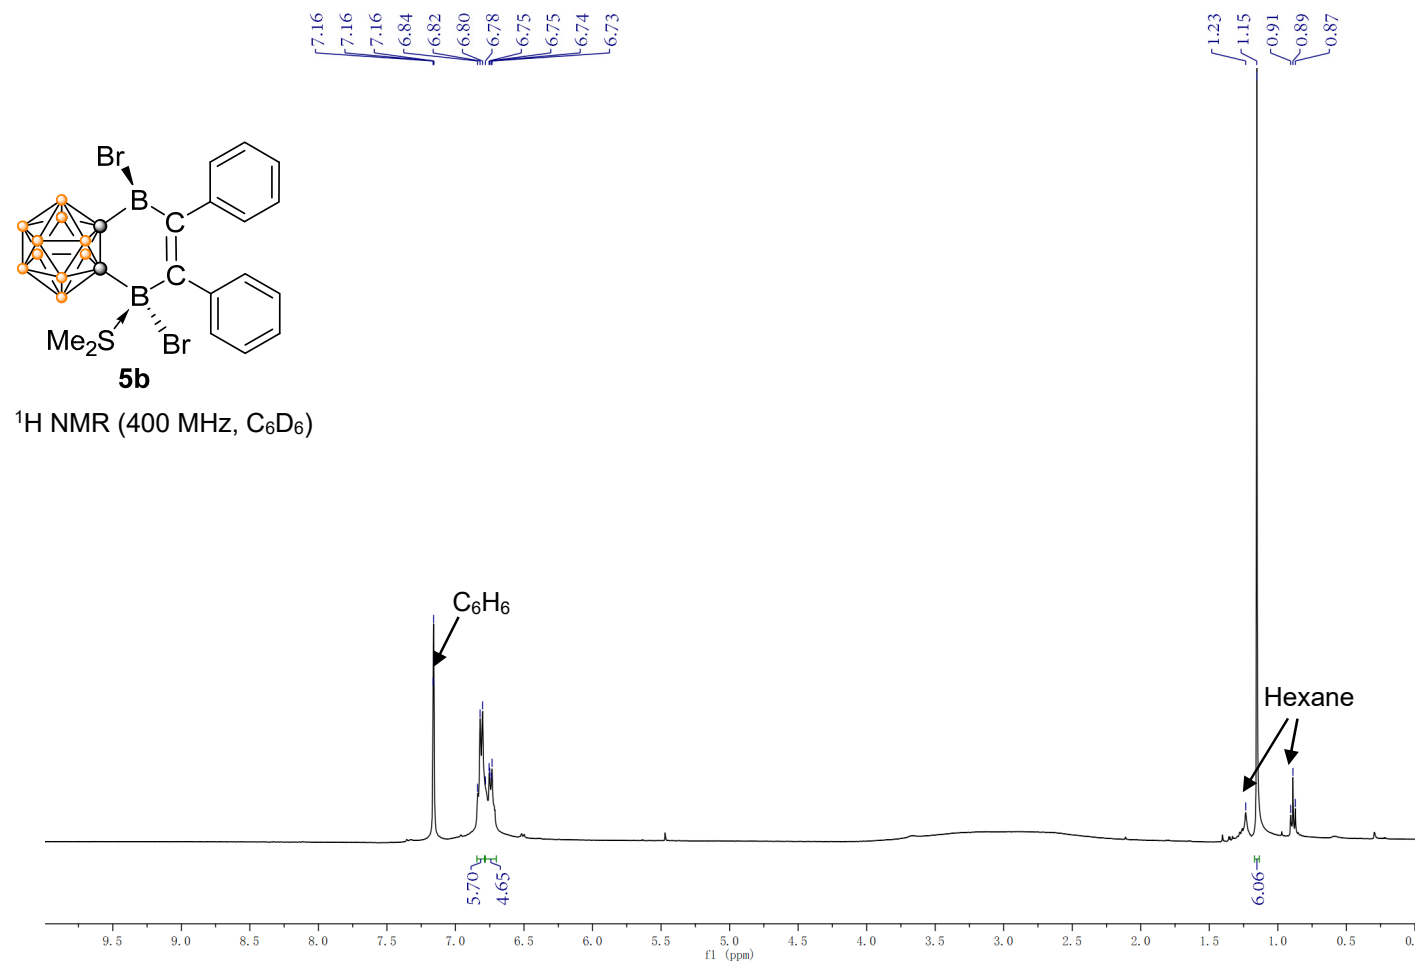

**Figure S33.**  $^1\text{H NMR}$  spectrum of compound **5b**.

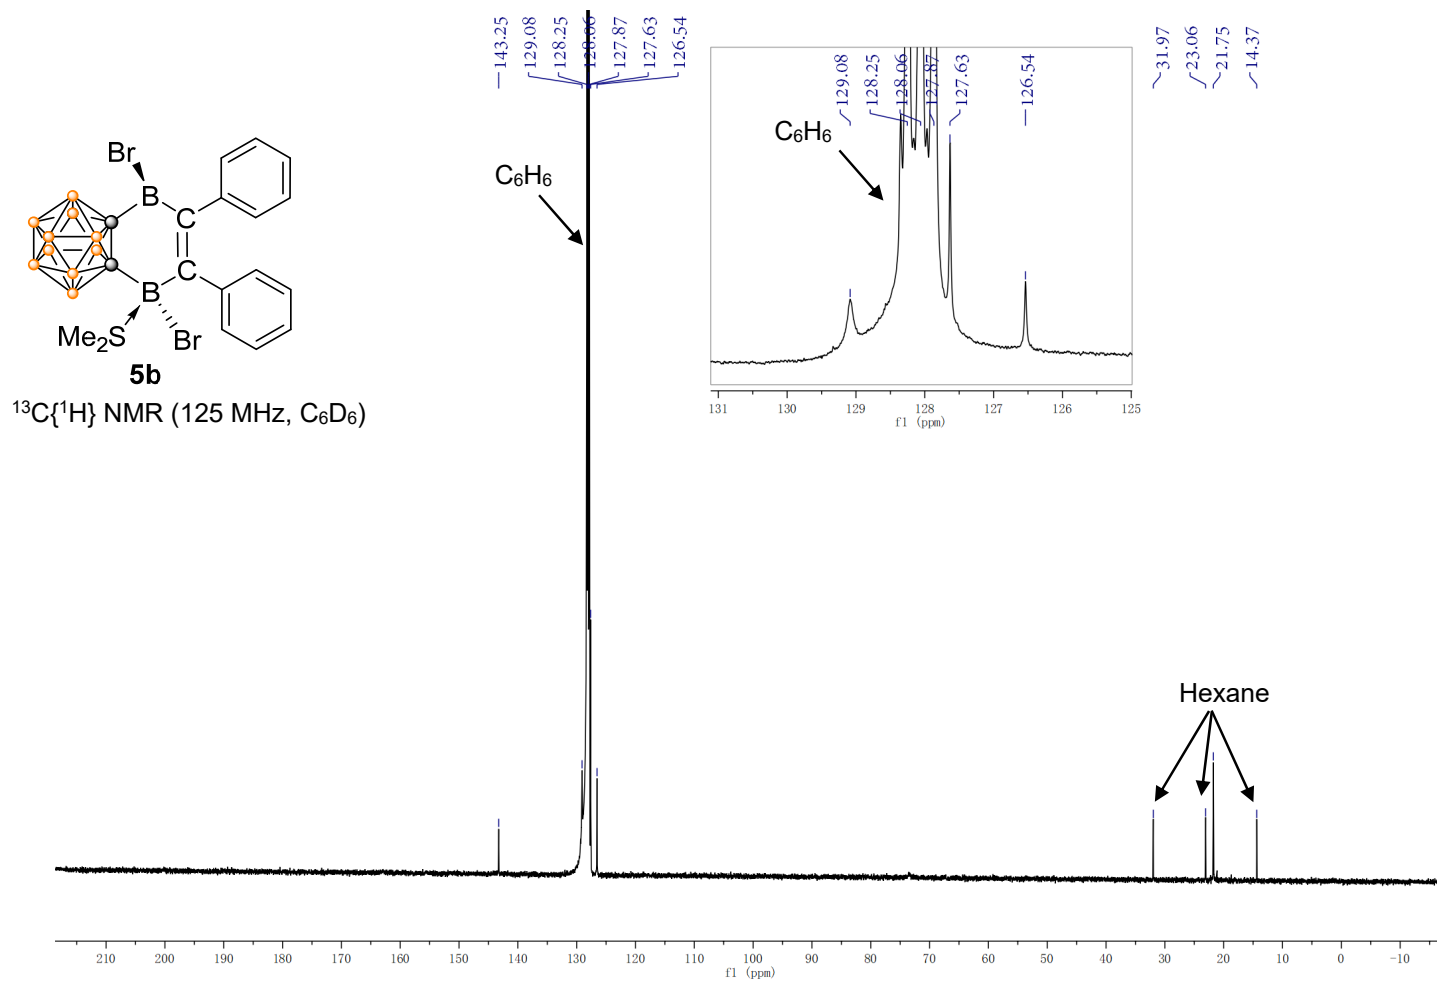

**Figure S34.**  $^{13}\text{C}\{^1\text{H}\}$  NMR spectrum of compound **5b**.

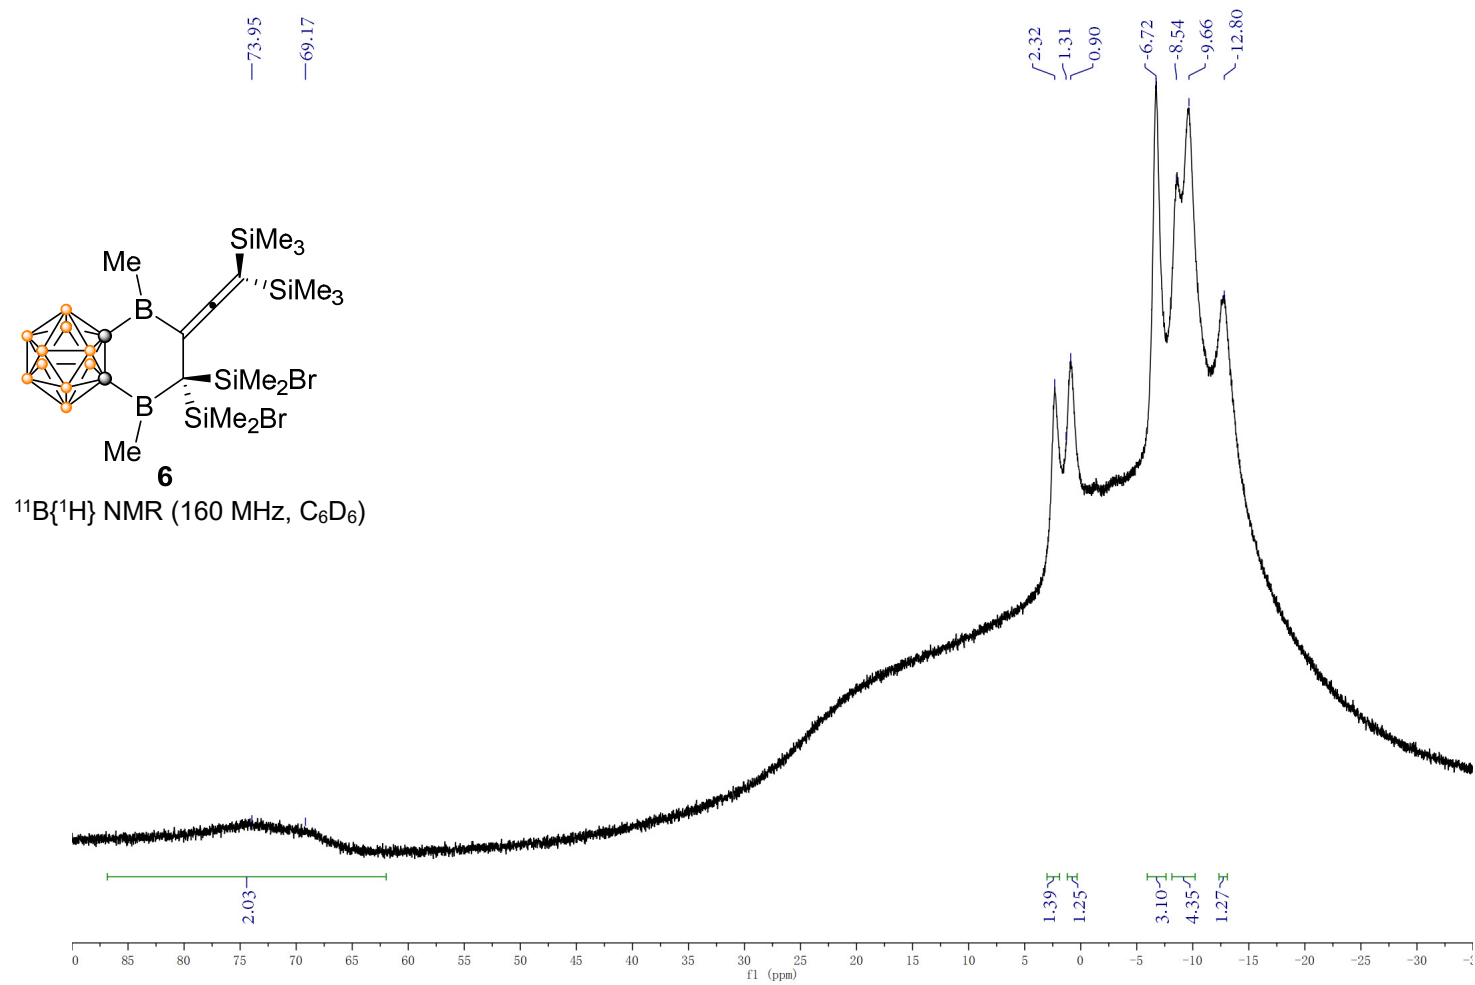

Figure S35. <sup>11</sup>B{<sup>1</sup>H} NMR spectrum of compound **6**.

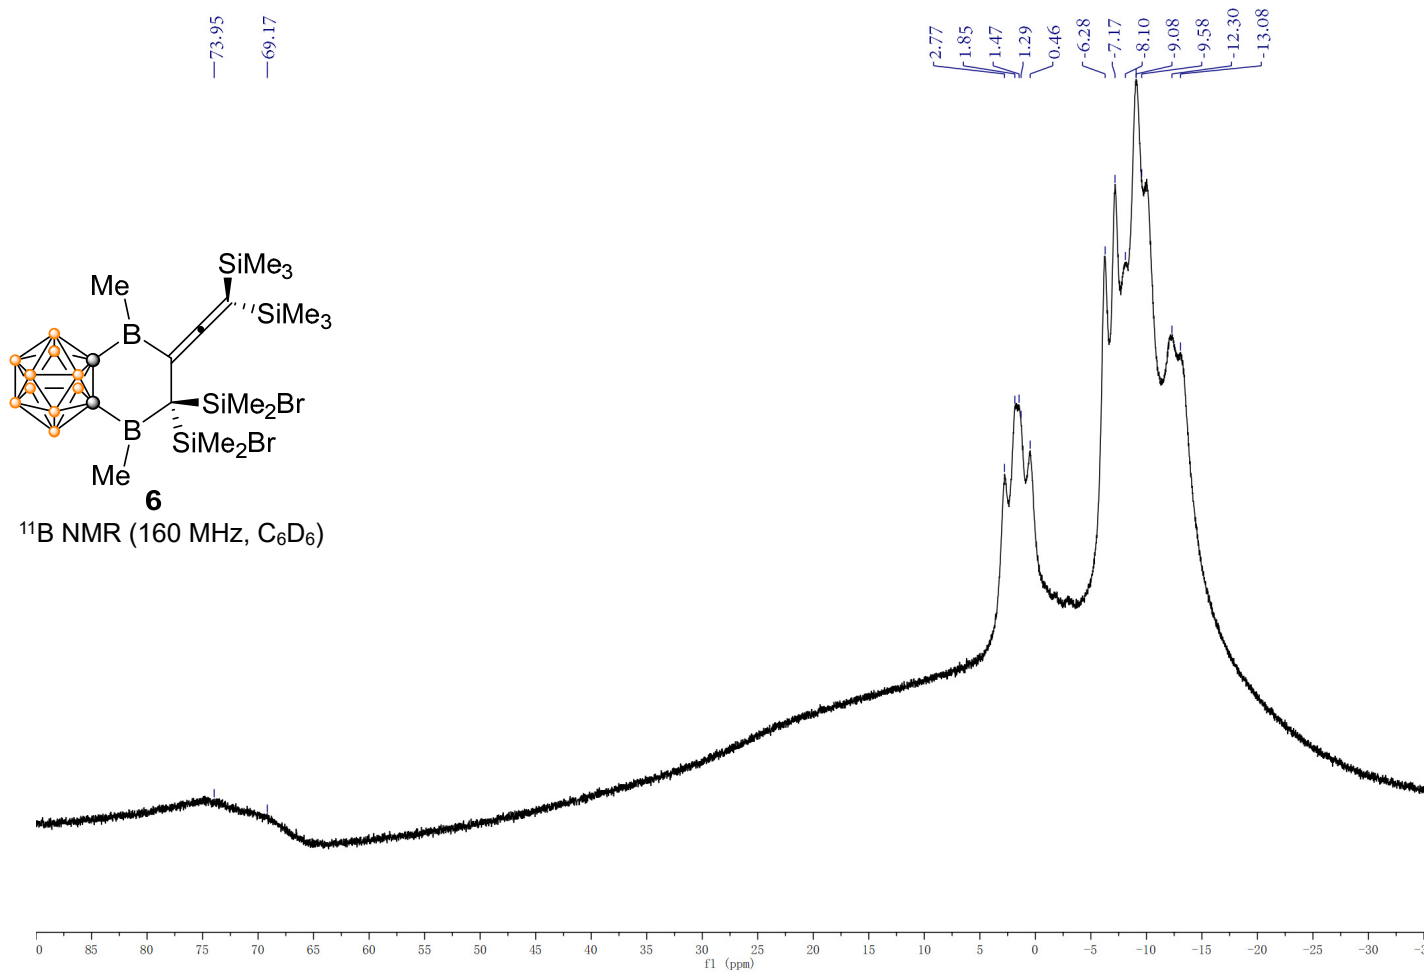

**Figure S36.**  $^{11}\text{B}$  NMR spectrum of compound **6**.

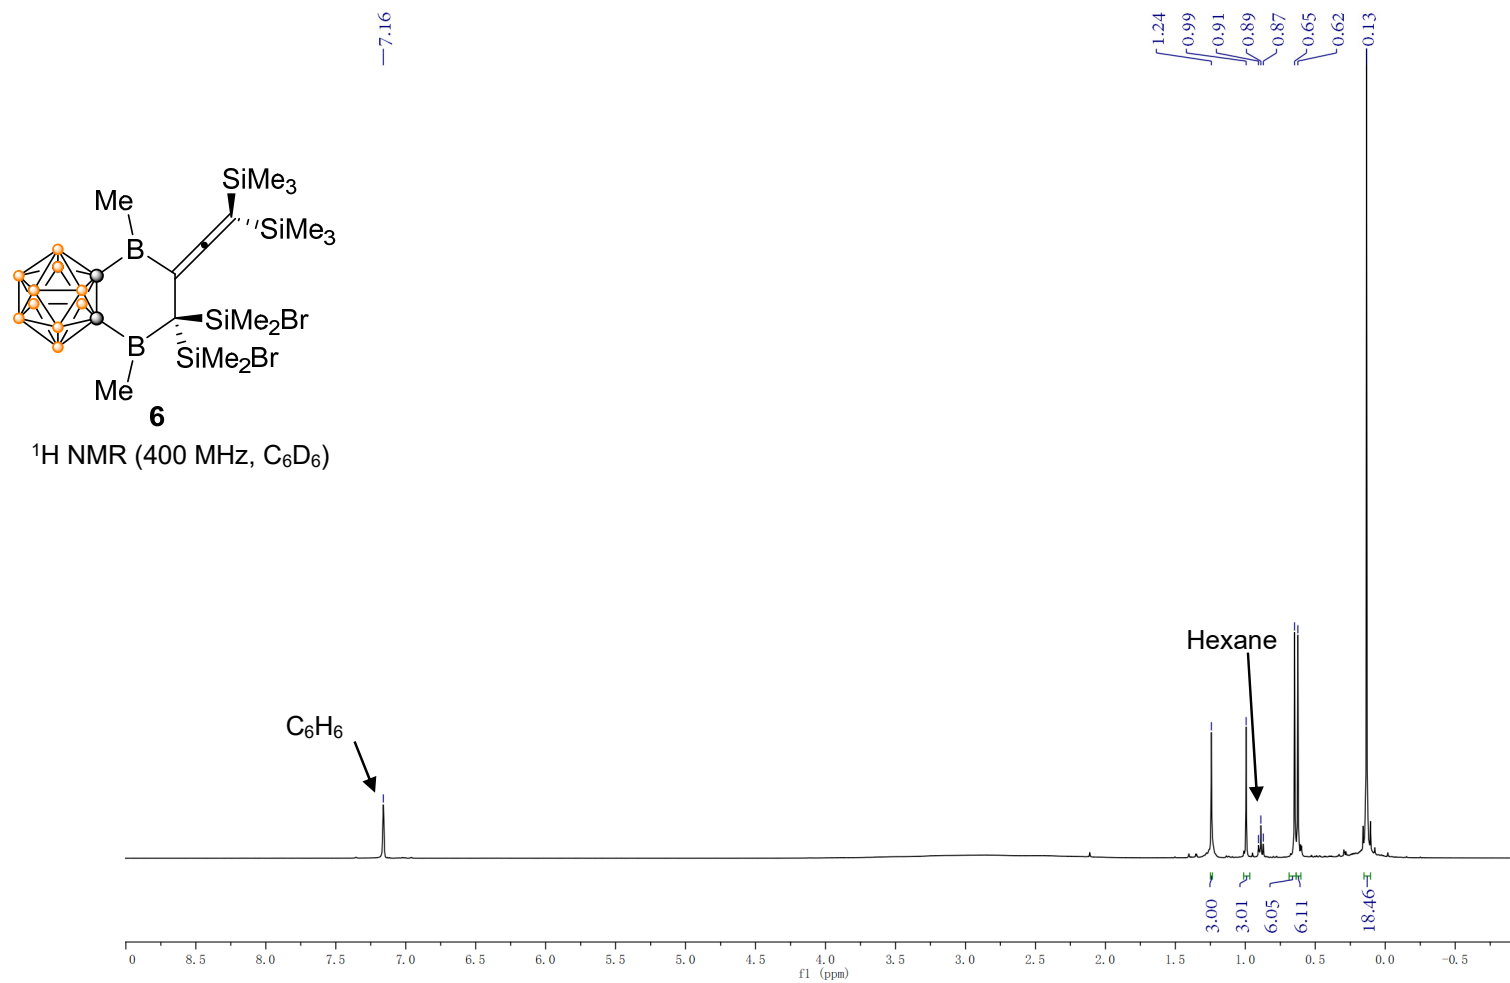

**Figure S37.**  $^1\text{H}$  NMR spectrum of compound **6**.

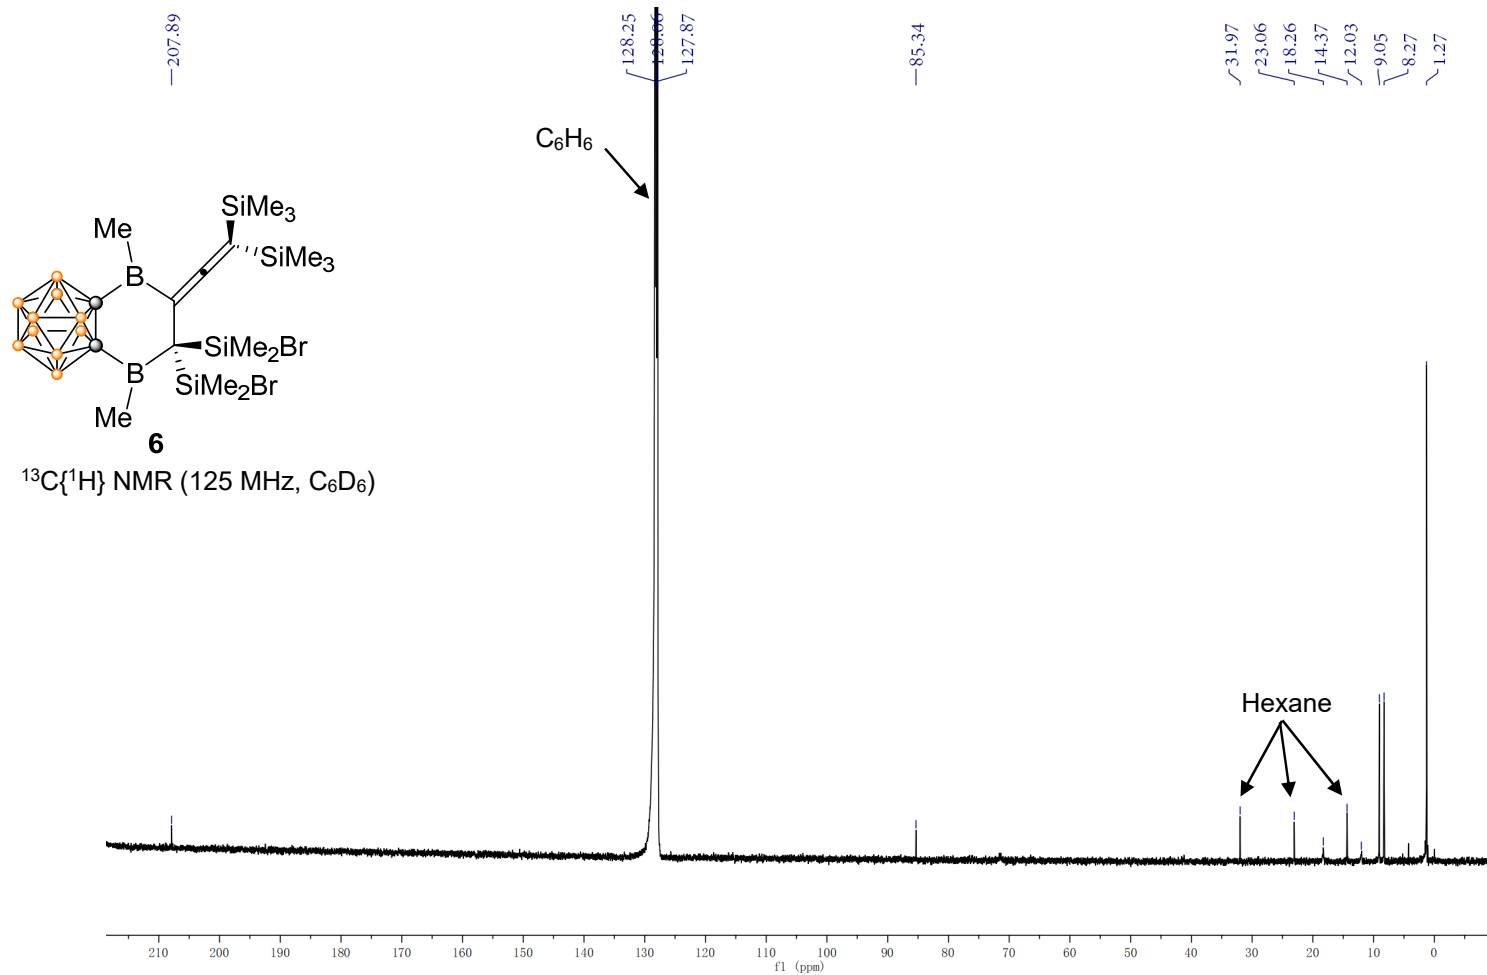

**Figure S38.** <sup>13</sup>C{<sup>1</sup>H} NMR spectrum of compound **6**.

## References

- 1 M. Arrowsmith, J. Böhnke, B. H. raunschweig, A. Deußenberger, R. D. Dewhurst, W. C. Ewing, C. Hörl, J. Mies and J. H. Muessig, *Chem. Commun.*, 2017, **53**, 8265-8367.
- 2 (a) Y. Shoji, N. Tanaka, S. Muranaka, N. Shigeno, H. Sugiyama, K. Takenouchi, F. Hajjaj and T. Fukushima, *Nat. Commun.*, 2016, **7**, 12704; (b) B. Wrackmeyer, O. L. Tok, W. Milius, M. H. Bhatti, S. Ali and Z. *Naturforsch.*, 2002, **58b**, 133-138.
- 3 G. M. Sheldrick, SADABS: Program for Empirical Absorption Correction of Area Detector Data. University of Göttingen: Germany, 1996.
- 4 G. M. Sheldrick, SHELXTL 5.10 for Windows NT: Structure Determination Software Programs. Bruker Analytical X-ray Systems, Inc., Madison, Wisconsin, USA, 1997.
- 5 M. J. Frisch, G. W. Trucks, H. B. Schlegel, G. E. Scuseria, M. A. Robb, J. R. Cheeseman, G. Scalmani, V. Barone, B. Mennucci, G. A. Petersson, H. Nakatsuji, M. Caricato, X. Li, H. P. Hratchian, A. F. Izmaylov, J. Bloino, G. Zheng, J. L. Sonnenberg, M. Hada, M. Ehara, K. Toyota, R. Fukuda, J. Hasegawa, M. Ishida, T. Nakajima, Y. Honda, O. Kitao, H. Nakai, T. Vreven, J. A. Montgomery, Jr., J. E. Peralta, F. Ogliaro, M. Bearpark, J. J. Heyd, E. Brothers, K. N. Kudin, V. N. Staroverov, R. Kobayashi, J. Normand, K. Raghavachari, A. Rendell, J. C. Burant, S. S. Iyengar, J. Tomasi, M. Cossi, N. Rega, J. M. Millam, M. Klene, J. E. Knox, J. B. Cross, V. Bakken, C. Adamo, J. Jaramillo, R. Gomperts, R. E. Stratmann, O. Yazyev, A. J. Austin, R. Cammi, C. Pomelli, J. W. Ochterski, R. L. Martin, K. Morokuma, V. G. Zakrzewski, G. A. Voth, P. Salvador, J. J. Dannenberg, S. Dapprich, A. D. Daniels, Ö. Farkas, J. B. Foresman, J. V. Ortiz, J. Cioslowski and D. J. Fox, Gaussian 09, Revision D.01; Gaussian, Inc.: Pittsburgh, PA, 2009.
- 6 (a) A. D. Becke, *J. Chem. Phys.*, 1993, **98**, 5648-5652; (b) C. Lee, W. Yang and R. G. Parr, *Phys. Rev. B*, 1988, **37**, 785-789.
- 7 (a) S. Grimme, J. Antony, S. Ehrlich and H. Krieg, *J. Chem. Phys.*, 2010, **132**, 154104; (b) S. Grimme, *J. Comput. Chem.* 2006, **27**, 1787-1799.
- 8 (a) K. Fukui, *J. Phys. Chem.*, 1970, **74**, 4161-4163; (b) K. Fukui, *Acc. Chem. Res.*, 1981, **14**, 363-368.
- 9 (a) M. Cossi, N. Rega, G. Scalmani and V. Barone, *J. Comput. Chem.*, 2003, **24**, 669-681; (b) M. Cossi, V. Barone, R. Cammi and J. Tomasi, *Chem. Phys. Lett.*, 1996, **255**, 327-335; (c) M. Cossi, V. Barone, B. Mennucci and J. Tomasi, *Chem. Phys. Lett.*, 1988, **286**, 253-260; (d) M. Cossi, V. Barone and M. A. Robb, *J. Chem. Phys.* 1999, **111**, 5295-5302.
